# Supplementary material
Source: publisher figshare collection journal article supplement (https://acs.figshare.com/ndownloader/files/7712158)
Supplement: Supplementary file 1 [file 7712158]

## Sheet: Summary
Gene Name	Entrez ID	UNIPROT ID	Peptide sequence	UNIPROT-site	Group	M1	M2	M3	L1	L2	L3	S1	S2	S3	U1	U2	U3	M (Sum)	L (Sum)	S (Sum)	U (Sum)	Subcellular location (Uniprot)	Protein Found in Rhee et al (2013)	Site Found in Rhee et al (2013)	Protein Found in Hung et al (2014)?	Site Found in Hung et al (2014)?
UQCRQ	27089	O14949	HVISySLSPFEQR	O14949-17	I	11	12	12	0	0	0	0	0	0	0	0	0	35	0	0	0	Mitochondrion inner membrane.	1	1	1	0
NDUFA2	4695	O43678	yAFGQETNVPLNNFSADQVTR	O43678-69	I	9	6	5	0	0	0	0	0	0	0	0	0	20	0	0	0	Mitochondrion inner membrane; Peripheral membrane protein; Matrix side.	1	1	0	0
CS	1431	O75390	AyAQGISR	O75390-185	I	3	2	0	0	0	0	0	0	0	0	0	0	5	0	0	0	Mitochondrion matrix.	1	1	0	0
CS	1431	O75390	LVAQLyKIVPNVLLEQGK	O75390-381	I	1	0	3	0	0	0	0	0	0	0	0	0	4	0	0	0	Mitochondrion matrix.	1	1	0	0
ATP5H	10476	O75947	LAALPENPPAIDWAyYK	O75947-56	I	1	2	1	0	0	0	0	0	0	0	0	0	4	0	0	0	Mitochondrion. Mitochondrion inner membrane.	1	1	0	0
ATP5L	10632	O75964	LATFWyYAK	O75964-32	I	2	2	0	0	0	0	0	0	0	0	0	0	4	0	0	0	Mitochondrion. Mitochondrion inner membrane.	1	1	0	0
GLS	2744	O94925-3	VSPESNEDISTTVVyR	O94925-3-589	I	6	5	8	0	0	0	0	0	0	0	0	0	19	0	0	0	Isoform 1: Cytoplasm, cytosol.; SUBCELLULAR LOCATION: Isoform 3: Mitochondrion.	1	0	0	0
LETM1	3954	O95202	LEEGGPVySPPAEVVVK	O95202-141	I	8	0	7	0	0	0	0	0	0	0	0	0	15	0	0	0	Mitochondrion inner membrane {ECO:0000269|PubMed:14706454, ECO:0000269|PubMed:15138253, ECO:0000269|PubMed:18628306}; Single-pass membrane protein {ECO:0000269|PubMed:14706454, ECO:0000269|PubMed:15138253, ECO:0000269|PubMed:18628306}.	1	1	1	0
LETM1	3954	O95202	AMyLPDTLSPADQLK	O95202-422	I	2	0	4	0	0	0	0	0	0	0	0	0	6	0	0	0	Mitochondrion inner membrane {ECO:0000269|PubMed:14706454, ECO:0000269|PubMed:15138253, ECO:0000269|PubMed:18628306}; Single-pass membrane protein {ECO:0000269|PubMed:14706454, ECO:0000269|PubMed:15138253, ECO:0000269|PubMed:18628306}.	1	0	1	0
OAT	4942	P04181	TVQGPPTSDDIFEREyK	P04181-48	I	1	0	1	0	0	0	0	0	0	0	0	0	2	0	0	0	Mitochondrion matrix {ECO:0000269|PubMed:23076989}.	1	0	0	0
ATP5B	506	P06576	AHGGySVFAGVGER	P06576-230	I	8	10	4	0	0	0	0	0	0	0	0	0	22	0	0	0	Mitochondrion. Mitochondrion inner membrane. Note=Peripheral membrane protein.	1	0	0	0
ATP5B	506	P06576	AIAELGIyPAVDPLDSTSR	P06576-395	I	8	9	6	0	0	0	0	0	0	0	0	0	23	0	0	0	Mitochondrion. Mitochondrion inner membrane. Note=Peripheral membrane protein.	1	1	0	0
ATP5B	506	P06576	IMDPNIVGSEHyDVAR	P06576-418	I	2	0	1	0	0	0	0	0	0	0	0	0	3	0	0	0	Mitochondrion. Mitochondrion inner membrane. Note=Peripheral membrane protein.	1	0	0	0
PDHA1	5160	P08559	YHGHSMSDPGVSyR	P08559-301	I	14	12	1	0	0	0	0	0	0	0	0	0	27	0	0	0	Mitochondrion matrix.	1	0	0	0
HSPD1	3329	P10809	GYISPyFINTSK	P10809-227	I	3	4	1	0	0	0	0	0	0	0	0	0	8	0	0	0	Mitochondrion matrix.	1	1	0	0
HSPD1	3329	P10809	IQEIIEQLDVTTSEyEKEK	P10809-385	I	8	0	7	0	0	0	0	0	0	0	0	0	15	0	0	0	Mitochondrion matrix.	1	1	0	0
HSPD1	3329	P10809	IMQSSSEVGyDAMAGDFVNMVEK	P10809-503	I	10	14	7	0	0	0	0	0	0	0	0	0	31	0	0	0	Mitochondrion matrix.	1	0	0	0
PDHB	5162	P11177	VFLLGEEVAQyDGAYK	P11177-63	I	7	3	4	0	0	0	0	0	0	0	0	0	14	0	0	0	Mitochondrion matrix.	1	1	0	0
PC	5091	P11498	SVVEFLQGyIGVPHGGFPEPFR	P11498-951	I	1	2	0	0	0	0	0	0	0	0	0	0	3	0	0	0	Mitochondrion matrix.	0	0	0	0
MTHFD2	10797	P13995	RPHLSVILVGENPASHSyVLNK	P13995-84	I	4	4	16	0	0	0	0	0	0	0	0	0	24	0	0	0	Mitochondrion.	1	0	0	0
COX7C	1350	P15954	SHyEEGPGK	P15954-19	I	3	5	0	0	0	0	0	0	0	0	0	0	8	0	0	0	Mitochondrion inner membrane {ECO:0000250}.	0	0	1	0
ATP5J	522	P18859	RQTSGGPVDASSEyQQELER	P18859-67	I	11	9	7	0	0	0	0	0	0	0	0	0	27	0	0	0	Mitochondrion. Mitochondrion inner membrane.	0	0	1	0
COX5A	9377	P20674	WVTyFNKPDIDAWELR	P20674-59	I	0	1	3	0	0	0	0	0	0	0	0	0	4	0	0	0	Mitochondrion inner membrane.	1	0	1	0
COX5A	9377	P20674	GINTLVTyDMVPEPK	P20674-80	I	6	10	2	0	0	0	0	0	0	0	0	0	18	0	0	0	Mitochondrion inner membrane.	1	1	1	0
MUT	4594	P22033	AGQQGLSVAFDLATHRGyDSDNPR	P22033-146	I	2	0	1	0	0	0	0	0	0	0	0	0	3	0	0	0	Mitochondrion matrix.	1	0	0	0
HNRNPA2B1	3181	P22626	GFGDGyNGYGGGPGGGNFGGSPGYGGGR	P22626-244	I	1	0	1	0	0	0	0	0	0	0	0	0	2	0	0	0	Nucleus, nucleoplasm {ECO:0000269|PubMed:17289661}. Cytoplasm {ECO:0000269|PubMed:17289661}. Note=Localized in cytoplasmic mRNP granules containing untranslated mRNAs. Component of ribonucleosomes. Predominantly nucleoplasmic, however isoform A2 is also found in the cytoplasm of cells in some tissues. Not found in the nucleolus.	0	0	0	0
UQCRC2	7385	P22695	LPNGLVIASLENySPVSR	P22695-55	I	2	0	2	0	0	0	0	0	0	0	0	0	4	0	0	0	Mitochondrion inner membrane; Peripheral membrane protein; Matrix side.	1	1	0	0
ME2	4200	P23368	yIyIMGIQER	P23368-82	I	2	1	0	0	0	0	0	0	0	0	0	0	3	0	0	0	Mitochondrion matrix.	1	0	0	0
ME2	4200	P23368	YIyIMGIQER	P23368-84	I	5	4	1	0	0	0	0	0	0	0	0	0	10	0	0	0	Mitochondrion matrix.	1	0	0	0
ME2	4200	P23368	ILGLGDLGVyGMGIPVGK	P23368-175	I	1	1	0	0	0	0	0	0	0	0	0	0	2	0	0	0	Mitochondrion matrix.	1	0	0	0
ACAT1	38	P24752	GSTPyGGVKLEDLIVK	P24752-170	I	2	0	1	0	0	0	0	0	0	0	0	0	3	0	0	0	Mitochondrion.	1	1	0	0
ACAT1	38	P24752	NEQDAYAINSyTR	P24752-219	I	1	2	0	0	0	0	0	0	0	0	0	0	3	0	0	0	Mitochondrion.	1	0	0	0
ACAT1	38	P24752	IVAFADAAVEPIDFPIAPVyAASMVLK	P24752-331	I	4	0	1	0	0	0	0	0	0	0	0	0	5	0	0	0	Mitochondrion.	1	0	0	0
ATP5A1	498	P25705	LELAQyREVAAFAQFGSDLDAATQQLLSR	P25705-440	I	2	1	4	0	0	0	0	0	0	0	0	0	7	0	0	0	Mitochondrion inner membrane. Cell membrane; Peripheral membrane protein; Extracellular side. Note=Colocalizes with HRG on the cell surface of T-cells.	1	1	0	0
ATP5A1	498	P25705	LTELLKQGQySPMAIEEQVAVIYAGVR	P25705-476	I	10	2	3	0	0	0	0	0	0	0	0	0	15	0	0	0	Mitochondrion inner membrane. Cell membrane; Peripheral membrane protein; Extracellular side. Note=Colocalizes with HRG on the cell surface of T-cells.	1	1	0	0
C21orf33	8209	P30042	GVEVTVGHEQEEGGKWPyAGTAEAIK	P30042-206	I	2	0	7	0	0	0	0	0	0	0	0	0	9	0	0	0	.	1	1	0	0
PRDX3	10935	P30048	AFQyVETHGEVcPANWTPDSPTIKPSPAASK	P30048-221	I	2	0	4	0	0	0	0	0	0	0	0	0	6	0	0	0	Mitochondrion.	1	1	1	0
PRDX3	10935	P30048	AFQYVETHGEVcPANWTPDSPTIKPSPAASKEyFQK	P30048-250	I	1	0	3	0	0	0	0	0	0	0	0	0	4	0	0	0	Mitochondrion.	1	0	1	0
ALDH1B1	219	P30837	VLGyIQLGQK	P30837-373	I	1	1	0	0	0	0	0	0	0	0	0	0	2	0	0	0	Mitochondrion matrix.	1	1	0	0
SDHA	6389	P31040	TLNEADcATVPPAIRSy	P31040-664	I	1	0	1	0	0	0	0	0	0	0	0	0	2	0	0	0	Mitochondrion inner membrane; Peripheral membrane protein; Matrix side.	1	0	0	0
UQCRC1	7384	P31930	EVESMGAHLNAySTR	P31930-123	I	2	2	2	0	0	0	0	0	0	0	0	0	6	0	0	0	Mitochondrion inner membrane.	1	0	0	0
UQCRC1	7384	P31930	HLGGIPWTyAEDAVPTLTPcR	P31930-257	I	7	1	1	0	0	0	0	0	0	0	0	0	9	0	0	0	Mitochondrion inner membrane.	1	1	0	0
SHMT2	6472	P34897	yYGGAEVVDEIELLcQR	P34897-105	I	4	3	0	0	0	0	0	0	0	0	0	0	7	0	0	0	Mitochondrion. Mitochondrion matrix, mitochondrion nucleoid. Mitochondrion inner membrane.	1	1	0	0
HSPA9	3313	P38646	RQAVTNPNNTFyATKR	P38646-118	I	8	4	1	0	0	0	0	0	0	0	0	0	13	0	0	0	Mitochondrion {ECO:0000269|PubMed:22002106}. Nucleus, nucleolus {ECO:0000269|PubMed:22002106}.	1	1	0	0
HSPA9	3313	P38646	LySPSQIGAFVLMK	P38646-161	I	0	5	3	0	0	0	0	0	0	0	0	0	8	0	0	0	Mitochondrion {ECO:0000269|PubMed:22002106}. Nucleus, nucleolus {ECO:0000269|PubMed:22002106}.	1	1	0	0
HSPA9	3313	P38646	NAVITVPAyFNDSQR	P38646-196	I	1	2	0	0	0	0	0	0	0	0	0	0	3	0	0	0	Mitochondrion {ECO:0000269|PubMed:22002106}. Nucleus, nucleolus {ECO:0000269|PubMed:22002106}.	1	0	0	0
HSPA9	3313	P38646	cELSSSVQTDINLPyLTMDSSGPK	P38646-331	I	6	0	5	0	0	0	0	0	0	0	0	0	11	0	0	0	Mitochondrion {ECO:0000269|PubMed:22002106}. Nucleus, nucleolus {ECO:0000269|PubMed:22002106}.	1	0	0	0
HSPA9	3313	P38646	NAEKyAEEDR	P38646-568	I	4	1	0	0	0	0	0	0	0	0	0	0	5	0	0	0	Mitochondrion {ECO:0000269|PubMed:22002106}. Nucleus, nucleolus {ECO:0000269|PubMed:22002106}.	1	1	0	0
HSPA9	3313	P38646	LFEMAyKK	P38646-652	I	2	0	2	0	0	0	0	0	0	0	0	0	4	0	0	0	Mitochondrion {ECO:0000269|PubMed:22002106}. Nucleus, nucleolus {ECO:0000269|PubMed:22002106}.	1	1	0	0
MDH2	4191	P40926	HGVyNPNKIFGVTTLDIVR	P40926-161	I	0	1	1	0	0	0	0	0	0	0	0	0	2	0	0	0	Mitochondrion matrix.	1	1	0	0
HADHA	3030	P40939	THINyGVKGDVAVVR	P40939-43	I	1	0	3	0	0	0	0	0	0	0	0	0	4	0	0	0	Mitochondrion.	1	0	0	0
LRPPRC	10128	P42704	LIASycNVGDIEGASK	P42704-207	I	1	0	1	0	0	0	0	0	0	0	0	0	2	0	0	0	Mitochondrion. Nucleus, nucleoplasm. Nucleus inner membrane. Nucleus outer membrane. Note=Seems to be predominantly mitochondrial.	1	0	0	0
LRPPRC	10128	P42704	LLMSEDyFTQAMEVK	P42704-1082	I	3	1	0	0	0	0	0	0	0	0	0	0	4	0	0	0	Mitochondrion. Nucleus, nucleoplasm. Nucleus inner membrane. Nucleus outer membrane. Note=Seems to be predominantly mitochondrial.	1	0	0	0
LRPPRC	10128	P42704	RDyLKEAVTTLK	P42704-1119	I	2	0	1	0	0	0	0	0	0	0	0	0	3	0	0	0	Mitochondrion. Nucleus, nucleoplasm. Nucleus inner membrane. Nucleus outer membrane. Note=Seems to be predominantly mitochondrial.	1	0	0	0
LRPPRC	10128	P42704	VIEPQyFGLAYLFR	P42704-1215	I	2	3	2	0	0	0	0	0	0	0	0	0	7	0	0	0	Mitochondrion. Nucleus, nucleoplasm. Nucleus inner membrane. Nucleus outer membrane. Note=Seems to be predominantly mitochondrial.	1	0	0	0
LRPPRC	10128	P42704	SyVSEKDVTSAK	P42704-1328	I	3	1	0	0	0	0	0	0	0	0	0	0	4	0	0	0	Mitochondrion. Nucleus, nucleoplasm. Nucleus inner membrane. Nucleus outer membrane. Note=Seems to be predominantly mitochondrial.	1	0	0	0
ATP5O	539	P48047	LVRPPVQVyGIEGR	P48047-35	I	14	14	9	0	0	0	0	0	0	0	0	0	37	0	0	0	Mitochondrion {ECO:0000250}. Mitochondrion inner membrane {ECO:0000250}.	1	1	0	0
ATP5O	539	P48047	VAASVLNPyVKR	P48047-82	I	7	4	1	0	0	0	0	0	0	0	0	0	12	0	0	0	Mitochondrion {ECO:0000250}. Mitochondrion inner membrane {ECO:0000250}.	1	1	0	0
TUFM	7284	P49411	LLDAVDTyIPVPAR	P49411-246	I	2	6	1	0	0	0	0	0	0	0	0	0	9	0	0	0	Mitochondrion.	1	1	0	0
HSPE1	3336	P61604	DGDILGKyVD	P61604-100	I	2	1	0	0	0	0	0	0	0	0	0	0	3	0	0	0	Mitochondrion matrix.	1	1	1	0
TFAM	7019	Q00059	SAyNVYVAER	Q00059-162	I	5	5	0	0	0	0	0	0	0	0	0	0	10	0	0	0	Mitochondrion. Mitochondrion matrix, mitochondrion nucleoid.	1	0	0	0
SSBP1	6742	Q04837	DVAyQYVK	Q04837-99	I	2	1	0	0	0	0	0	0	0	0	0	0	3	0	0	0	Mitochondrion {ECO:0000269|PubMed:18063578}. Mitochondrion matrix, mitochondrion nucleoid {ECO:0000269|PubMed:18063578}.	1	1	0	0
SSBP1	6742	Q04837	DVAYQyVKKGSR	Q04837-101	I	3	2	0	0	0	0	0	0	0	0	0	0	5	0	0	0	Mitochondrion {ECO:0000269|PubMed:18063578}. Mitochondrion matrix, mitochondrion nucleoid {ECO:0000269|PubMed:18063578}.	1	1	0	0
SSBP1	6742	Q04837	IDYGEyMDKNNVR	Q04837-119	I	8	4	1	0	0	0	0	0	0	0	0	0	13	0	0	0	Mitochondrion {ECO:0000269|PubMed:18063578}. Mitochondrion matrix, mitochondrion nucleoid {ECO:0000269|PubMed:18063578}.	1	1	0	0
GRSF1	2926	Q12849	SHVHHRyIELFLNScPK	Q12849-468	I	1	0	3	0	0	0	0	0	0	0	0	0	4	0	0	0	Cytoplasm. Mitochondrion matrix, mitochondrion nucleoid. Note=Forms granules that colocalize with foci of newly synthesized mtRNA next to mitochondrial nucleoids.	1	1	0	0
ECH1	1891	Q13011	DIITRyQETFNVIER	Q13011-149	I	8	5	1	0	0	0	0	0	0	0	0	0	14	0	0	0	Mitochondrion {ECO:0000250}. Peroxisome {ECO:0000250}.	1	1	0	0
ECH1	1891	Q13011	DHSVAESLNyVASWNMSMLQTQDLVK	Q13011-293	I	3	2	0	0	0	0	0	0	0	0	0	0	5	0	0	0	Mitochondrion {ECO:0000250}. Peroxisome {ECO:0000250}.	1	0	0	0
HADH	3033	Q16836	LLVPyLMEAIR	Q16836-226	I	2	2	1	0	0	0	0	0	0	0	0	0	5	0	0	0	Mitochondrion matrix.	1	0	0	0
HADH	3033	Q16836	LGAGyPmGPFELLDYVGLDTTK	Q16836-254	I	3	2	2	0	0	0	0	0	0	0	0	0	7	0	0	0	Mitochondrion matrix.	1	0	0	0
IMMT	10989	Q16891	ySTSGSSGLTTGK	Q16891-33	I	9	8	2	0	0	0	0	0	0	0	0	0	19	0	0	0	Mitochondrion inner membrane {ECO:0000269|PubMed:25764979, ECO:0000269|PubMed:25997101}; Single-pass membrane protein {ECO:0000255}. Mitochondrion {ECO:0000269|PubMed:25781180}.	0	0	0	0
GLRX5	51218	Q86SX6	LHGVRDyAAYNVLDDPELR	Q86SX6-85	I	6	1	4	0	0	0	0	0	0	0	0	0	11	0	0	0	Mitochondrion {ECO:0000250}.	1	0	0	0
GLRX5	51218	Q86SX6	DYAAyNVLDDPELR	Q86SX6-88	I	1	1	1	0	0	0	0	0	0	0	0	0	3	0	0	0	Mitochondrion {ECO:0000250}.	1	0	0	0
GADD45GIP1	90480	Q8TAE8	ELEAEEREWyPSLATMQESLR	Q8TAE8-93	I	0	3	2	0	0	0	0	0	0	0	0	0	5	0	0	0	Mitochondrion. Nucleus. Note=Using N-terminally tagged constructs, has been found in the nucleus (PubMed:12482659). C-terminally tagged constructs are targeted exclusively to mitochondria (PubMed:22453275). This discrepancy may be explained by masking of a potential N-terminal mitochondrial targeting signal by the tag (PubMed:22453275). {ECO:0000269|PubMed:12482659, ECO:0000269|PubMed:22453275}.	1	0	0	0
GADD45GIP1	90480	Q8TAE8	LQAEAQELLGyQVDPR	Q8TAE8-166	I	4	9	1	0	0	0	0	0	0	0	0	0	14	0	0	0	Mitochondrion. Nucleus. Note=Using N-terminally tagged constructs, has been found in the nucleus (PubMed:12482659). C-terminally tagged constructs are targeted exclusively to mitochondria (PubMed:22453275). This discrepancy may be explained by masking of a potential N-terminal mitochondrial targeting signal by the tag (PubMed:22453275). {ECO:0000269|PubMed:12482659, ECO:0000269|PubMed:22453275}.	1	1	0	0
USMG5	84833	Q96IX5	AGPESDAQyQFTGIK	Q96IX5-10	I	5	3	1	0	0	0	0	0	0	0	0	0	9	0	0	0	Mitochondrion membrane {ECO:0000250}; Single-pass membrane protein {ECO:0000250}.	0	0	0	0
USMG5	84833	Q96IX5	YFNSyTLTGR	Q96IX5-22	I	4	8	0	0	0	0	0	0	0	0	0	0	12	0	0	0	Mitochondrion membrane {ECO:0000250}; Single-pass membrane protein {ECO:0000250}.	0	0	0	0
NIPSNAP1	8508	Q9BPW8	GWDENVYyTVPLVR	Q9BPW8-262	I	4	2	2	0	0	0	0	0	0	0	0	0	8	0	0	0	0	1	1	0	0
NDUFAF3	25915	Q9BU61	LSPADDELyQR	Q9BU61-42	I	2	2	0	0	0	0	0	0	0	0	0	0	4	0	0	0	Nucleus {ECO:0000250}. Mitochondrion inner membrane {ECO:0000269|PubMed:19463981}.	0	0	0	0
NDUFAF3	25915	Q9BU61	EAAQAMyIDSYNSR	Q9BU61-59	I	6	1	0	0	0	0	0	0	0	0	0	0	7	0	0	0	Nucleus {ECO:0000250}. Mitochondrion inner membrane {ECO:0000269|PubMed:19463981}.	0	0	0	0
GRPEL1	80273	Q9HAV7	FDPyEHEALFHTPVEGK	Q9HAV7-173	I	7	4	10	0	0	0	0	0	0	0	0	0	21	0	0	0	Mitochondrion matrix.	1	1	0	0
MCCC2	64087	Q9HCC0	IFGyPVGIVGNNGVLFSESAK	Q9HCC0-365	I	4	3	2	0	0	0	0	0	0	0	0	0	9	0	0	0	Mitochondrion matrix {ECO:0000269|PubMed:11170888, ECO:0000269|PubMed:16023992}.	1	0	0	0
MCCC2	64087	Q9HCC0	NIPLLFLQNITGFMVGREyEAEGIAK	Q9HCC0-413	I	1	1	3	0	0	0	0	0	0	0	0	0	5	0	0	0	Mitochondrion matrix {ECO:0000269|PubMed:11170888, ECO:0000269|PubMed:16023992}.	1	0	0	0
ABHD10	55347	Q9NUJ1	SPGIIFIPGYLSyMNGTK	Q9NUJ1-87	I	0	1	1	0	0	0	0	0	0	0	0	0	2	0	0	0	Mitochondrion {ECO:0000305}.	1	1	1	0
ABHD10	55347	Q9NUJ1	YSEEGVyNVQYSFIK	Q9NUJ1-215	I	2	3	1	0	0	0	0	0	0	0	0	0	6	0	0	0	Mitochondrion {ECO:0000305}.	1	1	1	0
ATPIF1	93974	Q9UII2	EQAEEERyFR	Q9UII2-58	I	2	3	0	0	0	0	0	0	0	0	0	0	5	0	0	0	Mitochondrion {ECO:0000269|PubMed:12110673}.	1	1	0	0
STOML2	30968	Q9UJZ1	IMDPyKASYGVEDPEYAVTQLAQTTMR	Q9UJZ1-113	I	4	0	2	0	0	0	0	0	0	0	0	0	6	0	0	0	Mitochondrion inner membrane. Mitochondrion intermembrane space. Cell membrane; Peripheral membrane protein. Membrane raft; Peripheral membrane protein. Note=Behaves as an integral membrane protein of the mitochondrion despite the absence of a detectable transmembrane domain. A minor pool is associated with the plasma membrane and is enriched at the immunological synapse in activated T-cells. Als…	1	0	0	0
STOML2	30968	Q9UJZ1	ASYGVEDPEyAVTQLAQTTMR	Q9UJZ1-124	I	2	0	2	0	0	0	0	0	0	0	0	0	4	0	0	0	Mitochondrion inner membrane. Mitochondrion intermembrane space. Cell membrane; Peripheral membrane protein. Membrane raft; Peripheral membrane protein. Note=Behaves as an integral membrane protein of the mitochondrion despite the absence of a detectable transmembrane domain. A minor pool is associated with the plasma membrane and is enriched at the immunological synapse in activated T-cells. Als…	1	1	0	0
PDCD5	9141	O14737	AVENyLIQMAR	O14737-73	II	0	0	0	1	0	0	1	0	1	0	0	0	0	1	2	0	0	0	0	0	0
UQCRQ	27089	O14949	NPAAyENDK	O14949-78	II	0	0	0	0	2	0	2	2	0	0	0	0	0	2	4	0	Mitochondrion inner membrane.	1	0	1	1
HTRA2	27429	O43464	SQyNFIADVVEK	O43464-147	II	0	0	0	3	1	1	0	1	0	0	0	0	0	5	1	0	Mitochondrion intermembrane space. Mitochondrion membrane {ECO:0000305}; Single-pass membrane protein {ECO:0000305}. Note=Predominantly present in the intermembrane space. Released into the cytosol following apoptotic stimuli, such as UV treatment, and stimulation of mitochondria with caspase-8 truncated BID/tBID.	0	0	1	1
SCO2	9997	O43819	yVQDFHPR	O43819-180	II	0	0	0	3	0	0	4	1	0	0	0	0	0	3	5	0	Mitochondrion.	0	0	1	0
OPA1	4976	O60313-2	AAGQYSTSyAQQK	O60313-2-239	II	0	0	0	2	0	0	3	0	1	0	0	0	0	2	4	0	Mitochondrion inner membrane; Single-pass membrane protein. Mitochondrion intermembrane space.	0	0	1	0
TIMM17B	10245	O60830	NAPPFLEDPSQLPPKDGTPAPGyPSYQQYH	O60830-165	II	0	0	0	0	0	1	0	1	1	0	0	0	0	1	2	0	Mitochondrion inner membrane; Multi-pass membrane protein.	0	0	1	0
TIMM17B	10245	O60830	DGTPAPGYPSyQQYH	O60830-168	II	0	0	0	1	0	3	7	0	7	0	0	0	0	4	14	0	Mitochondrion inner membrane; Multi-pass membrane protein.	0	0	1	1
AIFM1	9131	O95831	ILPEyLSNWTMEK	O95831-347	II	0	0	0	1	0	1	2	0	0	0	0	0	0	2	2	0	Mitochondrion intermembrane space. Mitochondrion inner membrane. Cytoplasm. Nucleus. Cytoplasm, perinuclear region. Note=Proteolytic cleavage during or just after translocation into the mitochondrial intermembrane space (IMS) results in the formation of an inner-membrane-anchored mature form (AIFmit). During apoptosis, further proteolytic processing leads to a mature form, which is confined to th…	0	0	1	1
NDUFB10	4716	O96000	RDyKVDQEIINIMQDR	O96000-90	II	0	0	0	3	0	1	0	0	0	0	0	0	0	4	0	0	Mitochondrion inner membrane; Peripheral membrane protein; Matrix side.	1	0	0	0
NDUFB10	4716	O96000	EGQNyQQNcIK	O96000-115	II	0	0	0	0	0	4	1	2	1	0	0	0	0	4	4	0	Mitochondrion inner membrane; Peripheral membrane protein; Matrix side.	1	0	0	0
NDUFB10	4716	O96000	AYQDRyQDLGAYSSAR	O96000-137	II	0	0	0	0	0	1	1	0	1	0	0	0	0	1	2	0	Mitochondrion inner membrane; Peripheral membrane protein; Matrix side.	1	0	0	0
NDUFB10	4716	O96000	YQDLGAySSAR	O96000-143	II	0	0	0	4	1	0	1	5	1	0	0	0	0	5	7	0	Mitochondrion inner membrane; Peripheral membrane protein; Matrix side.	1	0	0	0
CYC1	1537	P08574	HLVGVcyTEDEAK	P08574-140	II	0	0	0	0	0	4	3	0	2	0	0	0	0	4	5	0	Mitochondrion inner membrane; Single-pass membrane protein; Intermembrane side.	1	0	1	1
CYC1	1537	P08574	LFDyFPKPYPNSEAAR	P08574-174	II	0	0	0	2	1	1	7	4	2	0	0	0	0	4	13	0	Mitochondrion inner membrane; Single-pass membrane protein; Intermembrane side.	1	0	1	1
CKMT1A	1159	P12532	LGyILTcPSNLGTGLR	P12532-312	II	0	0	0	4	4	6	5	3	4	0	0	0	0	14	12	0	Mitochondrion inner membrane; Peripheral membrane protein; Intermembrane side.	1	0	1	1
COX4I1	1327	P13073	HYVyGPLPQSFDK	P13073-126	II	0	0	0	1	0	2	2	0	1	0	0	0	0	3	3	0	Mitochondrion inner membrane.	1	0	1	0
VDAC1	7416	P21796	YRWTEyGLTFTEK	P21796-67	II	0	0	0	9	0	4	5	7	6	0	0	0	0	13	18	0	Mitochondrion outer membrane {ECO:0000269|PubMed:7539795}. Cell membrane {ECO:0000269|PubMed:7539795}.	0	0	1	1
PHB	5245	P35232	KLEAAEDIAyQLSR	P35232-249	II	0	0	0	4	9	5	5	9	7	0	0	0	0	18	21	0	Mitochondrion inner membrane {ECO:0000250}.	0	0	0	0
VDAC2	7417	P45880	NNFAVGyR	P45880-184	II	0	0	0	1	1	0	0	2	0	0	0	0	0	2	2	0	Mitochondrion outer membrane {ECO:0000269|PubMed:7539795}.	0	0	1	1
NDUFA8	4702	P51970	HcAEPFTEYWTcIDyTGQQLFR	P51970-91	II	0	0	0	4	2	4	3	3	4	0	0	0	0	10	10	0	Mitochondrion inner membrane {ECO:0000269|PubMed:21310150}; Peripheral membrane protein {ECO:0000269|PubMed:21310150}. Mitochondrion intermembrane space {ECO:0000269|PubMed:21310150}.	0	0	1	0
NDUFA8	4702	P51970	TDRPLPENPyHSRPRPDPSPEIEGDLQPATHGSR	P51970-142	II	0	0	0	0	0	1	0	2	5	0	0	0	0	1	7	0	Mitochondrion inner membrane {ECO:0000269|PubMed:21310150}; Peripheral membrane protein {ECO:0000269|PubMed:21310150}. Mitochondrion intermembrane space {ECO:0000269|PubMed:21310150}.	0	0	1	1
HCCS	3052	P53701	AyEYVEcPIR	P53701-61	II	0	0	0	3	0	1	1	0	0	0	0	0	0	4	1	0	Mitochondrion inner membrane {ECO:0000305}.	0	0	1	1
HCCS	3052	P53701	AYEyVEcPIR	P53701-63	II	0	0	0	1	0	3	2	0	3	0	0	0	0	4	5	0	Mitochondrion inner membrane {ECO:0000305}.	0	0	1	1
ROMO1	140823	P60602	pVAVGPyGQSQPScFDR	P60602-8	II	0	0	0	2	1	3	1	1	0	0	0	0	0	6	2	0	Mitochondrion inner membrane {ECO:0000269|PubMed:16842742, ECO:0000269|PubMed:19535734}; Single-pass membrane protein {ECO:0000269|PubMed:16842742, ECO:0000269|PubMed:19535734}.	0	0	1	1
CNBP	7555	P62633	TSEVNcyRcGESGHLAR	P62633-159	II	0	0	0	0	0	2	1	6	1	0	0	0	0	2	8	0	Cytoplasm {ECO:0000250}. Endoplasmic reticulum {ECO:0000250}.	0	0	0	0
EEF1A1	1915	P68104	EHALLAyTLGVK	P68104-141	II	0	0	0	2	1	0	2	3	0	0	0	0	0	3	5	0	Cytoplasm. Nucleus. Nucleus, nucleolus. Note=Colocalizes with DLC1 at actin-rich regions in the cell periphery. Translocates together with ZPR1 from the cytoplasm to the nucleus and nucleolus after treatment with mitogens.	0	0	0	0
CYCS	54205	P99999	TGQAPGySYTAANK	P99999-47	II	0	0	0	0	1	1	0	0	2	0	0	0	0	2	2	0	Mitochondrion intermembrane space. Note=Loosely associated with the inner membrane.	0	0	1	0
CYCS	54205	P99999	TGQAPGYSyTAANK	P99999-49	II	0	0	0	1	0	1	2	2	1	0	0	0	0	2	5	0	Mitochondrion intermembrane space. Note=Loosely associated with the inner membrane.	0	0	1	1
IMMT	10989	Q16891	LFEMVLGPAAyNVPLPK	Q16891-95	II	0	0	0	7	0	1	7	0	1	0	0	0	0	8	8	0	Mitochondrion inner membrane {ECO:0000269|PubMed:25764979, ECO:0000269|PubMed:25997101}; Single-pass membrane protein {ECO:0000255}. Mitochondrion {ECO:0000269|PubMed:25781180}.	0	0	0	0
IMMT	10989	Q16891	VVSQyHELVVQAR	Q16891-358	II	0	0	0	6	0	4	7	5	4	0	0	0	0	10	16	0	Mitochondrion inner membrane {ECO:0000269|PubMed:25764979, ECO:0000269|PubMed:25997101}; Single-pass membrane protein {ECO:0000255}. Mitochondrion {ECO:0000269|PubMed:25781180}.	0	0	0	0
TIMM50	92609	Q3ZCQ8	TVLEHyALEDDPLAAFK	Q3ZCQ8-301	II	0	0	0	2	0	1	6	2	2	0	0	0	0	3	10	0	Mitochondrion inner membrane {ECO:0000269|PubMed:15044455, ECO:0000269|PubMed:16008839}; Single-pass membrane protein {ECO:0000269|PubMed:15044455, ECO:0000269|PubMed:16008839}.; SUBCELLULAR LOCATION: Isoform 2: Nucleus speckle. Note=Nuclear and enriched in speckles with snRNPs.	0	0	1	1
AGK	55750	Q53H12	LASyWAQPQDALSQEVSPEVWK	Q53H12-286	II	0	0	0	2	0	1	2	0	1	0	0	0	0	3	3	0	Mitochondrion membrane {ECO:0000269|PubMed:15939762, ECO:0000269|PubMed:16269826}.	0	0	1	1
TTC19	54902	Q6DKK2	LASIyAAQNR	Q6DKK2-189	II	0	0	0	3	0	0	2	3	0	0	0	0	0	3	5	0	Mitochondrion inner membrane. Cytoplasm, cytoskeleton, microtubule organizing center, centrosome. Midbody. Note=According to some authors, localizes to the centrosome during all stages of the cell cycle and is recruited to the midbody during cytokinesis (PubMed:20208530). However, the midbody localization could not be confirmed by others (PubMed:21278747). {ECO:0000269|PubMed:20208530, ECO:000026…	0	0	1	1
PHB2	11331	Q99623	LLLGAGAVAyGVR	Q99623-34	II	0	0	0	2	2	0	1	3	0	0	0	0	0	4	4	0	Mitochondrion inner membrane {ECO:0000250}. Cytoplasm {ECO:0000250}. Nucleus {ECO:0000250}. Note=Also cytoplasmic and nuclear. {ECO:0000250}.	0	0	0	0
PHB2	11331	Q99623	IPWFQyPIIYDIR	Q99623-77	II	0	0	0	1	3	0	0	2	0	0	0	0	0	4	2	0	Mitochondrion inner membrane {ECO:0000250}. Cytoplasm {ECO:0000250}. Nucleus {ECO:0000250}. Note=Also cytoplasmic and nuclear. {ECO:0000250}.	0	0	0	0
PHB2	11331	Q99623	VLSRPNAQELPSMyQR	Q99623-121	II	0	0	0	2	2	3	3	2	3	0	0	0	0	7	8	0	Mitochondrion inner membrane {ECO:0000250}. Cytoplasm {ECO:0000250}. Nucleus {ECO:0000250}. Note=Also cytoplasmic and nuclear. {ECO:0000250}.	0	0	0	0
APOO	79135	Q9BUR5	VDELSLYSVPEGQSKyVEEAR	Q9BUR5-52	II	0	0	0	0	0	3	1	3	6	0	0	0	0	3	10	0	Mitochondrion inner membrane {ECO:0000269|PubMed:25764979}; Single-pass membrane protein {ECO:0000255}. Secreted {ECO:0000269|PubMed:16956892, ECO:0000269|PubMed:25764979}. Mitochondrion {ECO:0000269|PubMed:25781180}. Golgi apparatus membrane {ECO:0000269|PubMed:25764979}. Endoplasmic reticulum membrane {ECO:0000269|PubMed:25764979}. Note=Exists in three distinct forms: a glycosylated and secrete…	0	0	1	1
CLPB	81570	Q9H078	FIGSPPGyVGHEEGGQLTK	Q9H078-430	II	0	0	0	1	0	1	1	0	2	0	0	0	0	2	3	0	Mitochondrion {ECO:0000269|PubMed:25597510}.	0	0	1	1
CLPB	81570	Q9H078	INEIVyFLPFcHSELIQLVNK	Q9H078-567	II	0	0	0	1	0	0	0	0	0	0	0	0	0	1	0	0	Mitochondrion {ECO:0000269|PubMed:25597510}.	0	0	1	0
GHITM	27069	Q9H3K2	RAEVSPMyGVQK	Q9H3K2-308	II	0	0	0	5	0	1	8	0	6	0	0	0	0	6	14	0	Mitochondrion inner membrane {ECO:0000269|PubMed:18417609}; Multi-pass membrane protein {ECO:0000269|PubMed:18417609}.	0	0	1	0
PTGES2	80142	Q9H7Z7	TYLVSGQPLEEIITyYPAMK	Q9H7Z7-188	II	0	0	0	4	0	0	3	0	2	0	0	0	0	4	5	0	Golgi apparatus membrane {ECO:0000269|PubMed:12835322}; Single-pass membrane protein {ECO:0000269|PubMed:12835322}.; SUBCELLULAR LOCATION: Prostaglandin E synthase 2 truncated form: Cytoplasm, perinuclear region. Note=Synthesized as a Golgi membrane-bound protein, which is further cleaved into the predominant soluble truncated form. The truncated form is cytoplasmic and is enriched in the perinuc…	1	0	1	1
PTGES2	80142	Q9H7Z7	TYLVSGQPLEEIITYyPAMK	Q9H7Z7-189	II	0	0	0	6	0	1	3	0	2	0	0	0	0	7	5	0	Golgi apparatus membrane {ECO:0000269|PubMed:12835322}; Single-pass membrane protein {ECO:0000269|PubMed:12835322}.; SUBCELLULAR LOCATION: Prostaglandin E synthase 2 truncated form: Cytoplasm, perinuclear region. Note=Synthesized as a Golgi membrane-bound protein, which is further cleaved into the predominant soluble truncated form. The truncated form is cytoplasmic and is enriched in the perinuc…	1	0	1	1
PTGES2	80142	Q9H7Z7	TPTEALASFDyIVR	Q9H7Z7-263	II	0	0	0	1	1	2	0	0	2	0	0	0	0	4	2	0	Golgi apparatus membrane {ECO:0000269|PubMed:12835322}; Single-pass membrane protein {ECO:0000269|PubMed:12835322}.; SUBCELLULAR LOCATION: Prostaglandin E synthase 2 truncated form: Cytoplasm, perinuclear region. Note=Synthesized as a Golgi membrane-bound protein, which is further cleaved into the predominant soluble truncated form. The truncated form is cytoplasmic and is enriched in the perinuc…	1	0	1	1
TIMMDC1	51300	Q9NPL8	RLPyVPEPYYPESGWDR	Q9NPL8-44	II	0	0	0	0	0	5	8	1	4	0	0	0	0	5	13	0	Mitochondrion membrane {ECO:0000269|PubMed:24191001}; Multi-pass membrane protein {ECO:0000269|PubMed:24191001}.	1	0	1	1
STARD7	56910	Q9NQZ5	VFGTyTDVTPR	Q9NQZ5-171	II	0	0	0	1	0	0	0	1	1	0	0	0	0	1	2	0	Mitochondrion {ECO:0000305}.	0	0	1	0
DIABLO	56616	Q9NR28	AVyTLTSLYR	Q9NR28-108	II	0	0	0	4	1	0	1	3	0	0	0	0	0	5	4	0	Mitochondrion {ECO:0000269|PubMed:14523016}. Note=Released into the cytosol when cells undergo apoptosis.	0	0	1	1
DIABLO	56616	Q9NR28	AVYTLTSLyRQYTSLLGK	Q9NR28-114	II	0	0	0	2	3	0	2	3	2	0	0	0	0	5	7	0	Mitochondrion {ECO:0000269|PubMed:14523016}. Note=Released into the cytosol when cells undergo apoptosis.	0	0	1	1
DIABLO	56616	Q9NR28	LETTWMTAVGLSEMAAEAAyQTGADQASITAR	Q9NR28-172	II	0	0	0	3	0	0	0	0	0	0	0	0	0	3	0	0	Mitochondrion {ECO:0000269|PubMed:14523016}. Note=Released into the cytosol when cells undergo apoptosis.	0	0	1	0
DIABLO	56616	Q9NR28	TQEEGEERAESEQEAyLRED	Q9NR28-235	II	0	0	0	11	6	14	15	10	4	0	0	0	0	31	29	0	Mitochondrion {ECO:0000269|PubMed:14523016}. Note=Released into the cytosol when cells undergo apoptosis.	0	0	1	1
OCIAD1	54940	Q9NX40	NITyEELR	Q9NX40-199	II	0	0	0	2	0	0	2	4	0	0	0	0	0	2	6	0	Endosome {ECO:0000250}.	0	0	1	1
OCIAD1	54940	Q9NX40	NRESyEVSLTQK	Q9NX40-210	II	0	0	0	5	1	1	5	1	2	0	0	0	0	7	8	0	Endosome {ECO:0000250}.	0	0	1	1
CHCHD3	54927	Q9NX63	SQRySGAYGASVSDEELK	Q9NX63-49	II	0	0	0	10	2	10	10	5	12	0	0	0	0	22	27	0	Mitochondrion inner membrane {ECO:0000250|UniProtKB:Q9CRB9}; Lipid-anchor {ECO:0000250|UniProtKB:Q9CRB9}; Intermembrane side {ECO:0000250|UniProtKB:Q9CRB9}. Cytoplasm {ECO:0000269|PubMed:22567091}. Nucleus {ECO:0000269|PubMed:22567091}. Mitochondrion {ECO:0000269|PubMed:25781180, ECO:0000269|PubMed:25997101}.	1	0	1	1
CHCHD3	54927	Q9NX63	YSGAyGASVSDEELK	Q9NX63-53	II	0	0	0	11	7	6	11	9	9	0	0	0	0	24	29	0	Mitochondrion inner membrane {ECO:0000250|UniProtKB:Q9CRB9}; Lipid-anchor {ECO:0000250|UniProtKB:Q9CRB9}; Intermembrane side {ECO:0000250|UniProtKB:Q9CRB9}. Cytoplasm {ECO:0000269|PubMed:22567091}. Nucleus {ECO:0000269|PubMed:22567091}. Mitochondrion {ECO:0000269|PubMed:25781180, ECO:0000269|PubMed:25997101}.	1	0	1	1
CHCHD3	54927	Q9NX63	KQDAFyKEQLAR	Q9NX63-141	II	0	0	0	0	0	1	0	0	0	0	0	0	0	1	0	0	Mitochondrion inner membrane {ECO:0000250|UniProtKB:Q9CRB9}; Lipid-anchor {ECO:0000250|UniProtKB:Q9CRB9}; Intermembrane side {ECO:0000250|UniProtKB:Q9CRB9}. Cytoplasm {ECO:0000269|PubMed:22567091}. Nucleus {ECO:0000269|PubMed:22567091}. Mitochondrion {ECO:0000269|PubMed:25781180, ECO:0000269|PubMed:25997101}.	1	0	1	1
CHCHD3	54927	Q9NX63	SSEFyRVTTEQYQK	Q9NX63-156	II	0	0	0	3	0	4	5	7	10	0	0	0	0	7	22	0	Mitochondrion inner membrane {ECO:0000250|UniProtKB:Q9CRB9}; Lipid-anchor {ECO:0000250|UniProtKB:Q9CRB9}; Intermembrane side {ECO:0000250|UniProtKB:Q9CRB9}. Cytoplasm {ECO:0000269|PubMed:22567091}. Nucleus {ECO:0000269|PubMed:22567091}. Mitochondrion {ECO:0000269|PubMed:25781180, ECO:0000269|PubMed:25997101}.	1	0	1	0
CHCHD3	54927	Q9NX63	VTTEQyQKAAEEVEAK	Q9NX63-163	II	0	0	0	2	2	0	2	0	5	0	0	0	0	4	7	0	Mitochondrion inner membrane {ECO:0000250|UniProtKB:Q9CRB9}; Lipid-anchor {ECO:0000250|UniProtKB:Q9CRB9}; Intermembrane side {ECO:0000250|UniProtKB:Q9CRB9}. Cytoplasm {ECO:0000269|PubMed:22567091}. Nucleus {ECO:0000269|PubMed:22567091}. Mitochondrion {ECO:0000269|PubMed:25781180, ECO:0000269|PubMed:25997101}.	1	0	1	1
CHCHD3	54927	Q9NX63	FKRyESHPVcADLQAK	Q9NX63-177	II	0	0	0	2	1	4	1	3	7	0	0	0	0	7	11	0	Mitochondrion inner membrane {ECO:0000250|UniProtKB:Q9CRB9}; Lipid-anchor {ECO:0000250|UniProtKB:Q9CRB9}; Intermembrane side {ECO:0000250|UniProtKB:Q9CRB9}. Cytoplasm {ECO:0000269|PubMed:22567091}. Nucleus {ECO:0000269|PubMed:22567091}. Mitochondrion {ECO:0000269|PubMed:25781180, ECO:0000269|PubMed:25997101}.	1	0	1	1
TIMM10B	26515	Q9Y5J6	IADyEAASAVPGVAAEQPGVSPSGS	Q9Y5J6-82	II	0	0	0	4	0	5	7	3	6	0	0	0	0	9	16	0	Mitochondrion inner membrane {ECO:0000269|PubMed:11489896, ECO:0000269|PubMed:14726512}; Peripheral membrane protein {ECO:0000269|PubMed:11489896, ECO:0000269|PubMed:14726512}.	0	0	1	1
TIMM13	26517	Q9Y5L4	YMDAWNTVSRAyNSR	Q9Y5L4-84	II	0	0	0	4	0	5	6	0	0	0	0	0	0	9	6	0	Mitochondrion inner membrane {ECO:0000269|PubMed:11489896}; Peripheral membrane protein {ECO:0000269|PubMed:11489896}; Intermembrane side {ECO:0000269|PubMed:11489896}.	0	0	1	0
RBM3	5935	P98179	YYDSRPGGYGyGYGR	P98179-127	II	0	0	0	0	0	1	0	1	1	0	0	0	0	1	2	0	Nucleus {ECO:0000250}. Cytoplasm {ECO:0000250}. Cell projection, dendrite {ECO:0000250}. Note=Localizes in mRNA granules in dentrites. {ECO:0000250}.	0	0	0	0
ENO1	2023	P06733	AAVPSGASTGIyEALELR	P06733-44	III	0	0	0	0	2	1	0	0	0	0	0	0	0	3	0	0	Cytoplasm {ECO:0000269|PubMed:10802057}. Cell membrane {ECO:0000269|PubMed:10802057}. Cytoplasm, myofibril, sarcomere, M line {ECO:0000269|PubMed:10802057}. Note=Can translocate to the plasma membrane in either the homodimeric (alpha/alpha) or heterodimeric (alpha/gamma) form. ENO1 is localized to the M line.; SUBCELLULAR LOCATION: Isoform MBP-1: Nucleus.	0	0	0	0
HSPA1A	3303	P0DMV8	SINPDEAVAyGAAVQAAILMGDK	P0DMV8-371	III	0	0	0	1	3	0	0	0	0	0	0	0	0	4	0	0	Cytoplasm {ECO:0000269|PubMed:17289661}. Note=Localized in cytoplasmic mRNP granules containing untranslated mRNAs.	0	0	0	0
VDAC2	7417	P45880	WcEyGLTFTEK	P45880-78	III	0	0	0	2	0	1	0	0	0	0	0	0	0	3	0	0	Mitochondrion outer membrane {ECO:0000269|PubMed:7539795}.	0	0	1	1
COX6B1	1340	P14854	IKNyKTAPFDSR	P14854-12	III	0	0	0	0	0	0	2	0	7	0	0	0	0	0	9	0	Mitochondrion intermembrane space {ECO:0000250}.	0	0	1	0
COX6B1	1340	P14854	NcWQNyLDFHR	P14854-34	III	0	0	0	0	0	0	1	0	1	0	0	0	0	0	2	0	Mitochondrion intermembrane space {ECO:0000250}.	0	0	1	0
AK2	204	P54819	APSVPAAEPEyPKGIR	P54819-12	III	0	0	0	0	0	0	0	2	2	0	0	0	0	0	4	0	Mitochondrion intermembrane space.	1	0	1	1
ATP5I	521	P56385	YSALFLGVAYGATRYNyLKPR	P56385-32	III	0	0	0	0	0	0	0	0	1	0	0	0	0	0	1	0	Mitochondrion. Mitochondrion inner membrane.	0	0	1	0
HIGD2A	192286	Q9BW72	aTPGPVIPEVPFEPSKPPVIEGLSPTVyRNPESFK	Q9BW72-29	III	0	0	0	0	0	0	0	0	3	0	0	0	0	0	3	0	Mitochondrion membrane {ECO:0000255|PROSITE-ProRule:PRU00836, ECO:0000269|PubMed:22342701}; Multi-pass membrane protein {ECO:0000255|PROSITE-ProRule:PRU00836, ECO:0000269|PubMed:22342701}. Mitochondrion inner membrane {ECO:0000305|PubMed:22342701}.	0	0	1	1
DIABLO	56616	Q9NR28	AVYTLTSLYRQyTSLLGK	Q9NR28-117	III	0	0	0	0	0	0	0	0	2	0	0	0	0	0	2	0	Mitochondrion {ECO:0000269|PubMed:14523016}. Note=Released into the cytosol when cells undergo apoptosis.	0	0	1	0
HIGD1A	25994	Q9Y241	sTDTGVSLPSyEEDQGSK	Q9Y241-12	III	0	0	0	0	0	0	0	0	1	0	0	0	0	0	1	0	Mitochondrion membrane {ECO:0000255|PROSITE-ProRule:PRU00836, ECO:0000269|PubMed:22342701}; Multi-pass membrane protein {ECO:0000255|PROSITE-ProRule:PRU00836, ECO:0000269|PubMed:22342701}. Mitochondrion inner membrane {ECO:0000305|PubMed:22342701}.	0	0	1	1
SCO1	6341	O75880	EAIANyVKEFSPK	O75880-216	III	0	0	0	0	0	0	11	6	1	0	0	0	0	0	18	0	Mitochondrion {ECO:0000269|PubMed:9878253}.	1	0	1	0
SCO1	6341	O75880	KGEIAASIATHMRPyR	O75880-297	III	0	0	0	0	0	0	7	4	11	0	0	0	0	0	22	0	Mitochondrion {ECO:0000269|PubMed:9878253}.	1	0	1	0
SCO1	6341	O75880	AYRVyYSPGPK	O75880-244	III	0	0	0	0	0	0	6	4	1	0	0	0	0	0	11	0	Mitochondrion {ECO:0000269|PubMed:9878253}.	1	0	1	0
ALDOA	226	P04075	YTPSGQAGAAASESLFVSNHAy	P04075-364	IV	9	3	2	8	20	6	8	7	6	0	0	0	14	34	21	0	Cytoplasm, myofibril, sarcomere, I band. Cytoplasm, myofibril, sarcomere, M line. Note=In skeletal muscle, accumulates around the M line and within the I band, colocalizing with FBP2 on both sides of the Z line in the absence of Ca(2+). {ECO:0000250}.	0	0	0	0
PFN1	5216	P07737	SSFyVNGLTLGGQK	P07737-60	IV	2	0	0	3	6	3	4	2	0	0	0	0	2	12	6	0	Cytoplasm, cytoskeleton.	0	0	0	0
HSP90AA1	3320	P07900	LVTSPccIVTSTyGWTANMER	P07900-604	IV	0	0	0	2	1	1	2	0	1	0	0	0	0	4	3	0	Cytoplasm. Melanosome. Cell membrane. Note=Identified by mass spectrometry in melanosome fractions from stage I to stage IV.	0	0	0	0
HSP90AA1	3320	P07900	DNSTMGyMAAK	P07900-627	IV	2	0	0	0	1	0	3	2	0	0	0	0	2	1	5	0	Cytoplasm. Melanosome. Cell membrane. Note=Identified by mass spectrometry in melanosome fractions from stage I to stage IV.	0	0	0	0
HNRNPA1	3178	P09651	SSGPyGGGGQYFAKPR	P09651-341	IV	4	2	0	0	2	0	0	2	0	0	0	0	6	2	2	0	Nucleus. Cytoplasm. Note=Localized in cytoplasmic mRNP granules containing untranslated mRNAs. Shuttles continuously between the nucleus and the cytoplasm along with mRNA. Component of ribonucleosomes. In the course of viral infection, colocalizes with HCV NS5B at speckles in the cytoplasm in a HCV-replication dependent manner.	0	0	0	0
HNRNPA1	3178	P09651	NQGGyGGSSSSSSYGSGR	P09651-357	IV	3	6	1	0	5	1	4	5	0	0	0	0	10	6	9	0	Nucleus. Cytoplasm. Note=Localized in cytoplasmic mRNP granules containing untranslated mRNAs. Shuttles continuously between the nucleus and the cytoplasm along with mRNA. Component of ribonucleosomes. In the course of viral infection, colocalizes with HCV NS5B at speckles in the cytoplasm in a HCV-replication dependent manner.	0	0	0	0
HNRNPA1	3178	P09651	NQGGYGGSSSSSSyGSGR	P09651-366	IV	5	2	2	3	4	2	4	3	4	0	0	0	9	9	11	0	Nucleus. Cytoplasm. Note=Localized in cytoplasmic mRNP granules containing untranslated mRNAs. Shuttles continuously between the nucleus and the cytoplasm along with mRNA. Component of ribonucleosomes. In the course of viral infection, colocalizes with HCV NS5B at speckles in the cytoplasm in a HCV-replication dependent manner.	0	0	0	0
HSPA1A	3303	P0DMV8	ELEQVcNPIISGLyQGAGGPGPGGFGAQGPK	P0DMV8-611	IV	1	0	1	3	0	1	2	1	2	0	0	0	2	4	5	0	Cytoplasm {ECO:0000269|PubMed:17289661}. Note=Localized in cytoplasmic mRNP granules containing untranslated mRNAs.	0	0	0	0
HNRNPL	3191	P14866	MAAAGGGGGGGRYyGGGSEGGR	P14866-48	IV	1	0	2	0	0	0	0	1	0	0	0	0	3	0	1	0	Nucleus, nucleoplasm {ECO:0000269|PubMed:17289661}. Cytoplasm {ECO:0000269|PubMed:17289661}. Note=Localized in cytoplasmic mRNP granules containing untranslated mRNAs.	0	0	0	0
HNRNPA2B1	3181	P22626	GGSDGyGSGR	P22626-234	IV	1	3	0	0	3	0	0	3	0	0	0	0	4	3	3	0	Nucleus, nucleoplasm {ECO:0000269|PubMed:17289661}. Cytoplasm {ECO:0000269|PubMed:17289661}. Note=Localized in cytoplasmic mRNP granules containing untranslated mRNAs. Component of ribonucleosomes. Predominantly nucleoplasmic, however isoform A2 is also found in the cytoplasm of cells in some tissues. Not found in the nucleolus.	0	0	0	0
HNRNPA2B1	3181	P22626	NmGGPyGGGNYGPGGSGGSGGYGGR	P22626-331	IV	7	3	0	0	3	1	1	2	0	0	0	0	10	4	3	0	Nucleus, nucleoplasm {ECO:0000269|PubMed:17289661}. Cytoplasm {ECO:0000269|PubMed:17289661}. Note=Localized in cytoplasmic mRNP granules containing untranslated mRNAs. Component of ribonucleosomes. Predominantly nucleoplasmic, however isoform A2 is also found in the cytoplasm of cells in some tissues. Not found in the nucleolus.	0	0	0	0
HNRNPA2B1	3181	P22626	NMGGPYGGGNyGPGGSGGSGGYGGR	P22626-336	IV	6	4	0	1	2	1	3	0	0	0	0	0	10	4	3	0	Nucleus, nucleoplasm {ECO:0000269|PubMed:17289661}. Cytoplasm {ECO:0000269|PubMed:17289661}. Note=Localized in cytoplasmic mRNP granules containing untranslated mRNAs. Component of ribonucleosomes. Predominantly nucleoplasmic, however isoform A2 is also found in the cytoplasm of cells in some tissues. Not found in the nucleolus.	0	0	0	0
HNRNPA2B1	3181	P22626	NMGGPYGGGNYGPGGSGGSGGyGGR	P22626-347	IV	12	7	1	1	2	0	1	7	1	0	0	0	20	3	9	0	Nucleus, nucleoplasm {ECO:0000269|PubMed:17289661}. Cytoplasm {ECO:0000269|PubMed:17289661}. Note=Localized in cytoplasmic mRNP granules containing untranslated mRNAs. Component of ribonucleosomes. Predominantly nucleoplasmic, however isoform A2 is also found in the cytoplasm of cells in some tissues. Not found in the nucleolus.	0	0	0	0
EEF1D	1936	P29692	LVPVGyGIR	P29692-238	IV	3	0	0	2	2	0	2	2	0	0	0	0	3	4	4	0	Isoform 2: Nucleus {ECO:0000269|PubMed:21597468}.	0	0	0	0
TAGLN2	8407	P37802	GPAyGLSR	P37802-8	IV	3	0	0	3	2	0	2	5	0	0	0	0	3	5	7	0	0	0	0	0	0
TAGLN2	8407	P37802	GASQAGMTGyGMPR	P37802-192	IV	9	10	0	11	18	5	8	15	2	0	0	0	19	34	25	0	0	0	0	0	0
RBMX	27316	P38159	DRDySDHPSGGSYR	P38159-272	IV	1	1	0	0	1	0	0	0	0	0	0	0	2	1	0	0	Nucleus {ECO:0000269|PubMed:19282290, ECO:0000269|PubMed:21327109}. Note=Component of ribonucleosomes. Localizes in numerous small granules in the nucleus.	0	0	0	0
ACTB	60	P60709	IWHHTFyNELR	P60709-91	IV	1	1	0	1	3	3	4	5	2	0	0	0	2	7	11	0	Cytoplasm, cytoskeleton {ECO:0000269|PubMed:17289661}. Note=Localized in cytoplasmic mRNP granules containing untranslated mRNAs.	0	0	0	0
ACTB	60	P60709	TTGIVMDSGDGVTHTVPIyEGYALPHAILR	P60709-166	IV	2	0	1	7	3	8	11	3	2	0	0	0	3	18	16	0	Cytoplasm, cytoskeleton {ECO:0000269|PubMed:17289661}. Note=Localized in cytoplasmic mRNP granules containing untranslated mRNAs.	0	0	0	0
ACTB	60	P60709	TTGIVMDSGDGVTHTVPIYEGyALPHAILR	P60709-169	IV	3	7	14	10	15	18	11	21	23	0	0	0	24	43	55	0	Cytoplasm, cytoskeleton {ECO:0000269|PubMed:17289661}. Note=Localized in cytoplasmic mRNP granules containing untranslated mRNAs.	0	0	0	0
ACTB	60	P60709	ILTERGySFTTTAER	P60709-198	IV	3	1	1	4	3	2	5	3	1	0	0	0	5	9	9	0	Cytoplasm, cytoskeleton {ECO:0000269|PubMed:17289661}. Note=Localized in cytoplasmic mRNP granules containing untranslated mRNAs.	0	0	0	0
RPS3A	6189	P61247	VERADGyEPPVQESV	P61247-256	IV	2	2	0	1	4	2	4	7	1	0	0	0	4	7	12	0	Cytoplasm {ECO:0000255|HAMAP-Rule:MF_03122, ECO:0000269|PubMed:17289661}. Nucleus {ECO:0000255|HAMAP-Rule:MF_03122}. Note=Localized in cytoplasmic mRNP granules containing untranslated mRNAs.	0	0	0	0
HIST1H4A	8359	P62805	TVTAMDVVyALK	P62805-89	IV	1	7	3	1	5	0	0	8	0	0	0	0	11	6	8	0	.	0	0	0	0
EIF5A	1984	P63241	RNDFQLIGIQDGyLSLLQDSGEVR	P63241-98	IV	5	5	3	2	10	4	1	8	2	0	0	0	13	16	11	0	Cytoplasm. Nucleus. Endoplasmic reticulum membrane; Peripheral membrane protein; Cytoplasmic side. Nucleus, nuclear pore complex. Note=Hypusine modification promotes the nuclear export and cytoplasmic localization and there was a dynamic shift in the localization from predominantly cytoplasmic to primarily nuclear under apoptotic inducing conditions.	0	0	0	0
YBX1	4904	P67809	NYQQNyQNSESGEKNEGSESAPEGQAQQR	P67809-162	IV	2	0	0	2	2	8	3	0	3	0	0	0	2	12	6	0	Cytoplasm. Nucleus. Cytoplasmic granule {ECO:0000269|PubMed:25229427}. Secreted. Note=Localized in cytoplasmic mRNP granules containing untranslated mRNAs. Shuttles between nucleus and cytoplasm. Predominantly cytoplasmic in proliferating cells. Cytotoxic stress and DNA damage enhance translocation to the nucleus. Localized with DDX1, MBNL1 and TIAL1 in stress granules upon stress. Secreted by me…	0	0	0	0
YBX1	4904	P67809	RPQySNPPVQGEVMEGADNQGAGEQGRPVR	P67809-208	IV	3	0	1	1	3	6	4	0	9	0	0	0	4	10	13	0	Cytoplasm. Nucleus. Cytoplasmic granule {ECO:0000269|PubMed:25229427}. Secreted. Note=Localized in cytoplasmic mRNP granules containing untranslated mRNAs. Shuttles between nucleus and cytoplasm. Predominantly cytoplasmic in proliferating cells. Cytotoxic stress and DNA damage enhance translocation to the nucleus. Localized with DDX1, MBNL1 and TIAL1 in stress granules upon stress. Secreted by me…	0	0	0	0
TUBA1B	10376	P68363	VGINyQPPTVVPGGDLAK	P68363-357	IV	0	0	1	0	4	2	3	2	3	0	0	0	1	6	8	0	Cytoplasm, cytoskeleton.	0	0	0	0
RBM3	5935	P98179	YYDSRPGGYGYGyGR	P98179-129	IV	0	1	0	0	0	1	0	1	1	0	0	0	1	1	2	0	Nucleus {ECO:0000250}. Cytoplasm {ECO:0000250}. Cell projection, dendrite {ECO:0000250}. Note=Localizes in mRNA granules in dentrites. {ECO:0000250}.	0	0	0	0
CIRBP	1153	Q14011	SSGGSyRDSYDSYATHNE	Q14011-160	IV	2	1	0	0	1	0	0	0	0	0	0	0	3	1	0	0	Nucleus, nucleoplasm {ECO:0000269|PubMed:11574538}. Cytoplasm {ECO:0000269|PubMed:11574538}. Note=Translocates from the nucleus to the cytoplasm after exposure to UV radiation. Translocates from the nucleus to the cytoplasm into stress granules upon various cytoplasmic stresses, such as osmotic and heat shocks. Its recruitment into stress granules occurs in the absence of TIAR proteins (By simila…	0	0	0	0
CIRBP	1153	Q14011	SSGGSYRDSyDSYATHNE	Q14011-164	IV	1	0	0	0	0	2	0	2	2	0	0	0	1	2	4	0	Nucleus, nucleoplasm {ECO:0000269|PubMed:11574538}. Cytoplasm {ECO:0000269|PubMed:11574538}. Note=Translocates from the nucleus to the cytoplasm after exposure to UV radiation. Translocates from the nucleus to the cytoplasm into stress granules upon various cytoplasmic stresses, such as osmotic and heat shocks. Its recruitment into stress granules occurs in the absence of TIAR proteins (By simila…	0	0	0	0
CYP51A1	1595	Q16850	NEDLNAEDVySR	Q16850-131	IV	6	3	1	4	0	1	12	0	0	12	8	8	10	5	12	28	Endoplasmic reticulum membrane {ECO:0000305}. Microsome membrane {ECO:0000305}.	0	0	0	0
CYP51A1	1595	Q16850	GVAyDVPNPVFLEQK	Q16850-145	IV	0	0	1	2	0	0	1	0	0	5	5	9	1	2	1	19	Endoplasmic reticulum membrane {ECO:0000305}. Microsome membrane {ECO:0000305}.	0	0	0	0
UPF1	5976	Q92900	AYQHGGVTGLSQy	Q92900-1129	IV	1	0	0	1	1	0	0	4	0	0	0	0	1	2	4	0	Cytoplasm. Cytoplasm, P-body. Nucleus. Note=Hyperphosphorylated form is targeted to the P-body, while unphosphorylated protein is distributed throughout the cytoplasm.	0	0	0	0
PPP1R14B	26472	Q96C90	VyFQSPPGAAGEGPGGADDEGPVRR	Q96C90-29	IV	2	0	0	1	2	1	1	0	0	0	0	0	2	4	1	0	Cytoplasm {ECO:0000305}.	0	0	0	0
HNRNPAB	3182	Q99729	EVYQQQQyGSGGR	Q99729-240	IV	1	2	0	0	3	0	0	1	0	0	0	0	3	3	1	0	Nucleus {ECO:0000269|PubMed:17289661}. Cytoplasm {ECO:0000269|PubMed:17289661}. Note=Localized in cytoplasmic mRNP granules containing untranslated mRNAs.	0	0	0	0

## Sheet: M1
Replicate	Gene Name	Gene Description	Entrez ID	UNIPROT ID	Peptide sequence	Previous amino acid	Next amino acid	SEQUEST XCorr score	SEQUEST DCn score	X! Tandem -log(e) score	Peptide START	Labeling site	UNIPROT-site	Unique Spectrum Count
APR-1AB	UQCRQ	Cytochrome b-c1 complex subunit 8 (Complex III subunit 8) (Complex III subunit VIII) (Ubiquinol-cytochrome c reductase complex 9.5 kDa protein) (Ubiquinol-cytochrome c reductase complex ubiquinone-binding protein QP-C)	27089	O14949	HVISySLSPFEQR	R	A	4.6	0.69	3.27	13	17	O14949-17	11
APR-1AB	NDUFA2	NADH dehydrogenase [ubiquinone] 1 alpha subcomplex subunit 2 (Complex I-B8) (CI-B8) (NADH-ubiquinone oxidoreductase B8 subunit)	4695	O43678	yAFGQETNVPLNNFSADQVTR	R	A	4.54	0.707	6.06	69	69	O43678-69	9
APR-1AB	TBCA	Tubulin-specific chaperone A (TCP1-chaperonin cofactor A) (Tubulin-folding cofactor A) (CFA)	6902	O75347	MRAEDGENyDIKK	K	Q	3.04	0.408	0	40	48	O75347-48	1
APR-1AB	CS	Citrate synthase, mitochondrial (EC 2.3.3.1) (Citrate (Si)-synthase)	1431	O75390	AyAQGISR	R	T	2.89	0.404	1.46	184	185	O75390-185	3
APR-1AB	CS	Citrate synthase, mitochondrial (EC 2.3.3.1) (Citrate (Si)-synthase)	1431	O75390	VVPGyGHAVLR	R	K	1.82	0.118	1.8	341	345	O75390-345	1
APR-1AB	CS	Citrate synthase, mitochondrial (EC 2.3.3.1) (Citrate (Si)-synthase)	1431	O75390	LVAQLyKIVPNVLLEQGK	K	A	2.23	0.499	0	376	381	O75390-381	1
APR-1AB	PMPCB	Mitochondrial-processing peptidase subunit beta (EC 3.4.24.64) (Beta-MPP) (P-52)	9512	O75439	YIyNRSPAIAAVGPIK	K	Q	3.04	0.528	3.92	457	459	O75439-459	1
APR-1AB	ATP5H	ATP synthase subunit d, mitochondrial (ATPase subunit d)	10476	O75947	IVEyEKEMEK	R	M	2.72	0.402	4	112	115	O75947-115	1
APR-1AB	ATP5H	ATP synthase subunit d, mitochondrial (ATPase subunit d)	10476	O75947	LAALPENPPAIDWAyYK	R	A	3.2	0.476	2.48	42	56	O75947-56	1
APR-1AB	ATP5H	ATP synthase subunit d, mitochondrial (ATPase subunit d)	10476	O75947	LAALPENPPAIDWAYyK	R	A	2.92	0.568	4.44	42	57	O75947-57	1
APR-1AB	ATP5L	ATP synthase subunit g, mitochondrial (ATPase subunit g)	10632	O75964	LATFWyYAK	R	V	2.29	0.441	2.8	27	32	O75964-32	2
APR-1AB	ATP5L	ATP synthase subunit g, mitochondrial (ATPase subunit g)	10632	O75964	LATFWyyAKVELVPPTPAEIPR	R	A	2.19	0.356	1.6	27	33	O75964-33	1
APR-1AB	GLS	Glutaminase kidney isoform, mitochondrial (GLS) (EC 3.5.1.2) (K-glutaminase) (L-glutamine amidohydrolase)	2744	O94925-3	VSPESNEDISTTVVyR	K	M	3.29	0.42	6.03	575	589	O94925-3-589	6
APR-1AB	LETM1	LETM1 and EF-hand domain-containing protein 1, mitochondrial (Leucine zipper-EF-hand-containing transmembrane protein 1)	3954	O95202	LEEGGPVySPPAEVVVK	K	K	4	0.459	1.92	134	141	O95202-141	8
APR-1AB	LETM1	LETM1 and EF-hand domain-containing protein 1, mitochondrial (Leucine zipper-EF-hand-containing transmembrane protein 1)	3954	O95202	AMyLPDTLSPADQLK	R	S	3.62	0.527	3.37	420	422	O95202-422	2
APR-1AB	LETM1	LETM1 and EF-hand domain-containing protein 1, mitochondrial (Leucine zipper-EF-hand-containing transmembrane protein 1)	3954	O95202	TGEEKyVEESK	K	A	2.43	0.48	2.85	593	598	O95202-598	1
APR-1AB	ALDOA	Fructose-bisphosphate aldolase A (EC 4.1.2.13) (Lung cancer antigen NY-LU-1) (Muscle-type aldolase)	226	P04075	YTPSGQAGAAASESLFVSNHAy	K	-	3.79	0.73	10.9	343	364	P04075-364	9
APR-1AB	OAT	Ornithine aminotransferase, mitochondrial (EC 2.6.1.13) (Ornithine delta-aminotransferase) (Ornithine--oxo-acid aminotransferase) [Cleaved into: Ornithine aminotransferase, hepatic form; Ornithine aminotransferase, renal form]	4942	P04181	AFYNNVLGEYEEyITK	R	L	2.35	0.549	2.62	114	126	P04181-126	1
APR-1AB	OAT	Ornithine aminotransferase, mitochondrial (EC 2.6.1.13) (Ornithine delta-aminotransferase) (Ornithine--oxo-acid aminotransferase) [Cleaved into: Ornithine aminotransferase, hepatic form; Ornithine aminotransferase, renal form]	4942	P04181	TVQGPPTSDDIFEREyK	K	Y	2.69	0.44	0	33	48	P04181-48	1
APR-1AB	ATP5B	ATP synthase subunit beta, mitochondrial (EC 3.6.3.14)	506	P06576	AHGGySVFAGVGER	K	T	2.99	0.47	1.8	226	230	P06576-230	8
APR-1AB	ATP5B	ATP synthase subunit beta, mitochondrial (EC 3.6.3.14)	506	P06576	TREGNDLyHEMIESGVINLK	R	D	2.88	0.435	0.77	240	247	P06576-247	1
APR-1AB	ATP5B	ATP synthase subunit beta, mitochondrial (EC 3.6.3.14)	506	P06576	AIAELGIyPAVDPLDSTSR	R	I	3.59	0.653	4.54	388	395	P06576-395	8
APR-1AB	ATP5B	ATP synthase subunit beta, mitochondrial (EC 3.6.3.14)	506	P06576	IMDPNIVGSEHyDVAR	R	G	4.26	0.561	6.24	407	418	P06576-418	2
APR-1AB	PFN1	Profilin-1 (Epididymis tissue protein Li 184a) (Profilin I)	5216	P07737	SSFyVNGLTLGGQK	R	C	3.8	0.452	3.49	57	60	P07737-60	2
APR-1AB	HSP90AA1	Heat shock protein HSP 90-alpha (Heat shock 86 kDa) (HSP 86) (HSP86) (Lipopolysaccharide-associated protein 2) (LAP-2) (LPS-associated protein 2) (Renal carcinoma antigen NY-REN-38)	3320	P07900	DNSTMGyMAAK	R	K	2.39	0.495	1.85	621	627	P07900-627	2
APR-1AB	PDHA1	Pyruvate dehydrogenase E1 component subunit alpha, somatic form, mitochondrial (EC 1.2.4.1) (PDHE1-A type I)	5160	P08559	YHGHSMSDPGVSyR	R	T	4.23	0.567	8.96	289	301	P08559-301	14
APR-1AB	HNRNPA1	Heterogeneous nuclear ribonucleoprotein A1 (hnRNP A1) (Helix-destabilizing protein) (Single-strand RNA-binding protein) (hnRNP core protein A1) [Cleaved into: Heterogeneous nuclear ribonucleoprotein A1, N-terminally processed]	3178	P09651	SSGPyGGGGQYFAKPR	R	N	3.32	0.445	4.3	337	341	P09651-341	4
APR-1AB	HNRNPA1	Heterogeneous nuclear ribonucleoprotein A1 (hnRNP A1) (Helix-destabilizing protein) (Single-strand RNA-binding protein) (hnRNP core protein A1) [Cleaved into: Heterogeneous nuclear ribonucleoprotein A1, N-terminally processed]	3178	P09651	SSGPYGGGGQyFAKPR	R	N	2.87	0.424	3.55	337	347	P09651-347	1
APR-1AB	HNRNPA1	Heterogeneous nuclear ribonucleoprotein A1 (hnRNP A1) (Helix-destabilizing protein) (Single-strand RNA-binding protein) (hnRNP core protein A1) [Cleaved into: Heterogeneous nuclear ribonucleoprotein A1, N-terminally processed]	3178	P09651	NQGGyGGSSSSSSYGSGR	R	R	3.09	0.726	8.77	353	357	P09651-357	3
APR-1AB	HNRNPA1	Heterogeneous nuclear ribonucleoprotein A1 (hnRNP A1) (Helix-destabilizing protein) (Single-strand RNA-binding protein) (hnRNP core protein A1) [Cleaved into: Heterogeneous nuclear ribonucleoprotein A1, N-terminally processed]	3178	P09651	NQGGYGGSSSSSSyGSGR	R	R	3.89	0.665	5.42	353	366	P09651-366	5
APR-1AB	HSPA1A	Heat shock 70 kDa protein 1A (Heat shock 70 kDa protein 1) (HSP70-1) (HSP70.1)	3303	P0DMV8	ELEQVcNPIISGLyQGAGGPGPGGFGAQGPK	K	G	4.66	0.53	8.62	598	611	P0DMV8-611	1
APR-1AB	COX5B	Cytochrome c oxidase subunit 5B, mitochondrial (Cytochrome c oxidase polypeptide Vb)	1329	P10606	KGLDPyNVLAPK	K	G	3	0.413	0	57	62	P10606-62	9
APR-1AB	HSPD1	60 kDa heat shock protein, mitochondrial (60 kDa chaperonin) (Chaperonin 60) (CPN60) (Heat shock protein 60) (HSP-60) (Hsp60) (HuCHA60) (Mitochondrial matrix protein P1) (P60 lymphocyte protein)	3329	P10809	GYISPyFINTSK	R	G	2.61	0.597	2.4	222	227	P10809-227	3
APR-1AB	HSPD1	60 kDa heat shock protein, mitochondrial (60 kDa chaperonin) (Chaperonin 60) (CPN60) (Heat shock protein 60) (HSP-60) (Hsp60) (HuCHA60) (Mitochondrial matrix protein P1) (P60 lymphocyte protein)	3329	P10809	IQEIIEQLDVTTSEyEKEK	R	L	4.8	0.579	5.66	371	385	P10809-385	8
APR-1AB	HSPD1	60 kDa heat shock protein, mitochondrial (60 kDa chaperonin) (Chaperonin 60) (CPN60) (Heat shock protein 60) (HSP-60) (Hsp60) (HuCHA60) (Mitochondrial matrix protein P1) (P60 lymphocyte protein)	3329	P10809	IMQSSSEVGyDAMAGDFVNMVEK	K	G	4.11	0.576	5	494	503	P10809-503	10
APR-1AB	PDHB	Pyruvate dehydrogenase E1 component subunit beta, mitochondrial (PDHE1-B) (EC 1.2.4.1)	5162	P11177	VFLLGEEVAQyDGAYK	K	V	4.36	0.696	4.74	53	63	P11177-63	7
APR-1AB	PDHB	Pyruvate dehydrogenase E1 component subunit beta, mitochondrial (PDHE1-B) (EC 1.2.4.1)	5162	P11177	VFLLGEEVAQYDGAyK	K	V	3.52	0.607	2.96	53	67	P11177-67	2
APR-1AB	ACADM	Medium-chain specific acyl-CoA dehydrogenase, mitochondrial (MCAD) (EC 1.3.8.7)	34	P11310	MTEEPLMcAycVTEPGAGSDVAGIK	R	T	2.66	0.507	0	149	158	P11310-158	1
APR-1AB	PC	Pyruvate carboxylase, mitochondrial (EC 6.4.1.1) (Pyruvic carboxylase) (PCB)	5091	P11498	SVVEFLQGyIGVPHGGFPEPFR	R	S	2.91	0.415	0	943	951	P11498-951	1
APR-1AB	BCKDHA	2-oxoisovalerate dehydrogenase subunit alpha, mitochondrial (EC 1.2.4.4) (Branched-chain alpha-keto acid dehydrogenase E1 component alpha chain) (BCKDE1A) (BCKDH E1-alpha)	593	P12694	NNGyAISTPTSEQYR	R	G	3.03	0.469	4.92	266	269	P12694-269	3
APR-1AB	BCKDHA	2-oxoisovalerate dehydrogenase subunit alpha, mitochondrial (EC 1.2.4.4) (Branched-chain alpha-keto acid dehydrogenase E1 component alpha chain) (BCKDE1A) (BCKDH E1-alpha)	593	P12694	AVAENQPFLIEAMTyR	R	I	2.78	0.521	0	317	331	P12694-331	1
APR-1AB	BCKDHA	2-oxoisovalerate dehydrogenase subunit alpha, mitochondrial (EC 1.2.4.4) (Branched-chain alpha-keto acid dehydrogenase E1 component alpha chain) (BCKDE1A) (BCKDH E1-alpha)	593	P12694	SVDEVNyWDKQDHPISR	R	L	2.47	0.411	1.89	347	353	P12694-353	1
APR-1AB	COX4I1	Cytochrome c oxidase subunit 4 isoform 1, mitochondrial (Cytochrome c oxidase polypeptide IV) (Cytochrome c oxidase subunit IV isoform 1) (COX IV-1)	1327	P13073	SEDFSLPAyMDR	K	R	2.49	0.516	2.05	30	38	P13073-38	1
APR-1AB	ETFA	Electron transfer flavoprotein subunit alpha, mitochondrial (Alpha-ETF)	2108	P13804	LLyDLADQLHAAVGASR	K	A	3.57	0.551	0	233	235	P13804-235	2
APR-1AB	ETFA	Electron transfer flavoprotein subunit alpha, mitochondrial (Alpha-ETF)	2108	P13804	TIVAINKDPEAPIFQVADyGIVADLFK	K	V	3.01	0.654	0.959	295	313	P13804-313	1
APR-1AB	MTHFD2	Bifunctional methylenetetrahydrofolate dehydrogenase/cyclohydrolase, mitochondrial [Includes: NAD-dependent methylenetetrahydrofolate dehydrogenase (EC 1.5.1.15); Methenyltetrahydrofolate cyclohydrolase (EC 3.5.4.9)]	10797	P13995	RPHLSVILVGENPASHSyVLNK	K	T	5.18	0.585	1.8	67	84	P13995-84	4
APR-1AB	HNRNPL	Heterogeneous nuclear ribonucleoprotein L (hnRNP L)	3191	P14866	YGPQYGHPPPPPPPPEyGPHADSPVLMVYGLDQSK	R	M	1.96	0.0133	2.82	359	375	P14866-375	1
APR-1AB	HNRNPL	Heterogeneous nuclear ribonucleoprotein L (hnRNP L)	3191	P14866	MAAAGGGGGGGRYyGGGSEGGR	K	A	2.51	0.491	1.82	35	48	P14866-48	1
APR-1AB	HNRNPL	Heterogeneous nuclear ribonucleoprotein L (hnRNP L)	3191	P14866	TDNAGDQHGGGGGGGGGAGAAGGGGGGENyDDPHKTPASPVVHIR	K	G	4.67	0.524	5.03	63	92	P14866-92	2
APR-1AB	COX7C	Cytochrome c oxidase subunit 7C, mitochondrial (Cytochrome c oxidase polypeptide VIIc)	1350	P15954	SHyEEGPGK	R	N	2.33	0.51	0	17	19	P15954-19	3
APR-1AB	ATP5J	ATP synthase-coupling factor 6, mitochondrial (ATPase subunit F6)	522	P18859	RQTSGGPVDASSEyQQELER	K	E	3.86	0.489	2.92	54	67	P18859-67	11
APR-1AB	COX5A	Cytochrome c oxidase subunit 5A, mitochondrial (Cytochrome c oxidase polypeptide Va)	9377	P20674	GINTLVTyDMVPEPK	K	I	3.1	0.264	6.77	73	80	P20674-80	6
APR-1AB	MUT	Methylmalonyl-CoA mutase, mitochondrial (MCM) (EC 5.4.99.2) (Methylmalonyl-CoA isomerase)	4594	P22033	AGQQGLSVAFDLATHRGyDSDNPR	K	V	3.09	0.417	0	129	146	P22033-146	2
APR-1AB	MUT	Methylmalonyl-CoA mutase, mitochondrial (MCM) (EC 5.4.99.2) (Methylmalonyl-CoA isomerase)	4594	P22033	MVSGAyRQEFGESK	R	E	2.9	0.517	5.64	582	587	P22033-587	3
APR-1AB	HNRNPA2B1	Heterogeneous nuclear ribonucleoproteins A2/B1 (hnRNP A2/B1)	3181	P22626	yHTINGHNAEVR	K	K	2.97	0.421	0.796	174	174	P22626-174	1
APR-1AB	HNRNPA2B1	Heterogeneous nuclear ribonucleoproteins A2/B1 (hnRNP A2/B1)	3181	P22626	GGSDGyGSGR	R	G	1.33	0.252	1.14	229	234	P22626-234	1
APR-1AB	HNRNPA2B1	Heterogeneous nuclear ribonucleoproteins A2/B1 (hnRNP A2/B1)	3181	P22626	GFGDGyNGYGGGPGGGNFGGSPGYGGGR	R	G	2.87	0.657	3.02	239	244	P22626-244	1
APR-1AB	HNRNPA2B1	Heterogeneous nuclear ribonucleoproteins A2/B1 (hnRNP A2/B1)	3181	P22626	GFGDGYNGyGGGPGGGNFGGSPGYGGGR	R	G	2.3	0.601	2.82	239	247	P22626-247	1
APR-1AB	HNRNPA2B1	Heterogeneous nuclear ribonucleoproteins A2/B1 (hnRNP A2/B1)	3181	P22626	NmGGPyGGGNYGPGGSGGSGGYGGR	R	S	4.21	0.722	7.12	326	331	P22626-331	7
APR-1AB	HNRNPA2B1	Heterogeneous nuclear ribonucleoproteins A2/B1 (hnRNP A2/B1)	3181	P22626	NMGGPYGGGNyGPGGSGGSGGYGGR	R	S	3.7	0.606	8.62	326	336	P22626-336	6
APR-1AB	HNRNPA2B1	Heterogeneous nuclear ribonucleoproteins A2/B1 (hnRNP A2/B1)	3181	P22626	NMGGPYGGGNYGPGGSGGSGGyGGR	R	S	5.24	0.715	3.35	326	347	P22626-347	12
APR-1AB	UQCRC2	Cytochrome b-c1 complex subunit 2, mitochondrial (Complex III subunit 2) (Core protein II) (Ubiquinol-cytochrome-c reductase complex core protein 2)	7385	P22695	VTSEELHyFVQNHFTSAR	K	M	2.96	0.356	1.52	200	207	P22695-207	1
APR-1AB	UQCRC2	Cytochrome b-c1 complex subunit 2, mitochondrial (Complex III subunit 2) (Core protein II) (Ubiquinol-cytochrome-c reductase complex core protein 2)	7385	P22695	LPNGLVIASLENySPVSR	K	I	3.69	0.619	3.1	43	55	P22695-55	2
APR-1AB	ME2	NAD-dependent malic enzyme, mitochondrial (NAD-ME) (EC 1.1.1.38) (Malic enzyme 2)	4200	P23368	ILGLGDLGVyGMGIPVGK	R	L	2.74	0.59	5.68	166	175	P23368-175	1
APR-1AB	ME2	NAD-dependent malic enzyme, mitochondrial (NAD-ME) (EC 1.1.1.38) (Malic enzyme 2)	4200	P23368	MAFRyPEPEDK	K	A	1.87	0.0789	0.824	539	543	P23368-543	3
APR-1AB	ME2	NAD-dependent malic enzyme, mitochondrial (NAD-ME) (EC 1.1.1.38) (Malic enzyme 2)	4200	P23368	yIyIMGIQER	K	N	2.94	0.498	0	82	82	P23368-82	2
APR-1AB	ME2	NAD-dependent malic enzyme, mitochondrial (NAD-ME) (EC 1.1.1.38) (Malic enzyme 2)	4200	P23368	YIyIMGIQER	K	N	3.01	0.588	0.921	82	84	P23368-84	5
APR-1AB	GCSH	Glycine cleavage system H protein, mitochondrial (Lipoic acid-containing protein)	2653	P23434	ScyEDGWLIK	K	M	2.15	0.283	1.22	137	139	P23434-139	1
APR-1AB	GCSH	Glycine cleavage system H protein, mitochondrial (Lipoic acid-containing protein)	2653	P23434	HEWVTTENGIGTVGISNFAQEALGDVVycSLPEVGTK	K	L	2.91	0.473	1.06	57	84	P23434-84	1
APR-1AB	ACAT1	Acetyl-CoA acetyltransferase, mitochondrial (EC 2.3.1.9) (Acetoacetyl-CoA thiolase) (T2)	38	P24752	GSTPyGGVKLEDLIVK	R	D	2.97	0.252	4.85	166	170	P24752-170	2
APR-1AB	ACAT1	Acetyl-CoA acetyltransferase, mitochondrial (EC 2.3.1.9) (Acetoacetyl-CoA thiolase) (T2)	38	P24752	NEQDAYAINSyTR	R	S	3.58	0.614	4.05	209	219	P24752-219	1
APR-1AB	ACAT1	Acetyl-CoA acetyltransferase, mitochondrial (EC 2.3.1.9) (Acetoacetyl-CoA thiolase) (T2)	38	P24752	IVAFADAAVEPIDFPIAPVyAASMVLK	R	D	4.56	0.595	5.24	312	331	P24752-331	4
APR-1AB	ATP5A1	ATP synthase subunit alpha, mitochondrial	498	P25705	LELAQyREVAAFAQFGSDLDAATQQLLSR	K	G	4.58	0.586	3.11	435	440	P25705-440	2
APR-1AB	ATP5A1	ATP synthase subunit alpha, mitochondrial	498	P25705	LTELLKQGQySPMAIEEQVAVIYAGVR	R	G	3.89	0.565	1.89	467	476	P25705-476	10
APR-1AB	EEF1D	Elongation factor 1-delta (EF-1-delta) (Antigen NY-CO-4)	1936	P29692	LVPVGyGIR	K	K	2.42	0.437	1.03	233	238	P29692-238	3
APR-1AB	C21orf33	ES1 protein homolog, mitochondrial	8209	P30042	GVEVTVGHEQEEGGKWPyAGTAEAIK	R	A	3.44	0.486	0	189	206	P30042-206	2
APR-1AB	PRDX3	Thioredoxin-dependent peroxide reductase, mitochondrial (EC 1.11.1.15) (Antioxidant protein 1) (AOP-1) (HBC189) (Peroxiredoxin III) (Prx-III) (Peroxiredoxin-3) (Protein MER5 homolog)	10935	P30048	AFQyVETHGEVcPANWTPDSPTIKPSPAASK	K	E	4.52	0.565	3.14	218	221	P30048-221	2
APR-1AB	PRDX3	Thioredoxin-dependent peroxide reductase, mitochondrial (EC 1.11.1.15) (Antioxidant protein 1) (AOP-1) (HBC189) (Peroxiredoxin III) (Prx-III) (Peroxiredoxin-3) (Protein MER5 homolog)	10935	P30048	AFQYVETHGEVcPANWTPDSPTIKPSPAASKEyFQK	K	V	2.8	0.205	1.96	218	250	P30048-250	1
APR-1AB	ALDH1B1	Aldehyde dehydrogenase X, mitochondrial (EC 1.2.1.3) (Aldehyde dehydrogenase 5) (Aldehyde dehydrogenase family 1 member B1)	219	P30837	VLGyIQLGQK	R	E	2.97	0.554	1.92	370	373	P30837-373	1
APR-1AB	SDHA	Succinate dehydrogenase [ubiquinone] flavoprotein subunit, mitochondrial (EC 1.3.5.1) (Flavoprotein subunit of complex II) (Fp)	6389	P31040	TEDGKIyQR	R	A	2.75	0.52	2.44	163	169	P31040-169	1
APR-1AB	SDHA	Succinate dehydrogenase [ubiquinone] flavoprotein subunit, mitochondrial (EC 1.3.5.1) (Flavoprotein subunit of complex II) (Fp)	6389	P31040	TLNEADcATVPPAIRSy	K	-	3.5	0.599	7.2	648	664	P31040-664	1
APR-1AB	UQCRC1	Cytochrome b-c1 complex subunit 1, mitochondrial (Complex III subunit 1) (Core protein I) (Ubiquinol-cytochrome-c reductase complex core protein 1)	7384	P31930	EVESMGAHLNAySTR	K	E	3.66	0.591	6.4	112	123	P31930-123	2
APR-1AB	UQCRC1	Cytochrome b-c1 complex subunit 1, mitochondrial (Complex III subunit 1) (Core protein I) (Ubiquinol-cytochrome-c reductase complex core protein 1)	7384	P31930	HLGGIPWTyAEDAVPTLTPcR	K	F	3.37	0.594	5.09	249	257	P31930-257	7
APR-1AB	UQCRC1	Cytochrome b-c1 complex subunit 1, mitochondrial (Complex III subunit 1) (Core protein I) (Ubiquinol-cytochrome-c reductase complex core protein 1)	7384	P31930	SLLTyGR	R	R	2.27	0.436	0.745	416	420	P31930-420	1
APR-1AB	HNRNPH3	Heterogeneous nuclear ribonucleoprotein H3 (hnRNP H3) (Heterogeneous nuclear ribonucleoprotein 2H9) (hnRNP 2H9)	3189	P31942	DGMDNQGGyGSVGR	R	M	1.93	0.498	3.55	288	296	P31942-296	1
APR-1AB	HNRNPH3	Heterogeneous nuclear ribonucleoprotein H3 (hnRNP H3) (Heterogeneous nuclear ribonucleoprotein 2H9) (hnRNP 2H9)	3189	P31942	MGMGNNYSGGYGTPDGLGGYGRGGGGSGGyYGQGGmSGGGWR	R	G	2.79	0.439	0	302	331	P31942-331	1
APR-1AB	SHMT2	Serine hydroxymethyltransferase, mitochondrial (SHMT) (EC 2.1.2.1) (Glycine hydroxymethyltransferase) (Serine methylase)	6472	P34897	yYGGAEVVDEIELLcQR	R	R	3.82	0.628	4.33	105	105	P34897-105	4
APR-1AB	SHMT2	Serine hydroxymethyltransferase, mitochondrial (SHMT) (EC 2.1.2.1) (Glycine hydroxymethyltransferase) (Serine methylase)	6472	P34897	YyGGAEVVDEIELLcQR	R	R	2.85	0.479	2.19	105	106	P34897-106	1
APR-1AB	TAGLN2	Transgelin-2 (Epididymis tissue protein Li 7e) (SM22-alpha homolog)	8407	P37802	GASQAGMTGyGMPR	R	Q	3.29	0.526	5.3	183	192	P37802-192	9
APR-1AB	TAGLN2	Transgelin-2 (Epididymis tissue protein Li 7e) (SM22-alpha homolog)	8407	P37802	GPAyGLSR	R	E	2.51	0.378	2.07	5	8	P37802-8	3
APR-1AB	RBMX	RNA-binding motif protein, X chromosome (Glycoprotein p43) (Heterogeneous nuclear ribonucleoprotein G) (hnRNP G) [Cleaved into: RNA-binding motif protein, X chromosome, N-terminally processed]	27316	P38159	DSyGGPPR	R	R	2.05	0.217	2.07	188	190	P38159-190	1
APR-1AB	RBMX	RNA-binding motif protein, X chromosome (Glycoprotein p43) (Heterogeneous nuclear ribonucleoprotein G) (hnRNP G) [Cleaved into: RNA-binding motif protein, X chromosome, N-terminally processed]	27316	P38159	DSYSSRDyPSSR	K	D	3.06	0.465	0.721	218	225	P38159-225	1
APR-1AB	RBMX	RNA-binding motif protein, X chromosome (Glycoprotein p43) (Heterogeneous nuclear ribonucleoprotein G) (hnRNP G) [Cleaved into: RNA-binding motif protein, X chromosome, N-terminally processed]	27316	P38159	DRDySDHPSGGSYR	R	D	2.39	0.356	3.41	269	272	P38159-272	1
APR-1AB	RBMX	RNA-binding motif protein, X chromosome (Glycoprotein p43) (Heterogeneous nuclear ribonucleoprotein G) (hnRNP G) [Cleaved into: RNA-binding motif protein, X chromosome, N-terminally processed]	27316	P38159	DRDYSDHPSGGSyRDSYESYGNSR	R	S	2.76	0.564	0.824	269	281	P38159-281	1
APR-1AB	RBMX	RNA-binding motif protein, X chromosome (Glycoprotein p43) (Heterogeneous nuclear ribonucleoprotein G) (hnRNP G) [Cleaved into: RNA-binding motif protein, X chromosome, N-terminally processed]	27316	P38159	GPPPSyGGSSR	R	Y	1.22	0.128	4.05	299	304	P38159-304	1
APR-1AB	HSPA9	Stress-70 protein, mitochondrial (75 kDa glucose-regulated protein) (GRP-75) (Heat shock 70 kDa protein 9) (Mortalin) (MOT) (Peptide-binding protein 74) (PBP74)	3313	P38646	RQAVTNPNNTFyATKR	K	L	4.28	0.567	0.658	107	118	P38646-118	8
APR-1AB	HSPA9	Stress-70 protein, mitochondrial (75 kDa glucose-regulated protein) (GRP-75) (Heat shock 70 kDa protein 9) (Mortalin) (MOT) (Peptide-binding protein 74) (PBP74)	3313	P38646	ETAENyLGHTAK	K	N	2.11	0.386	1.07	176	181	P38646-181	1
APR-1AB	HSPA9	Stress-70 protein, mitochondrial (75 kDa glucose-regulated protein) (GRP-75) (Heat shock 70 kDa protein 9) (Mortalin) (MOT) (Peptide-binding protein 74) (PBP74)	3313	P38646	NAVITVPAyFNDSQR	K	Q	2.99	0.498	5.11	188	196	P38646-196	1
APR-1AB	HSPA9	Stress-70 protein, mitochondrial (75 kDa glucose-regulated protein) (GRP-75) (Heat shock 70 kDa protein 9) (Mortalin) (MOT) (Peptide-binding protein 74) (PBP74)	3313	P38646	cELSSSVQTDINLPyLTMDSSGPK	K	H	2.69	0.339	2.74	317	331	P38646-331	6
APR-1AB	HSPA9	Stress-70 protein, mitochondrial (75 kDa glucose-regulated protein) (GRP-75) (Heat shock 70 kDa protein 9) (Mortalin) (MOT) (Peptide-binding protein 74) (PBP74)	3313	P38646	NAEKyAEEDR	K	R	2.44	0.455	2.55	564	568	P38646-568	4
APR-1AB	HSPA9	Stress-70 protein, mitochondrial (75 kDa glucose-regulated protein) (GRP-75) (Heat shock 70 kDa protein 9) (Mortalin) (MOT) (Peptide-binding protein 74) (PBP74)	3313	P38646	LFEMAyKK	K	M	2.23	0.271	2.22	647	652	P38646-652	2
APR-1AB	HADHA	Trifunctional enzyme subunit alpha, mitochondrial (78 kDa gastrin-binding protein) (TP-alpha) [Includes: Long-chain enoyl-CoA hydratase (EC 4.2.1.17); Long chain 3-hydroxyacyl-CoA dehydrogenase (EC 1.1.1.211)]	3030	P40939	THINyGVKGDVAVVR	R	I	2.68	0.516	0	39	43	P40939-43	1
APR-1AB	HADHA	Trifunctional enzyme subunit alpha, mitochondrial (78 kDa gastrin-binding protein) (TP-alpha) [Includes: Long-chain enoyl-CoA hydratase (EC 4.2.1.17); Long chain 3-hydroxyacyl-CoA dehydrogenase (EC 1.1.1.211)]	3030	P40939	FVDLyGAQK	R	I	2.45	0.257	2	720	724	P40939-724	2
APR-1AB	LRPPRC	Leucine-rich PPR motif-containing protein, mitochondrial (130 kDa leucine-rich protein) (LRP 130) (GP130)	10128	P42704	LLMSEDyFTQAMEVK	K	A	3.45	0.456	0	1076	1082	P42704-1082	3
APR-1AB	LRPPRC	Leucine-rich PPR motif-containing protein, mitochondrial (130 kDa leucine-rich protein) (LRP 130) (GP130)	10128	P42704	RDyLKEAVTTLK	R	T	3.14	0.484	0	1117	1119	P42704-1119	2
APR-1AB	LRPPRC	Leucine-rich PPR motif-containing protein, mitochondrial (130 kDa leucine-rich protein) (LRP 130) (GP130)	10128	P42704	VIEPQyFGLAYLFR	K	K	3.78	0.593	2.54	1210	1215	P42704-1215	2
APR-1AB	LRPPRC	Leucine-rich PPR motif-containing protein, mitochondrial (130 kDa leucine-rich protein) (LRP 130) (GP130)	10128	P42704	SyVSEKDVTSAK	K	A	3.36	0.618	4.74	1327	1328	P42704-1328	3
APR-1AB	LRPPRC	Leucine-rich PPR motif-containing protein, mitochondrial (130 kDa leucine-rich protein) (LRP 130) (GP130)	10128	P42704	ALyEHLTAK	K	N	2.88	0.505	2.52	1339	1341	P42704-1341	3
APR-1AB	LRPPRC	Leucine-rich PPR motif-containing protein, mitochondrial (130 kDa leucine-rich protein) (LRP 130) (GP130)	10128	P42704	yAGEPVPFIEPPESFEFYAQQLR	K	K	3.14	0.39	2.24	1365	1365	P42704-1365	2
APR-1AB	LRPPRC	Leucine-rich PPR motif-containing protein, mitochondrial (130 kDa leucine-rich protein) (LRP 130) (GP130)	10128	P42704	LIASycNVGDIEGASK	R	I	3.11	0.579	4.51	203	207	P42704-207	1
APR-1AB	ATP5O	ATP synthase subunit O, mitochondrial (Oligomycin sensitivity conferral protein) (OSCP)	539	P48047	IGEKyVDMSVK	R	T	2.42	0.404	2.92	189	193	P48047-193	1
APR-1AB	ATP5O	ATP synthase subunit O, mitochondrial (Oligomycin sensitivity conferral protein) (OSCP)	539	P48047	LVRPPVQVyGIEGR	K	Y	3.65	0.638	3.4	27	35	P48047-35	14
APR-1AB	ATP5O	ATP synthase subunit O, mitochondrial (Oligomycin sensitivity conferral protein) (OSCP)	539	P48047	VAASVLNPyVKR	K	S	2.99	0.416	1.64	74	82	P48047-82	7
APR-1AB	TUFM	Elongation factor Tu, mitochondrial (EF-Tu) (P43)	7284	P49411	LLDAVDTyIPVPAR	K	D	3.61	0.592	4.36	239	246	P49411-246	2
APR-1AB	IDH3A	Isocitrate dehydrogenase [NAD] subunit alpha, mitochondrial (EC 1.1.1.41) (Isocitric dehydrogenase subunit alpha) (NAD(+)-specific ICDH subunit alpha)	3419	P50213	IAEFAFEyAR	R	N	2.83	0.43	1.44	179	186	P50213-186	3
APR-1AB	ACTB	Actin, cytoplasmic 1 (Beta-actin) [Cleaved into: Actin, cytoplasmic 1, N-terminally processed]	60	P60709	TTGIVmDSGDGVTHTVPIyEGYALPHAILR	R	L	3.57	0.539	2.49	148	166	P60709-166	2
APR-1AB	ACTB	Actin, cytoplasmic 1 (Beta-actin) [Cleaved into: Actin, cytoplasmic 1, N-terminally processed]	60	P60709	TTGIVmDSGDGVTHTVPIYEGyALPHAILR	R	L	4.2	0.546	6.17	148	169	P60709-169	3
APR-1AB	ACTB	Actin, cytoplasmic 1 (Beta-actin) [Cleaved into: Actin, cytoplasmic 1, N-terminally processed]	60	P60709	ILTERGySFTTTAER	K	E	2.82	0.43	2.23	192	198	P60709-198	3
APR-1AB	ACTB	Actin, cytoplasmic 1 (Beta-actin) [Cleaved into: Actin, cytoplasmic 1, N-terminally processed]	60	P60709	IWHHTFyNELR	K	V	2.87	0.431	2.12	85	91	P60709-91	1
APR-1AB	RPS3A	40S ribosomal protein S3a (v-fos transformation effector protein) (Fte-1)	6189	P61247	VERADGyEPPVQESV	K	-	2.87	0.484	1.55	250	256	P61247-256	2
APR-1AB	HSPE1	10 kDa heat shock protein, mitochondrial (Hsp10) (10 kDa chaperonin) (Chaperonin 10) (CPN10) (Early-pregnancy factor) (EPF)	3336	P61604	DGDILGKyVD	R	-	1.52	0.036	1.72	93	100	P61604-100	2
APR-1AB	HSPE1	10 kDa heat shock protein, mitochondrial (Hsp10) (10 kDa chaperonin) (Chaperonin 10) (CPN10) (Early-pregnancy factor) (EPF)	3336	P61604	VLLPEyGGTK	K	V	2.54	0.521	0.921	71	76	P61604-76	5
APR-1AB	HNRNPK	Heterogeneous nuclear ribonucleoprotein K (hnRNP K) (Transformation up-regulated nuclear protein) (TUNP)	3190	P61978	GSyGDLGGPIITTQVTIPK	R	D	2.56	0.541	7.59	378	380	P61978-380	1
APR-1AB	HNRNPK	Heterogeneous nuclear ribonucleoprotein K (hnRNP K) (Transformation up-regulated nuclear protein) (TUNP)	3190	P61978	IITITGTQDQIQNAQyLLQNSVK	R	Q	3.97	0.527	0	434	449	P61978-449	2
APR-1AB	HNRNPK	Heterogeneous nuclear ribonucleoprotein K (hnRNP K) (Transformation up-regulated nuclear protein) (TUNP)	3190	P61978	TDyNASVSVPDSSGPER	R	I	3.32	0.554	7.43	70	72	P61978-72	4
APR-1AB	HIST1H4A	Histone H4	8359	P62805	DAVTyTEHAK	R	R	2.18	0.427	2.6	69	73	P62805-73	2
APR-1AB	HIST1H4A	Histone H4	8359	P62805	TVTAMDVVyALKR	K	Q	2.94	0.361	3.66	81	89	P62805-89	1
APR-1AB	EIF5A	Eukaryotic translation initiation factor 5A-1 (eIF-5A-1) (eIF-5A1) (Eukaryotic initiation factor 5A isoform 1) (eIF-5A) (Rev-binding factor) (eIF-4D)	1984	P63241	RNDFQLIGIQDGyLSLLQDSGEVR	K	E	3.51	0.409	2.36	86	98	P63241-98	5
APR-1AB	YBX1	Nuclease-sensitive element-binding protein 1 (CCAAT-binding transcription factor I subunit A) (CBF-A) (DNA-binding protein B) (DBPB) (Enhancer factor I subunit A) (EFI-A) (Y-box transcription factor) (Y-box-binding protein 1) (YB-1)	4904	P67809	NYQQNyQNSESGEKNEGSESAPEGQAQQR	R	R	4.21	0.593	7.57	157	162	P67809-162	2
APR-1AB	YBX1	Nuclease-sensitive element-binding protein 1 (CCAAT-binding transcription factor I subunit A) (CBF-A) (DNA-binding protein B) (DBPB) (Enhancer factor I subunit A) (EFI-A) (Y-box transcription factor) (Y-box-binding protein 1) (YB-1)	4904	P67809	RPQySNPPVQGEVMEGADNQGAGEQGRPVR	R	Q	3.93	0.538	0	205	208	P67809-208	3
APR-1AB	TFAM	Transcription factor A, mitochondrial (mtTFA) (Mitochondrial transcription factor 1) (MtTF1) (Transcription factor 6) (TCF-6) (Transcription factor 6-like 2)	7019	Q00059	AEWQVyKEEISR	R	F	2.83	0.458	0	105	110	Q00059-110	1
APR-1AB	TFAM	Transcription factor A, mitochondrial (mtTFA) (Mitochondrial transcription factor 1) (MtTF1) (Transcription factor 6) (TCF-6) (Transcription factor 6-like 2)	7019	Q00059	SAyNVYVAER	R	F	3.24	0.531	1.14	160	162	Q00059-162	5
APR-1AB	SSBP1	Single-stranded DNA-binding protein, mitochondrial (Mt-SSB) (MtSSB) (PWP1-interacting protein 17)	6742	Q04837	DVAYQyVKKGSR	R	I	2.86	0.49	4.6	96	101	Q04837-101	3
APR-1AB	SSBP1	Single-stranded DNA-binding protein, mitochondrial (Mt-SSB) (MtSSB) (PWP1-interacting protein 17)	6742	Q04837	IDYGEyMDKNNVR	K	R	2.93	0.36	4.18	114	119	Q04837-119	8
APR-1AB	SSBP1	Single-stranded DNA-binding protein, mitochondrial (Mt-SSB) (MtSSB) (PWP1-interacting protein 17)	6742	Q04837	SGDSEVyQLGDVSQK	R	T	4.09	0.507	2.62	67	73	Q04837-73	15
APR-1AB	SSBP1	Single-stranded DNA-binding protein, mitochondrial (Mt-SSB) (MtSSB) (PWP1-interacting protein 17)	6742	Q04837	DVAyQYVK	R	K	2.59	0.453	0.921	96	99	Q04837-99	2
APR-1AB	GRSF1	G-rich sequence factor 1 (GRSF-1)	2926	Q12849	HRMyMGQR	K	Y	2.7	0.471	0	213	216	Q12849-216	1
APR-1AB	GRSF1	G-rich sequence factor 1 (GRSF-1)	2926	Q12849	yVEVYEINNEDVDALMK	R	S	3.48	0.56	4.89	221	221	Q12849-221	1
APR-1AB	GRSF1	G-rich sequence factor 1 (GRSF-1)	2926	Q12849	yITEPEMVFEEHEVNEDIQPMTAFESEK	K	E	3.07	0.38	4.92	349	349	Q12849-349	1
APR-1AB	GRSF1	G-rich sequence factor 1 (GRSF-1)	2926	Q12849	SHVHHRyIELFLNScPK	R	G	3.13	0.358	1.51	462	468	Q12849-468	1
APR-1AB	TRAP1	Heat shock protein 75 kDa, mitochondrial (HSP 75) (TNFR-associated protein 1) (Tumor necrosis factor type 1 receptor-associated protein) (TRAP-1)	10131	Q12931	SLySEKEVFIR	R	E	3.41	0.43	0	104	106	Q12931-106	2
APR-1AB	ECH1	Delta(3,5)-Delta(2,4)-dienoyl-CoA isomerase, mitochondrial (EC 5.3.3.-)	1891	Q13011	DIITRyQETFNVIER	R	C	3.99	0.578	0	144	149	Q13011-149	8
APR-1AB	ECH1	Delta(3,5)-Delta(2,4)-dienoyl-CoA isomerase, mitochondrial (EC 5.3.3.-)	1891	Q13011	DHSVAESLNyVASWNMSMLQTQDLVK	R	S	3.79	0.547	3.74	284	293	Q13011-293	3
APR-1AB	CIRBP	Cold-inducible RNA-binding protein (A18 hnRNP) (Glycine-rich RNA-binding protein CIRP)	1153	Q14011	SGGYGGSRDYySSR	R	S	1.81	0.322	1.82	132	142	Q14011-142	1
APR-1AB	CIRBP	Cold-inducible RNA-binding protein (A18 hnRNP) (Glycine-rich RNA-binding protein CIRP)	1153	Q14011	SSGGSyRDSYDSYATHNE	R	-	3.23	0.763	5.03	155	160	Q14011-160	2
APR-1AB	CIRBP	Cold-inducible RNA-binding protein (A18 hnRNP) (Glycine-rich RNA-binding protein CIRP)	1153	Q14011	SSGGSYRDSyDSYATHNE	R	-	2.88	0.667	4.41	155	164	Q14011-164	1
APR-1AB	CIRBP	Cold-inducible RNA-binding protein (A18 hnRNP) (Glycine-rich RNA-binding protein CIRP)	1153	Q14011	DSYDSyATHNE	R	-	2.04	0.683	0.77	162	167	Q14011-167	1
APR-1AB	CTTN	Src substrate cortactin (Amplaxin) (Oncogene EMS1)	2017	Q14247	AELSyRGPVSGTEPEPVYSMEAADYR	K	E	3.83	0.618	5.3	429	433	Q14247-433	3
APR-1AB	CTTN	Src substrate cortactin (Amplaxin) (Oncogene EMS1)	2017	Q14247	GPVSGTEPEPVySMEAADYR	R	E	1.76	0.0432	2.03	435	446	Q14247-446	1
APR-1AB	HADH	Hydroxyacyl-coenzyme A dehydrogenase, mitochondrial (HCDH) (EC 1.1.1.35) (Medium and short-chain L-3-hydroxyacyl-coenzyme A dehydrogenase) (Short-chain 3-hydroxyacyl-CoA dehydrogenase)	3033	Q16836	LLVPyLMEAIR	R	L	3	0.512	1.24	222	226	Q16836-226	2
APR-1AB	HADH	Hydroxyacyl-coenzyme A dehydrogenase, mitochondrial (HCDH) (EC 1.1.1.35) (Medium and short-chain L-3-hydroxyacyl-coenzyme A dehydrogenase) (Short-chain 3-hydroxyacyl-CoA dehydrogenase)	3033	Q16836	LGAGyPmGPFELLDYVGLDTTK	K	F	2.94	0.549	1.12	250	254	Q16836-254	3
APR-1AB	CYP51A1	Lanosterol 14-alpha demethylase (LDM) (EC 1.14.13.70) (CYPLI) (Cytochrome P450 51A1) (Cytochrome P450-14DM) (Cytochrome P45014DM) (Cytochrome P450LI) (Sterol 14-alpha demethylase)	1595	Q16850	NEDLNAEDVySR	K	L	3.5	0.558	3.32	122	131	Q16850-131	6
APR-1AB	IMMT	MICOS complex subunit MIC60 (Cell proliferation-inducing gene 4/52 protein) (Mitochondrial inner membrane protein) (Mitofilin) (p87/89)	10989	Q16891	ySTSGSSGLTTGK	R	I	2.82	0.535	4.18	33	33	Q16891-33	9
APR-1AB	SND1	Staphylococcal nuclease domain-containing protein 1 (100 kDa coactivator) (EBNA2 coactivator p100) (Tudor domain-containing protein 11) (p100 co-activator)	27044	Q7KZF4	ADDADEFGySR	R	-	2.6	0.507	2.4	900	908	Q7KZF4-908	1
APR-1AB	GLRX5	Glutaredoxin-related protein 5, mitochondrial (Monothiol glutaredoxin-5)	51218	Q86SX6	LHGVRDyAAYNVLDDPELR	R	Q	3.67	0.595	4.1	79	85	Q86SX6-85	6
APR-1AB	GLRX5	Glutaredoxin-related protein 5, mitochondrial (Monothiol glutaredoxin-5)	51218	Q86SX6	DYAAyNVLDDPELR	R	Q	4.02	0.517	5.74	84	88	Q86SX6-88	1
APR-1AB	NDUFAF2	Mimitin, mitochondrial (B17.2-like) (B17.2L) (Myc-induced mitochondrial protein) (MMTN) (NADH dehydrogenase [ubiquinone] 1 alpha subcomplex assembly factor 2) (NDUFA12-like protein)	91942	Q8N183	SQDFyEKEK	K	L	2.05	0.352	1.17	102	106	Q8N183-106	1
APR-1AB	NDUFAF2	Mimitin, mitochondrial (B17.2-like) (B17.2L) (Myc-induced mitochondrial protein) (MMTN) (NADH dehydrogenase [ubiquinone] 1 alpha subcomplex assembly factor 2) (NDUFA12-like protein)	91942	Q8N183	GHASAPyFGKEEPSVAPSSTGK	K	T	3.19	0.45	1.03	131	137	Q8N183-137	3
APR-1AB	NDUFAF2	Mimitin, mitochondrial (B17.2-like) (B17.2L) (Myc-induced mitochondrial protein) (MMTN) (NADH dehydrogenase [ubiquinone] 1 alpha subcomplex assembly factor 2) (NDUFA12-like protein)	91942	Q8N183	EVDyEAGDIPTEWEAWIR	K	R	3.47	0.626	0	59	62	Q8N183-62	4
APR-1AB	GADD45GIP1	Growth arrest and DNA damage-inducible proteins-interacting protein 1 (39S ribosomal protein L59, mitochondrial) (MRP-L59) (CKII beta-associating protein) (CR6-interacting factor 1) (CRIF1) (Papillomavirus L2-interacting nuclear protein 1) (PLINP) (PLINP-1) (p53-responsive gene 6 protein)	90480	Q8TAE8	LQAEAQELLGyQVDPR	R	S	4.45	0.422	3.12	156	166	Q8TAE8-166	4
APR-1AB	TAF15	TATA-binding protein-associated factor 2N (68 kDa TATA-binding protein-associated factor) (TAF(II)68) (TAFII68) (RNA-binding protein 56)	8148	Q92804	QSSySQQPYNNQGQQQNMESSGSQGGR	K	A	3.53	0.543	3.07	75	78	Q92804-78	1
APR-1AB	UPF1	Regulator of nonsense transcripts 1 (EC 3.6.4.-) (ATP-dependent helicase RENT1) (Nonsense mRNA reducing factor 1) (NORF1) (Up-frameshift suppressor 1 homolog) (hUpf1)	5976	Q92900	SQIDVALSQDSTyQGER	K	A	2.83	0.523	3.26	1100	1112	Q92900-1112	1
APR-1AB	UPF1	Regulator of nonsense transcripts 1 (EC 3.6.4.-) (ATP-dependent helicase RENT1) (Nonsense mRNA reducing factor 1) (NORF1) (Up-frameshift suppressor 1 homolog) (hUpf1)	5976	Q92900	AYQHGGVTGLSQy	R	-	2.39	0.262	4.17	1117	1129	Q92900-1129	1
APR-1AB	FUBP1	Far upstream element-binding protein 1 (FBP) (FUSE-binding protein 1) (DNA helicase V) (hDH V)	8880	Q96AE4	IGGDAGTSLNSNDyGYGGQK	K	R	3.86	0.583	6.7	45	58	Q96AE4-58	2
APR-1AB	FUBP1	Far upstream element-binding protein 1 (FBP) (FUSE-binding protein 1) (DNA helicase V) (hDH V)	8880	Q96AE4	IGGDAGTSLNSNDYGyGGQK	K	R	2.39	0.451	3.04	45	60	Q96AE4-60	1
APR-1AB	FUBP1	Far upstream element-binding protein 1 (FBP) (FUSE-binding protein 1) (DNA helicase V) (hDH V)	8880	Q96AE4	QQAAyYAQTSPQGMPQHPPAPQGQ	R	-	3.92	0.546	4	621	625	Q96AE4-625	1
APR-1AB	PPP1R14B	Protein phosphatase 1 regulatory subunit 14B (Phospholipase C-beta-3 neighbouring gene protein)	26472	Q96C90	VyFQSPPGAAGEGPGGADDEGPVRR	R	Q	3.11	0.56	1.77	28	29	Q96C90-29	2
APR-1AB	DHTKD1	Probable 2-oxoglutarate dehydrogenase E1 component DHKTD1, mitochondrial (EC 1.2.4.2) (Dehydrogenase E1 and transketolase domain-containing protein 1)	55526	Q96HY7	MSAySGITDVIIGMPHR	K	G	3.69	0.415	2.2	208	211	Q96HY7-211	3
APR-1AB	DHTKD1	Probable 2-oxoglutarate dehydrogenase E1 component DHKTD1, mitochondrial (EC 1.2.4.2) (Dehydrogenase E1 and transketolase domain-containing protein 1)	55526	Q96HY7	IGGSVHLIVNNQLGyTTPAER	R	G	2.44	0.291	1.09	356	370	Q96HY7-370	1
APR-1AB	USMG5	Up-regulated during skeletal muscle growth protein 5 (Diabetes-associated protein in insulin-sensitive tissues) (HCV F-transactivated protein 2)	84833	Q96IX5	AGPESDAQyQFTGIK	M	K	0	0	8.4	2	10	Q96IX5-10	5
APR-1AB	USMG5	Up-regulated during skeletal muscle growth protein 5 (Diabetes-associated protein in insulin-sensitive tissues) (HCV F-transactivated protein 2)	84833	Q96IX5	YFNSyTLTGR	K	M	2.79	0.542	5.36	18	22	Q96IX5-22	4
APR-1AB	TBCB	Tubulin-folding cofactor B (Cytoskeleton-associated protein 1) (Cytoskeleton-associated protein CKAPI) (Tubulin-specific chaperone B)	1155	Q99426	YTISQEAyDQRQDTVR	K	S	2.67	0.283	0.678	107	114	Q99426-114	1
APR-1AB	TBCB	Tubulin-folding cofactor B (Cytoskeleton-associated protein 1) (Cytoskeleton-associated protein CKAPI) (Tubulin-specific chaperone B)	1155	Q99426	LGEyEDVSR	R	V	2.34	0.377	1.02	95	98	Q99426-98	1
APR-1AB	HNRNPAB	Heterogeneous nuclear ribonucleoprotein A/B (hnRNP A/B) (APOBEC1-binding protein 1) (ABBP-1)	3182	Q99729	EVyQQQQYGSGGR	K	G	2.33	0.401	2.01	233	235	Q99729-235	1
APR-1AB	HNRNPAB	Heterogeneous nuclear ribonucleoprotein A/B (hnRNP A/B) (APOBEC1-binding protein 1) (ABBP-1)	3182	Q99729	EVYQQQQyGSGGR	K	G	3.2	0.439	2.34	233	240	Q99729-240	1
APR-1AB	NIPSNAP1	Protein NipSnap homolog 1 (NipSnap1)	8508	Q9BPW8	GWDENVyYTVPLVR	R	H	3.03	0.386	0.824	255	261	Q9BPW8-261	1
APR-1AB	NIPSNAP1	Protein NipSnap homolog 1 (NipSnap1)	8508	Q9BPW8	GWDENVYyTVPLVR	R	H	3.25	0.453	1.77	255	262	Q9BPW8-262	4
APR-1AB	NDUFAF3	NADH dehydrogenase [ubiquinone] 1 alpha subcomplex assembly factor 3	25915	Q9BU61	LSPADDELyQR	R	T	2.25	0.328	1.54	34	42	Q9BU61-42	2
APR-1AB	NDUFAF3	NADH dehydrogenase [ubiquinone] 1 alpha subcomplex assembly factor 3	25915	Q9BU61	EAAQAMyIDSYNSR	R	G	3.07	0.708	4.35	53	59	Q9BU61-59	6
APR-1AB	NUCKS1	Nuclear ubiquitous casein and cyclin-dependent kinase substrate 1 (P1)	64710	Q9H1E3	VVDySQFQESDDADEDYGR	K	D	4.51	0.701	8.37	10	13	Q9H1E3-13	7
APR-1AB	NUCKS1	Nuclear ubiquitous casein and cyclin-dependent kinase substrate 1 (P1)	64710	Q9H1E3	VVDYSQFQESDDADEDyGRDSGPPTK	K	K	4.24	0.56	1.52	10	26	Q9H1E3-26	4
APR-1AB	GRPEL1	GrpE protein homolog 1, mitochondrial (HMGE) (Mt-GrpE#1)	80273	Q9HAV7	FDPyEHEALFHTPVEGK	K	E	3.83	0.602	0	170	173	Q9HAV7-173	7
APR-1AB	MCCC2	Methylcrotonoyl-CoA carboxylase beta chain, mitochondrial (MCCase subunit beta) (EC 6.4.1.4) (3-methylcrotonyl-CoA carboxylase 2) (3-methylcrotonyl-CoA carboxylase non-biotin-containing subunit) (3-methylcrotonyl-CoA:carbon dioxide ligase subunit beta)	64087	Q9HCC0	IFGyPVGIVGNNGVLFSESAK	R	K	3.29	0.633	3.25	362	365	Q9HCC0-365	4
APR-1AB	MCCC2	Methylcrotonoyl-CoA carboxylase beta chain, mitochondrial (MCCase subunit beta) (EC 6.4.1.4) (3-methylcrotonyl-CoA carboxylase 2) (3-methylcrotonyl-CoA carboxylase non-biotin-containing subunit) (3-methylcrotonyl-CoA:carbon dioxide ligase subunit beta)	64087	Q9HCC0	NIPLLFLQNITGFMVGREyEAEGIAK	R	D	3.17	0.51	0	395	413	Q9HCC0-413	1
APR-1AB	ABHD10	Mycophenolic acid acyl-glucuronide esterase, mitochondrial (EC 3.1.1.93) (Alpha/beta hydrolase domain-containing protein 10) (Abhydrolase domain-containing protein 10)	55347	Q9NUJ1	YSEEGVyNVQYSFIK	K	E	3.49	0.627	3.82	209	215	Q9NUJ1-215	2
APR-1AB	ABHD10	Mycophenolic acid acyl-glucuronide esterase, mitochondrial (EC 3.1.1.93) (Alpha/beta hydrolase domain-containing protein 10) (Abhydrolase domain-containing protein 10)	55347	Q9NUJ1	ADIQLLVyTIDDLIDK	K	L	2.7	0.498	0	285	292	Q9NUJ1-292	1
APR-1AB	ATPIF1	ATPase inhibitor, mitochondrial (Inhibitor of F(1)F(o)-ATPase) (IF(1)) (IF1)	93974	Q9UII2	EQAEEERyFR	R	A	1.78	0.282	0.959	51	58	Q9UII2-58	2
APR-1AB	STOML2	Stomatin-like protein 2, mitochondrial (SLP-2) (EPB72-like protein 2) (Paraprotein target 7) (Paratarg-7)	30968	Q9UJZ1	IMDPyKASYGVEDPEYAVTQLAQTTMR	R	S	3.63	0.567	2.06	109	113	Q9UJZ1-113	4
APR-1AB	STOML2	Stomatin-like protein 2, mitochondrial (SLP-2) (EPB72-like protein 2) (Paraprotein target 7) (Paratarg-7)	30968	Q9UJZ1	ASYGVEDPEyAVTQLAQTTMR	K	S	3.63	0.52	10	115	124	Q9UJZ1-124	2
APR-1AB	BCS1L	Mitochondrial chaperone BCS1 (h-BCS1) (BCS1-like protein)	617	Q9Y276	TQHLSVETSyLQHESGR	R	I	3.69	0.529	0	74	83	Q9Y276-83	1
APR-1AB	NDUFAF1	Complex I intermediate-associated protein 30, mitochondrial (NADH dehydrogenase [ubiquinone] 1 alpha subcomplex assembly factor 1)	51103	Q9Y375	KMSyDWSQFNTLYLR	R	V	3.02	0.355	1.08	197	200	Q9Y375-200	1
APR-1AB	NDUFAF1	Complex I intermediate-associated protein 30, mitochondrial (NADH dehydrogenase [ubiquinone] 1 alpha subcomplex assembly factor 1)	51103	Q9Y375	AIRDEAIyHFR	K	L	2.97	0.498	0	85	92	Q9Y375-92	2

## Sheet: M2
Replicate	Gene Name	Gene Description	Entrez ID	UNIPROT ID	Peptide sequence	Previous amino acid	Next amino acid	SEQUEST XCorr score	SEQUEST DCn score	X! Tandem -log(e) score	Peptide START	Labeling site	UNIPROT-site	Unique Spectrum Count
Jun-1AB	UQCRQ	Cytochrome b-c1 complex subunit 8 (Complex III subunit 8) (Complex III subunit VIII) (Ubiquinol-cytochrome c reductase complex 9.5 kDa protein) (Ubiquinol-cytochrome c reductase complex ubiquinone-binding protein QP-C)	27089	O14949	HVISySLSPFEQR	R	A	4.57	0.608	4.72	13	17	O14949-17	12
Jun-1AB	NDUFA2	NADH dehydrogenase [ubiquinone] 1 alpha subcomplex subunit 2 (Complex I-B8) (CI-B8) (NADH-ubiquinone oxidoreductase B8 subunit)	4695	O43678	yAFGQETNVPLNNFSADQVTR	R	A	4.69	0.618	3.57	69	69	O43678-69	6
Jun-1AB	CS	Citrate synthase, mitochondrial (EC 2.3.3.1) (Citrate (Si)-synthase)	1431	O75390	AyAQGISR	R	T	2.85	0.229	2.74	184	185	O75390-185	2
Jun-1AB	ATP5H	ATP synthase subunit d, mitochondrial (ATPase subunit d)	10476	O75947	LAALPENPPAIDWAyYK	R	A	3.98	0.548	0	42	56	O75947-56	2
Jun-1AB	ATP5L	ATP synthase subunit g, mitochondrial (ATPase subunit g)	10632	O75964	LATFWyYAK	R	V	2.71	0.385	1.43	27	32	O75964-32	2
Jun-1AB	GLS	Glutaminase kidney isoform, mitochondrial (GLS) (EC 3.5.1.2) (K-glutaminase) (L-glutamine amidohydrolase)	2744	O94925-3	VSPESNEDISTTVVyR	K	M	3.56	0.506	5.31	575	589	O94925-3-589	5
Jun-1AB	ALDOA	Fructose-bisphosphate aldolase A (EC 4.1.2.13) (Lung cancer antigen NY-LU-1) (Muscle-type aldolase)	226	P04075	YTPSGQAGAAASESLFVSNHAy	K	-	4.95	0.71	9.33	343	364	P04075-364	3
Jun-1AB	ATP5B	ATP synthase subunit beta, mitochondrial (EC 3.6.3.14)	506	P06576	VVDLLAPyAK	K	G	1.3	-0.0293	1.07	189	196	P06576-196	1
Jun-1AB	ATP5B	ATP synthase subunit beta, mitochondrial (EC 3.6.3.14)	506	P06576	AHGGySVFAGVGER	K	T	4.23	0.546	10.6	226	230	P06576-230	10
Jun-1AB	ATP5B	ATP synthase subunit beta, mitochondrial (EC 3.6.3.14)	506	P06576	VALVyGQMNEPPGAR	K	A	3.03	0.524	2.15	265	269	P06576-269	4
Jun-1AB	ATP5B	ATP synthase subunit beta, mitochondrial (EC 3.6.3.14)	506	P06576	AIAELGIyPAVDPLDSTSR	R	I	4.13	0.621	4.03	388	395	P06576-395	9
Jun-1AB	PDHA1	Pyruvate dehydrogenase E1 component subunit alpha, somatic form, mitochondrial (EC 1.2.4.1) (PDHE1-A type I)	5160	P08559	GPILMELQTyR	K	Y	2.65	0.316	0.721	278	287	P08559-287	2
Jun-1AB	PDHA1	Pyruvate dehydrogenase E1 component subunit alpha, somatic form, mitochondrial (EC 1.2.4.1) (PDHE1-A type I)	5160	P08559	YHGHSMSDPGVSyR	R	T	3.64	0.495	4.43	289	301	P08559-301	12
Jun-1AB	HNRNPA1	Heterogeneous nuclear ribonucleoprotein A1 (hnRNP A1) (Helix-destabilizing protein) (Single-strand RNA-binding protein) (hnRNP core protein A1) [Cleaved into: Heterogeneous nuclear ribonucleoprotein A1, N-terminally processed]	3178	P09651	SSGPyGGGGQYFAKPR	R	N	3.17	0.522	2.89	337	341	P09651-341	2
Jun-1AB	HNRNPA1	Heterogeneous nuclear ribonucleoprotein A1 (hnRNP A1) (Helix-destabilizing protein) (Single-strand RNA-binding protein) (hnRNP core protein A1) [Cleaved into: Heterogeneous nuclear ribonucleoprotein A1, N-terminally processed]	3178	P09651	NQGGyGGSSSSSSYGSGR	R	R	4.61	0.455	0.721	353	357	P09651-357	6
Jun-1AB	HNRNPA1	Heterogeneous nuclear ribonucleoprotein A1 (hnRNP A1) (Helix-destabilizing protein) (Single-strand RNA-binding protein) (hnRNP core protein A1) [Cleaved into: Heterogeneous nuclear ribonucleoprotein A1, N-terminally processed]	3178	P09651	NQGGYGGSSSSSSyGSGR	R	R	4.45	0.69	7	353	366	P09651-366	2
Jun-1AB	HSPD1	60 kDa heat shock protein, mitochondrial (60 kDa chaperonin) (Chaperonin 60) (CPN60) (Heat shock protein 60) (HSP-60) (Hsp60) (HuCHA60) (Mitochondrial matrix protein P1) (P60 lymphocyte protein)	3329	P10809	GYISPyFINTSK	R	G	3.13	0.174	1.66	222	227	P10809-227	4
Jun-1AB	HSPD1	60 kDa heat shock protein, mitochondrial (60 kDa chaperonin) (Chaperonin 60) (CPN60) (Heat shock protein 60) (HSP-60) (Hsp60) (HuCHA60) (Mitochondrial matrix protein P1) (P60 lymphocyte protein)	3329	P10809	IMQSSSEVGyDAMAGDFVNMVEK	K	G	5.36	0.634	4.85	494	503	P10809-503	14
Jun-1AB	PDHB	Pyruvate dehydrogenase E1 component subunit beta, mitochondrial (PDHE1-B) (EC 1.2.4.1)	5162	P11177	VFLLGEEVAQyDGAYK	K	V	4.54	0.582	9.68	53	63	P11177-63	3
Jun-1AB	PC	Pyruvate carboxylase, mitochondrial (EC 6.4.1.1) (Pyruvic carboxylase) (PCB)	5091	P11498	FLyEcPWR	R	R	2.2	0.0177	1.25	618	620	P11498-620	1
Jun-1AB	PC	Pyruvate carboxylase, mitochondrial (EC 6.4.1.1) (Pyruvic carboxylase) (PCB)	5091	P11498	SVVEFLQGyIGVPHGGFPEPFR	R	S	2.84	0.357	1.39	943	951	P11498-951	2
Jun-1AB	ETFA	Electron transfer flavoprotein subunit alpha, mitochondrial (Alpha-ETF)	2108	P13804	TIyAGNALcTVK	R	C	3	0.363	3.44	147	149	P13804-149	2
Jun-1AB	MTHFD2	Bifunctional methylenetetrahydrofolate dehydrogenase/cyclohydrolase, mitochondrial [Includes: NAD-dependent methylenetetrahydrofolate dehydrogenase (EC 1.5.1.15); Methenyltetrahydrofolate cyclohydrolase (EC 3.5.4.9)]	10797	P13995	RPHLSVILVGENPASHSyVLNK	K	T	4.73	0.532	2.42	67	84	P13995-84	4
Jun-1AB	COX7C	Cytochrome c oxidase subunit 7C, mitochondrial (Cytochrome c oxidase polypeptide VIIc)	1350	P15954	SHyEEGPGK	R	N	3.52	0.443	0.886	17	19	P15954-19	5
Jun-1AB	H2AFX	Histone H2AX (H2a/x) (Histone H2A.X)	3014	P16104	ATQASQEy	K	-	2.99	0.487	1.68	136	143	P16104-143	6
Jun-1AB	ATP5J	ATP synthase-coupling factor 6, mitochondrial (ATPase subunit F6)	522	P18859	RQTSGGPVDASSEyQQELER	K	E	4.8	0.493	3.03	54	67	P18859-67	9
Jun-1AB	COX5A	Cytochrome c oxidase subunit 5A, mitochondrial (Cytochrome c oxidase polypeptide Va)	9377	P20674	WVTyFNKPDIDAWELR	R	K	2.08	0.163	1	56	59	P20674-59	1
Jun-1AB	COX5A	Cytochrome c oxidase subunit 5A, mitochondrial (Cytochrome c oxidase polypeptide Va)	9377	P20674	GINTLVTyDMVPEPK	K	I	3.61	0.448	3	73	80	P20674-80	10
Jun-1AB	HNRNPA2B1	Heterogeneous nuclear ribonucleoproteins A2/B1 (hnRNP A2/B1)	3181	P22626	GGSDGyGSGR	R	G	2.92	0.349	0.886	229	234	P22626-234	3
Jun-1AB	HNRNPA2B1	Heterogeneous nuclear ribonucleoproteins A2/B1 (hnRNP A2/B1)	3181	P22626	NMGGPyGGGNYGPGGSGGSGGYGGR	R	S	4.46	0.47	1.8	326	331	P22626-331	3
Jun-1AB	HNRNPA2B1	Heterogeneous nuclear ribonucleoproteins A2/B1 (hnRNP A2/B1)	3181	P22626	NMGGPYGGGNyGPGGSGGSGGYGGR	R	S	4.42	0.626	5.08	326	336	P22626-336	4
Jun-1AB	HNRNPA2B1	Heterogeneous nuclear ribonucleoproteins A2/B1 (hnRNP A2/B1)	3181	P22626	NMGGPYGGGNYGPGGSGGSGGyGGR	R	S	5.04	0.767	4.17	326	347	P22626-347	7
Jun-1AB	ME2	NAD-dependent malic enzyme, mitochondrial (NAD-ME) (EC 1.1.1.38) (Malic enzyme 2)	4200	P23368	ILGLGDLGVyGMGIPVGK	R	L	2.6	0.493	5	166	175	P23368-175	1
Jun-1AB	ME2	NAD-dependent malic enzyme, mitochondrial (NAD-ME) (EC 1.1.1.38) (Malic enzyme 2)	4200	P23368	yIYImGIQER	K	N	2.71	0.188	1	82	82	P23368-82	1
Jun-1AB	ME2	NAD-dependent malic enzyme, mitochondrial (NAD-ME) (EC 1.1.1.38) (Malic enzyme 2)	4200	P23368	YIyIMGIQER	K	N	3.1	0.456	1.22	82	84	P23368-84	4
Jun-1AB	ACAT1	Acetyl-CoA acetyltransferase, mitochondrial (EC 2.3.1.9) (Acetoacetyl-CoA thiolase) (T2)	38	P24752	NEQDAYAINSyTR	R	S	4.07	0.532	2.21	209	219	P24752-219	2
Jun-1AB	ATP5A1	ATP synthase subunit alpha, mitochondrial	498	P25705	LELAQyR	K	E	2.66	0.353	0.62	435	440	P25705-440	1
Jun-1AB	ATP5A1	ATP synthase subunit alpha, mitochondrial	498	P25705	QGQySPMAIEEQVAVIYAGVR	K	G	2.85	0.562	0.602	473	476	P25705-476	2
Jun-1AB	ALDH1B1	Aldehyde dehydrogenase X, mitochondrial (EC 1.2.1.3) (Aldehyde dehydrogenase 5) (Aldehyde dehydrogenase family 1 member B1)	219	P30837	VLGyIQLGQK	R	E	2.72	0.395	3.21	370	373	P30837-373	1
Jun-1AB	UQCRC1	Cytochrome b-c1 complex subunit 1, mitochondrial (Complex III subunit 1) (Core protein I) (Ubiquinol-cytochrome-c reductase complex core protein 1)	7384	P31930	EVESMGAHLNAySTR	K	E	3.27	0.434	2.06	112	123	P31930-123	2
Jun-1AB	UQCRC1	Cytochrome b-c1 complex subunit 1, mitochondrial (Complex III subunit 1) (Core protein I) (Ubiquinol-cytochrome-c reductase complex core protein 1)	7384	P31930	HLGGIPWTyAEDAVPTLTPcR	K	F	2.85	0.238	1.43	249	257	P31930-257	1
Jun-1AB	SHMT2	Serine hydroxymethyltransferase, mitochondrial (SHMT) (EC 2.1.2.1) (Glycine hydroxymethyltransferase) (Serine methylase)	6472	P34897	yYGGAEVVDEIELLcQR	R	R	4.55	0.656	5.66	105	105	P34897-105	3
Jun-1AB	TAGLN2	Transgelin-2 (Epididymis tissue protein Li 7e) (SM22-alpha homolog)	8407	P37802	GASQAGmTGyGMPR	R	Q	3.8	0.541	0.854	183	192	P37802-192	10
Jun-1AB	RBMX	RNA-binding motif protein, X chromosome (Glycoprotein p43) (Heterogeneous nuclear ribonucleoprotein G) (hnRNP G) [Cleaved into: RNA-binding motif protein, X chromosome, N-terminally processed]	27316	P38159	DRDySDHPSGGSYR	R	D	2.37	0.422	0	269	272	P38159-272	1
Jun-1AB	HSPA9	Stress-70 protein, mitochondrial (75 kDa glucose-regulated protein) (GRP-75) (Heat shock 70 kDa protein 9) (Mortalin) (MOT) (Peptide-binding protein 74) (PBP74)	3313	P38646	RQAVTNPNNTFyATKR	K	L	3.5	0.432	0	107	118	P38646-118	4
Jun-1AB	HSPA9	Stress-70 protein, mitochondrial (75 kDa glucose-regulated protein) (GRP-75) (Heat shock 70 kDa protein 9) (Mortalin) (MOT) (Peptide-binding protein 74) (PBP74)	3313	P38646	LySPSQIGAFVLMK	K	M	3.87	0.504	6.16	160	161	P38646-161	5
Jun-1AB	HSPA9	Stress-70 protein, mitochondrial (75 kDa glucose-regulated protein) (GRP-75) (Heat shock 70 kDa protein 9) (Mortalin) (MOT) (Peptide-binding protein 74) (PBP74)	3313	P38646	NAVITVPAyFNDSQR	K	Q	2.99	0.293	6.82	188	196	P38646-196	2
Jun-1AB	HSPA9	Stress-70 protein, mitochondrial (75 kDa glucose-regulated protein) (GRP-75) (Heat shock 70 kDa protein 9) (Mortalin) (MOT) (Peptide-binding protein 74) (PBP74)	3313	P38646	NAEKyAEEDR	K	R	2.91	0.407	0	564	568	P38646-568	1
Jun-1AB	MDH2	Malate dehydrogenase, mitochondrial (EC 1.1.1.37)	4191	P40926	HGVyNPNKIFGVTTLDIVR	K	A	2.12	-0.0285	2.05	158	161	P40926-161	1
Jun-1AB	LRPPRC	Leucine-rich PPR motif-containing protein, mitochondrial (130 kDa leucine-rich protein) (LRP 130) (GP130)	10128	P42704	LLMSEDyFTQAMEVK	K	A	3.05	0.367	0	1076	1082	P42704-1082	1
Jun-1AB	LRPPRC	Leucine-rich PPR motif-containing protein, mitochondrial (130 kDa leucine-rich protein) (LRP 130) (GP130)	10128	P42704	VIEPQyFGLAYLFR	K	K	3.24	0.548	4.8	1210	1215	P42704-1215	3
Jun-1AB	LRPPRC	Leucine-rich PPR motif-containing protein, mitochondrial (130 kDa leucine-rich protein) (LRP 130) (GP130)	10128	P42704	SyVSEKDVTSAK	K	A	2.69	0.384	3.32	1327	1328	P42704-1328	1
Jun-1AB	ATP5O	ATP synthase subunit O, mitochondrial (Oligomycin sensitivity conferral protein) (OSCP)	539	P48047	LVRPPVQVyGIEGR	K	Y	3.56	0.529	5.43	27	35	P48047-35	14
Jun-1AB	ATP5O	ATP synthase subunit O, mitochondrial (Oligomycin sensitivity conferral protein) (OSCP)	539	P48047	VAASVLNPyVKR	K	S	2.86	0.258	1.24	74	82	P48047-82	4
Jun-1AB	TUFM	Elongation factor Tu, mitochondrial (EF-Tu) (P43)	7284	P49411	LLDAVDTyIPVPAR	K	D	2.86	0.488	6	239	246	P49411-246	6
Jun-1AB	ACTB	Actin, cytoplasmic 1 (Beta-actin) [Cleaved into: Actin, cytoplasmic 1, N-terminally processed]	60	P60709	TTGIVMDSGDGVTHTVPIYEGyALPHAILR	R	L	3.93	0.467	2.11	148	169	P60709-169	7
Jun-1AB	ACTB	Actin, cytoplasmic 1 (Beta-actin) [Cleaved into: Actin, cytoplasmic 1, N-terminally processed]	60	P60709	ILTERGySFTTTAER	K	E	2.22	0.3	0.886	192	198	P60709-198	1
Jun-1AB	ACTB	Actin, cytoplasmic 1 (Beta-actin) [Cleaved into: Actin, cytoplasmic 1, N-terminally processed]	60	P60709	IWHHTFyNELR	K	V	2.16	0	1.62	85	91	P60709-91	1
Jun-1AB	RPS3A	40S ribosomal protein S3a (v-fos transformation effector protein) (Fte-1)	6189	P61247	VERADGyEPPVQESV	K	-	2.82	0.491	1.54	250	256	P61247-256	2
Jun-1AB	HSPE1	10 kDa heat shock protein, mitochondrial (Hsp10) (10 kDa chaperonin) (Chaperonin 10) (CPN10) (Early-pregnancy factor) (EPF)	3336	P61604	DGDILGKyVD	R	-	2.29	0.181	1.7	93	100	P61604-100	1
Jun-1AB	HSPE1	10 kDa heat shock protein, mitochondrial (Hsp10) (10 kDa chaperonin) (Chaperonin 10) (CPN10) (Early-pregnancy factor) (EPF)	3336	P61604	VLLPEyGGTK	K	V	2.4	0.343	1.92	71	76	P61604-76	9
Jun-1AB	HIST1H4A	Histone H4	8359	P62805	TVTAMDVVyALKR	K	Q	3.73	0.418	1.52	81	89	P62805-89	7
Jun-1AB	EIF5A	Eukaryotic translation initiation factor 5A-1 (eIF-5A-1) (eIF-5A1) (Eukaryotic initiation factor 5A isoform 1) (eIF-5A) (Rev-binding factor) (eIF-4D)	1984	P63241	NDFQLIGIQDGyLSLLQDSGEVR	R	E	3.91	0.483	3.7	87	98	P63241-98	5
Jun-1AB	RBM3	RNA-binding protein 3 (RNA-binding motif protein 3) (RNPL)	5935	P98179	YYDSRPGGyGYGYGR	R	S	2.78	0.598	0	117	125	P98179-125	1
Jun-1AB	RBM3	RNA-binding protein 3 (RNA-binding motif protein 3) (RNPL)	5935	P98179	YYDSRPGGYGYGyGR	R	S	2.91	0.463	2.12	117	129	P98179-129	1
Jun-1AB	TFAM	Transcription factor A, mitochondrial (mtTFA) (Mitochondrial transcription factor 1) (MtTF1) (Transcription factor 6) (TCF-6) (Transcription factor 6-like 2)	7019	Q00059	SAyNVYVAER	R	F	3.58	0.352	3.06	160	162	Q00059-162	5
Jun-1AB	SSBP1	Single-stranded DNA-binding protein, mitochondrial (Mt-SSB) (MtSSB) (PWP1-interacting protein 17)	6742	Q04837	DVAYQyVK	R	K	3.09	0.461	1.21	96	101	Q04837-101	2
Jun-1AB	SSBP1	Single-stranded DNA-binding protein, mitochondrial (Mt-SSB) (MtSSB) (PWP1-interacting protein 17)	6742	Q04837	IDYGEyMDKNNVR	K	R	3.43	0.394	3.06	114	119	Q04837-119	4
Jun-1AB	SSBP1	Single-stranded DNA-binding protein, mitochondrial (Mt-SSB) (MtSSB) (PWP1-interacting protein 17)	6742	Q04837	SGDSEVyQLGDVSQK	R	T	5.01	0.581	2.46	67	73	Q04837-73	12
Jun-1AB	SSBP1	Single-stranded DNA-binding protein, mitochondrial (Mt-SSB) (MtSSB) (PWP1-interacting protein 17)	6742	Q04837	DVAyQYVK	R	K	2.29	0.403	0.62	96	99	Q04837-99	1
Jun-1AB	GRSF1	G-rich sequence factor 1 (GRSF-1)	2926	Q12849	ITMEySSSGK	R	A	2.87	0.49	0	429	433	Q12849-433	2
Jun-1AB	TRAP1	Heat shock protein 75 kDa, mitochondrial (HSP 75) (TNFR-associated protein 1) (Tumor necrosis factor type 1 receptor-associated protein) (TRAP-1)	10131	Q12931	ELGSSVALySR	R	K	2.66	0.434	1.7	358	366	Q12931-366	2
Jun-1AB	ECH1	Delta(3,5)-Delta(2,4)-dienoyl-CoA isomerase, mitochondrial (EC 5.3.3.-)	1891	Q13011	DIITRyQETFNVIER	R	C	3.73	0.356	0.921	144	149	Q13011-149	5
Jun-1AB	ECH1	Delta(3,5)-Delta(2,4)-dienoyl-CoA isomerase, mitochondrial (EC 5.3.3.-)	1891	Q13011	DHSVAESLNyVASWNMSMLQTQDLVK	R	S	3.45	0.534	0	284	293	Q13011-293	2
Jun-1AB	CIRBP	Cold-inducible RNA-binding protein (A18 hnRNP) (Glycine-rich RNA-binding protein CIRP)	1153	Q14011	SQSGGySDR	R	S	1.98	0.214	3.72	146	151	Q14011-151	1
Jun-1AB	CIRBP	Cold-inducible RNA-binding protein (A18 hnRNP) (Glycine-rich RNA-binding protein CIRP)	1153	Q14011	SSGGSyRDSYDSYATHNE	R	-	1.56	0.718	0	155	160	Q14011-160	1
Jun-1AB	HADH	Hydroxyacyl-coenzyme A dehydrogenase, mitochondrial (HCDH) (EC 1.1.1.35) (Medium and short-chain L-3-hydroxyacyl-coenzyme A dehydrogenase) (Short-chain 3-hydroxyacyl-CoA dehydrogenase)	3033	Q16836	LLVPyLMEAIR	R	L	2.43	0.43	1.77	222	226	Q16836-226	2
Jun-1AB	HADH	Hydroxyacyl-coenzyme A dehydrogenase, mitochondrial (HCDH) (EC 1.1.1.35) (Medium and short-chain L-3-hydroxyacyl-coenzyme A dehydrogenase) (Short-chain 3-hydroxyacyl-CoA dehydrogenase)	3033	Q16836	LGAGyPMGPFELLDYVGLDTTK	K	F	2.94	0.524	5.47	250	254	Q16836-254	2
Jun-1AB	CYP51A1	Lanosterol 14-alpha demethylase (LDM) (EC 1.14.13.70) (CYPLI) (Cytochrome P450 51A1) (Cytochrome P450-14DM) (Cytochrome P45014DM) (Cytochrome P450LI) (Sterol 14-alpha demethylase)	1595	Q16850	NEDLNAEDVySR	K	L	4.41	0.468	5.14	122	131	Q16850-131	3
Jun-1AB	IMMT	MICOS complex subunit MIC60 (Cell proliferation-inducing gene 4/52 protein) (Mitochondrial inner membrane protein) (Mitofilin) (p87/89)	10989	Q16891	ySTSGSSGLTTGK	R	I	3.66	0.541	2.96	33	33	Q16891-33	8
Jun-1AB	GLRX5	Glutaredoxin-related protein 5, mitochondrial (Monothiol glutaredoxin-5)	51218	Q86SX6	LHGVRDyAAYNVLDDPELR	R	Q	3.36	0.393	1.59	79	85	Q86SX6-85	1
Jun-1AB	GLRX5	Glutaredoxin-related protein 5, mitochondrial (Monothiol glutaredoxin-5)	51218	Q86SX6	DYAAyNVLDDPELR	R	Q	3.52	0.543	3.38	84	88	Q86SX6-88	1
Jun-1AB	GADD45GIP1	Growth arrest and DNA damage-inducible proteins-interacting protein 1 (39S ribosomal protein L59, mitochondrial) (MRP-L59) (CKII beta-associating protein) (CR6-interacting factor 1) (CRIF1) (Papillomavirus L2-interacting nuclear protein 1) (PLINP) (PLINP-1) (p53-responsive gene 6 protein)	90480	Q8TAE8	LQAEAQELLGyQVDPR	R	S	3.88	0.536	4.82	156	166	Q8TAE8-166	9
Jun-1AB	GADD45GIP1	Growth arrest and DNA damage-inducible proteins-interacting protein 1 (39S ribosomal protein L59, mitochondrial) (MRP-L59) (CKII beta-associating protein) (CR6-interacting factor 1) (CRIF1) (Papillomavirus L2-interacting nuclear protein 1) (PLINP) (PLINP-1) (p53-responsive gene 6 protein)	90480	Q8TAE8	ELEAEEREWyPSLATMQESLR	R	V	3.29	0.37	0	84	93	Q8TAE8-93	3
Jun-1AB	TAF15	TATA-binding protein-associated factor 2N (68 kDa TATA-binding protein-associated factor) (TAF(II)68) (TAFII68) (RNA-binding protein 56)	8148	Q92804	SGGGyGGDR	R	S	3.23	0.419	3.17	423	427	Q92804-427	2
Jun-1AB	TAF15	TATA-binding protein-associated factor 2N (68 kDa TATA-binding protein-associated factor) (TAF(II)68) (TAFII68) (RNA-binding protein 56)	8148	Q92804	SSGGGySGDR	R	S	2.08	0	2.74	432	437	Q92804-437	1
Jun-1AB	TAF15	TATA-binding protein-associated factor 2N (68 kDa TATA-binding protein-associated factor) (TAF(II)68) (TAFII68) (RNA-binding protein 56)	8148	Q92804	SGGyGGDR	R	S	1.97	0.0296	3.82	546	549	Q92804-549	1
Jun-1AB	USMG5	Up-regulated during skeletal muscle growth protein 5 (Diabetes-associated protein in insulin-sensitive tissues) (HCV F-transactivated protein 2)	84833	Q96IX5	AGPESDAQyQFTGIK	M	K	0	0	6.62	2	10	Q96IX5-10	3
Jun-1AB	USMG5	Up-regulated during skeletal muscle growth protein 5 (Diabetes-associated protein in insulin-sensitive tissues) (HCV F-transactivated protein 2)	84833	Q96IX5	YFNSyTLTGR	K	M	3.32	0.435	3.7	18	22	Q96IX5-22	8
Jun-1AB	HNRNPAB	Heterogeneous nuclear ribonucleoprotein A/B (hnRNP A/B) (APOBEC1-binding protein 1) (ABBP-1)	3182	Q99729	EVYQQQQyGSGGR	K	G	3.18	0.537	1.35	233	240	Q99729-240	2
Jun-1AB	NIPSNAP1	Protein NipSnap homolog 1 (NipSnap1)	8508	Q9BPW8	GWDENVYyTVPLVR	R	H	2.83	0.382	0.959	255	262	Q9BPW8-262	2
Jun-1AB	NDUFAF3	NADH dehydrogenase [ubiquinone] 1 alpha subcomplex assembly factor 3	25915	Q9BU61	LSPADDELyQR	R	T	3.16	0.394	3.28	34	42	Q9BU61-42	2
Jun-1AB	NDUFAF3	NADH dehydrogenase [ubiquinone] 1 alpha subcomplex assembly factor 3	25915	Q9BU61	EAAQAmyIDSYNSR	R	G	2.9	0.538	1.15	53	59	Q9BU61-59	1
Jun-1AB	GRPEL1	GrpE protein homolog 1, mitochondrial (HMGE) (Mt-GrpE#1)	80273	Q9HAV7	FDPyEHEALFHTPVEGK	K	E	4.16	0.335	0	170	173	Q9HAV7-173	4
Jun-1AB	MCCC2	Methylcrotonoyl-CoA carboxylase beta chain, mitochondrial (MCCase subunit beta) (EC 6.4.1.4) (3-methylcrotonyl-CoA carboxylase 2) (3-methylcrotonyl-CoA carboxylase non-biotin-containing subunit) (3-methylcrotonyl-CoA:carbon dioxide ligase subunit beta)	64087	Q9HCC0	IFGyPVGIVGNNGVLFSESAK	R	K	2.04	0.0639	0.585	362	365	Q9HCC0-365	3
Jun-1AB	MCCC2	Methylcrotonoyl-CoA carboxylase beta chain, mitochondrial (MCCase subunit beta) (EC 6.4.1.4) (3-methylcrotonyl-CoA carboxylase 2) (3-methylcrotonyl-CoA carboxylase non-biotin-containing subunit) (3-methylcrotonyl-CoA:carbon dioxide ligase subunit beta)	64087	Q9HCC0	NIPLLFLQNITGFMVGREyEAEGIAK	R	D	4.3	0.521	4.82	395	413	Q9HCC0-413	1
Jun-1AB	ABHD10	Mycophenolic acid acyl-glucuronide esterase, mitochondrial (EC 3.1.1.93) (Alpha/beta hydrolase domain-containing protein 10) (Abhydrolase domain-containing protein 10)	55347	Q9NUJ1	YSEEGVyNVQYSFIK	K	E	4.12	0.613	4.41	209	215	Q9NUJ1-215	3
Jun-1AB	ABHD10	Mycophenolic acid acyl-glucuronide esterase, mitochondrial (EC 3.1.1.93) (Alpha/beta hydrolase domain-containing protein 10) (Abhydrolase domain-containing protein 10)	55347	Q9NUJ1	SPGIIFIPGYLSyMNGTK	K	A	2.44	0.307	1.05	75	87	Q9NUJ1-87	1
Jun-1AB	ATPIF1	ATPase inhibitor, mitochondrial (Inhibitor of F(1)F(o)-ATPase) (IF(1)) (IF1)	93974	Q9UII2	REQAEEERyFR	K	A	2.46	0.398	0	50	58	Q9UII2-58	3

## Sheet: M3
Replicate	Gene Name	Gene Description	Entrez ID	UNIPROT ID	Peptide sequence	Previous amino acid	Next amino acid	SEQUEST XCorr score	SEQUEST DCn score	X! Tandem -log(e) score	Peptide START	Labeling site	UNIPROT-site	Unique Spectrum Count
JUL-1AB	UQCRQ	Cytochrome b-c1 complex subunit 8 (Complex III subunit 8) (Complex III subunit VIII) (Ubiquinol-cytochrome c reductase complex 9.5 kDa protein) (Ubiquinol-cytochrome c reductase complex ubiquinone-binding protein QP-C)	27089	O14949	HVISySLSPFEQR	R	A	4.79	0.564	3.3	13	17	O14949-17	12
JUL-1AB	NDUFA2	NADH dehydrogenase [ubiquinone] 1 alpha subcomplex subunit 2 (Complex I-B8) (CI-B8) (NADH-ubiquinone oxidoreductase B8 subunit)	4695	O43678	LWARyAFGQETNVPLNNFSADQVTR	K	A	5.55	0.547	4.82	65	69	O43678-69	5
JUL-1AB	CS	Citrate synthase, mitochondrial (EC 2.3.3.1) (Citrate (Si)-synthase)	1431	O75390	NLyREGSGIGAIDSNLDWSHNFTNMLGYTDHQFTELTR	R	L	4.76	0.474	1.62	219	221	O75390-221	2
JUL-1AB	CS	Citrate synthase, mitochondrial (EC 2.3.3.1) (Citrate (Si)-synthase)	1431	O75390	LVAQLyKIVPNVLLEQGK	K	A	3.1	0.58	2.42	376	381	O75390-381	3
JUL-1AB	ATP5H	ATP synthase subunit d, mitochondrial (ATPase subunit d)	10476	O75947	LAALPENPPAIDWAyYK	R	A	2.35	0.421	1.77	42	56	O75947-56	1
JUL-1AB	GLS	Glutaminase kidney isoform, mitochondrial (GLS) (EC 3.5.1.2) (K-glutaminase) (L-glutamine amidohydrolase)	2744	O94925-3	HSFGPLDyESLQQELALK	R	E	3.16	0.419	0	551	558	O94925-3-558	1
JUL-1AB	GLS	Glutaminase kidney isoform, mitochondrial (GLS) (EC 3.5.1.2) (K-glutaminase) (L-glutamine amidohydrolase)	2744	O94925-3	VSPESNEDISTTVVyR	K	M	3.67	0.458	5.62	575	589	O94925-3-589	8
JUL-1AB	LETM1	LETM1 and EF-hand domain-containing protein 1, mitochondrial (Leucine zipper-EF-hand-containing transmembrane protein 1)	3954	O95202	LEEGGPVySPPAEVVVK	K	K	4.45	0.518	0	134	141	O95202-141	7
JUL-1AB	LETM1	LETM1 and EF-hand domain-containing protein 1, mitochondrial (Leucine zipper-EF-hand-containing transmembrane protein 1)	3954	O95202	AMyLPDTLSPADQLK	R	S	4.03	0.567	4.89	420	422	O95202-422	4
JUL-1AB	ALDOA	Fructose-bisphosphate aldolase A (EC 4.1.2.13) (Lung cancer antigen NY-LU-1) (Muscle-type aldolase)	226	P04075	YTPSGQAGAAASESLFVSNHAy	K	-	4.76	0.573	7.38	343	364	P04075-364	2
JUL-1AB	OAT	Ornithine aminotransferase, mitochondrial (EC 2.6.1.13) (Ornithine delta-aminotransferase) (Ornithine--oxo-acid aminotransferase) [Cleaved into: Ornithine aminotransferase, hepatic form; Ornithine aminotransferase, renal form]	4942	P04181	AFyNNVLGEYEEYITK	R	L	2.03	0.209	1.34	114	116	P04181-116	1
JUL-1AB	OAT	Ornithine aminotransferase, mitochondrial (EC 2.6.1.13) (Ornithine delta-aminotransferase) (Ornithine--oxo-acid aminotransferase) [Cleaved into: Ornithine aminotransferase, hepatic form; Ornithine aminotransferase, renal form]	4942	P04181	TVQGPPTSDDIFEREyKYGAHNYHPLPVALER	K	G	3.11	0.431	0	33	48	P04181-48	1
JUL-1AB	ATP5B	ATP synthase subunit beta, mitochondrial (EC 3.6.3.14)	506	P06576	AHGGySVFAGVGER	K	T	3.41	0.503	2.2	226	230	P06576-230	4
JUL-1AB	ATP5B	ATP synthase subunit beta, mitochondrial (EC 3.6.3.14)	506	P06576	IPSAVGyQPTLATDMGTMQER	R	I	4.09	0.418	1.09	325	331	P06576-331	1
JUL-1AB	ATP5B	ATP synthase subunit beta, mitochondrial (EC 3.6.3.14)	506	P06576	AIAELGIyPAVDPLDSTSR	R	I	3.37	0.562	3.17	388	395	P06576-395	6
JUL-1AB	ATP5B	ATP synthase subunit beta, mitochondrial (EC 3.6.3.14)	506	P06576	IMDPNIVGSEHyDVAR	R	G	1.99	0	0.854	407	418	P06576-418	1
JUL-1AB	PDHA1	Pyruvate dehydrogenase E1 component subunit alpha, somatic form, mitochondrial (EC 1.2.4.1) (PDHE1-A type I)	5160	P08559	YHGHSMSDPGVSyR	R	T	2.33	0.447	0.921	289	301	P08559-301	1
JUL-1AB	HNRNPA1	Heterogeneous nuclear ribonucleoprotein A1 (hnRNP A1) (Helix-destabilizing protein) (Single-strand RNA-binding protein) (hnRNP core protein A1) [Cleaved into: Heterogeneous nuclear ribonucleoprotein A1, N-terminally processed]	3178	P09651	NQGGyGGSSSSSSYGSGR	R	R	2.64	0.644	3	353	357	P09651-357	1
JUL-1AB	HNRNPA1	Heterogeneous nuclear ribonucleoprotein A1 (hnRNP A1) (Helix-destabilizing protein) (Single-strand RNA-binding protein) (hnRNP core protein A1) [Cleaved into: Heterogeneous nuclear ribonucleoprotein A1, N-terminally processed]	3178	P09651	NQGGYGGSSSSSSyGSGR	R	R	3.58	0.705	3.01	353	366	P09651-366	2
JUL-1AB	HSPA1A	Heat shock 70 kDa protein 1A (Heat shock 70 kDa protein 1) (HSP70-1) (HSP70.1)	3303	P0DMV8	ELEQVcNPIISGLyQGAGGPGPGGFGAQGPK	K	G	4.29	0.401	1.74	598	611	P0DMV8-611	1
JUL-1AB	HSPD1	60 kDa heat shock protein, mitochondrial (60 kDa chaperonin) (Chaperonin 60) (CPN60) (Heat shock protein 60) (HSP-60) (Hsp60) (HuCHA60) (Mitochondrial matrix protein P1) (P60 lymphocyte protein)	3329	P10809	GYISPyFINTSK	R	G	2.94	0.419	3.55	222	227	P10809-227	1
JUL-1AB	HSPD1	60 kDa heat shock protein, mitochondrial (60 kDa chaperonin) (Chaperonin 60) (CPN60) (Heat shock protein 60) (HSP-60) (Hsp60) (HuCHA60) (Mitochondrial matrix protein P1) (P60 lymphocyte protein)	3329	P10809	IQEIIEQLDVTTSEyEKEK	R	L	4.85	0.527	10.1	371	385	P10809-385	7
JUL-1AB	HSPD1	60 kDa heat shock protein, mitochondrial (60 kDa chaperonin) (Chaperonin 60) (CPN60) (Heat shock protein 60) (HSP-60) (Hsp60) (HuCHA60) (Mitochondrial matrix protein P1) (P60 lymphocyte protein)	3329	P10809	IMQSSSEVGyDAMAGDFVNMVEK	K	G	6.04	0.646	4.2	494	503	P10809-503	7
JUL-1AB	PDHB	Pyruvate dehydrogenase E1 component subunit beta, mitochondrial (PDHE1-B) (EC 1.2.4.1)	5162	P11177	VFLLGEEVAQyDGAYK	K	V	4.89	0.656	7.1	53	63	P11177-63	4
JUL-1AB	MTHFD2	Bifunctional methylenetetrahydrofolate dehydrogenase/cyclohydrolase, mitochondrial [Includes: NAD-dependent methylenetetrahydrofolate dehydrogenase (EC 1.5.1.15); Methenyltetrahydrofolate cyclohydrolase (EC 3.5.4.9)]	10797	P13995	QKAGyITPVPGGVGPMTVAMLMK	R	N	3.1	0.35	1.68	300	304	P13995-304	1
JUL-1AB	MTHFD2	Bifunctional methylenetetrahydrofolate dehydrogenase/cyclohydrolase, mitochondrial [Includes: NAD-dependent methylenetetrahydrofolate dehydrogenase (EC 1.5.1.15); Methenyltetrahydrofolate cyclohydrolase (EC 3.5.4.9)]	10797	P13995	RPHLSVILVGENPASHSyVLNK	K	T	5.32	0.528	2.39	67	84	P13995-84	16
JUL-1AB	HNRNPL	Heterogeneous nuclear ribonucleoprotein L (hnRNP L)	3191	P14866	MAAAGGGGGGGRYyGGGSEGGR	K	A	2.57	0.493	3.3	35	48	P14866-48	2
JUL-1AB	ATP5J	ATP synthase-coupling factor 6, mitochondrial (ATPase subunit F6)	522	P18859	QTSGGPVDASSEyQQELER	R	E	4.35	0.546	2.4	55	67	P18859-67	7
JUL-1AB	COX5A	Cytochrome c oxidase subunit 5A, mitochondrial (Cytochrome c oxidase polypeptide Va)	9377	P20674	EIyPYVIQELRPTLNELGISTPEELGLDKV	K	-	3.45	0.505	1.42	121	123	P20674-123	1
JUL-1AB	COX5A	Cytochrome c oxidase subunit 5A, mitochondrial (Cytochrome c oxidase polypeptide Va)	9377	P20674	AGPHKEIYPyVIQELRPTLNELGISTPEELGLDKV	K	-	3.29	0.524	3.92	116	125	P20674-125	1
JUL-1AB	COX5A	Cytochrome c oxidase subunit 5A, mitochondrial (Cytochrome c oxidase polypeptide Va)	9377	P20674	WVTyFNKPDIDAWELRK	R	G	3.37	0.469	0	56	59	P20674-59	3
JUL-1AB	COX5A	Cytochrome c oxidase subunit 5A, mitochondrial (Cytochrome c oxidase polypeptide Va)	9377	P20674	GINTLVTyDMVPEPK	K	I	3.1	0.354	2.62	73	80	P20674-80	2
JUL-1AB	MUT	Methylmalonyl-CoA mutase, mitochondrial (MCM) (EC 5.4.99.2) (Methylmalonyl-CoA isomerase)	4594	P22033	AGQQGLSVAFDLATHRGyDSDNPR	K	V	3.13	0.36	3.82	129	146	P22033-146	1
JUL-1AB	HNRNPA2B1	Heterogeneous nuclear ribonucleoproteins A2/B1 (hnRNP A2/B1)	3181	P22626	GFGDGyNGYGGGPGGGNFGGSPGYGGGR	R	G	3.87	0.66	1.54	239	244	P22626-244	1
JUL-1AB	HNRNPA2B1	Heterogeneous nuclear ribonucleoproteins A2/B1 (hnRNP A2/B1)	3181	P22626	NMGGPYGGGNYGPGGSGGSGGyGGR	R	S	3.83	0.504	1.72	326	347	P22626-347	1
JUL-1AB	UQCRC2	Cytochrome b-c1 complex subunit 2, mitochondrial (Complex III subunit 2) (Core protein II) (Ubiquinol-cytochrome-c reductase complex core protein 2)	7385	P22695	LPNGLVIASLENySPVSR	K	I	3.53	0.579	3.35	43	55	P22695-55	2
JUL-1AB	ME2	NAD-dependent malic enzyme, mitochondrial (NAD-ME) (EC 1.1.1.38) (Malic enzyme 2)	4200	P23368	YIyIMGIQER	K	N	2.63	0.374	2.66	82	84	P23368-84	1
JUL-1AB	ACAT1	Acetyl-CoA acetyltransferase, mitochondrial (EC 2.3.1.9) (Acetoacetyl-CoA thiolase) (T2)	38	P24752	GSTPyGGVKLEDLIVK	R	D	2.65	0.276	1.62	166	170	P24752-170	1
JUL-1AB	ACAT1	Acetyl-CoA acetyltransferase, mitochondrial (EC 2.3.1.9) (Acetoacetyl-CoA thiolase) (T2)	38	P24752	IVAFADAAVEPIDFPIAPVyAASMVLK	R	D	5.18	0.407	4.42	312	331	P24752-331	1
JUL-1AB	ATP5A1	ATP synthase subunit alpha, mitochondrial	498	P25705	LELAQyREVAAFAQFGSDLDAATQQLLSR	K	G	5.45	0.514	6.44	435	440	P25705-440	4
JUL-1AB	ATP5A1	ATP synthase subunit alpha, mitochondrial	498	P25705	QGQySPMAIEEQVAVIYAGVR	K	G	3.89	0.443	0	473	476	P25705-476	3
JUL-1AB	C21orf33	ES1 protein homolog, mitochondrial	8209	P30042	GVEVTVGHEQEEGGKWPyAGTAEAIK	R	A	5.03	0.449	4.1	189	206	P30042-206	7
JUL-1AB	C21orf33	ES1 protein homolog, mitochondrial	8209	P30042	VVTTPAFMcETALHyIHDGIGAMVR	K	K	2.28	0.311	2.19	236	250	P30042-250	1
JUL-1AB	PRDX3	Thioredoxin-dependent peroxide reductase, mitochondrial (EC 1.11.1.15) (Antioxidant protein 1) (AOP-1) (HBC189) (Peroxiredoxin III) (Prx-III) (Peroxiredoxin-3) (Protein MER5 homolog)	10935	P30048	AFQyVETHGEVcPANWTPDSPTIKPSPAASK	K	E	5.03	0.549	7.46	218	221	P30048-221	4
JUL-1AB	PRDX3	Thioredoxin-dependent peroxide reductase, mitochondrial (EC 1.11.1.15) (Antioxidant protein 1) (AOP-1) (HBC189) (Peroxiredoxin III) (Prx-III) (Peroxiredoxin-3) (Protein MER5 homolog)	10935	P30048	AFQYVETHGEVcPANWTPDSPTIKPSPAASKEyFQKVNQ	K	-	3.5	0.123	3.31	218	250	P30048-250	3
JUL-1AB	ALDH1B1	Aldehyde dehydrogenase X, mitochondrial (EC 1.2.1.3) (Aldehyde dehydrogenase 5) (Aldehyde dehydrogenase family 1 member B1)	219	P30837	ANNTRyGLAAAVFTR	R	D	3.31	0.425	0	437	442	P30837-442	2
JUL-1AB	SDHA	Succinate dehydrogenase [ubiquinone] flavoprotein subunit, mitochondrial (EC 1.3.5.1) (Flavoprotein subunit of complex II) (Fp)	6389	P31040	TLNEADcATVPPAIRSy	K	-	2.64	0.396	2.08	648	664	P31040-664	1
JUL-1AB	UQCRC1	Cytochrome b-c1 complex subunit 1, mitochondrial (Complex III subunit 1) (Core protein I) (Ubiquinol-cytochrome-c reductase complex core protein 1)	7384	P31930	EVESMGAHLNAySTR	K	E	2.98	0.579	1.89	112	123	P31930-123	2
JUL-1AB	UQCRC1	Cytochrome b-c1 complex subunit 1, mitochondrial (Complex III subunit 1) (Core protein I) (Ubiquinol-cytochrome-c reductase complex core protein 1)	7384	P31930	HLGGIPWTyAEDAVPTLTPcR	K	F	3.7	0.302	1.8	249	257	P31930-257	1
JUL-1AB	SHMT2	Serine hydroxymethyltransferase, mitochondrial (SHMT) (EC 2.1.2.1) (Glycine hydroxymethyltransferase) (Serine methylase)	6472	P34897	IMGLDLPDGGHLTHGyMSDVKR	R	I	2.76	0.291	1.92	161	176	P34897-176	2
JUL-1AB	HSPA9	Stress-70 protein, mitochondrial (75 kDa glucose-regulated protein) (GRP-75) (Heat shock 70 kDa protein 9) (Mortalin) (MOT) (Peptide-binding protein 74) (PBP74)	3313	P38646	QAVTNPNNTFyATKR	R	L	2.53	0.36	2.96	108	118	P38646-118	1
JUL-1AB	HSPA9	Stress-70 protein, mitochondrial (75 kDa glucose-regulated protein) (GRP-75) (Heat shock 70 kDa protein 9) (Mortalin) (MOT) (Peptide-binding protein 74) (PBP74)	3313	P38646	ASNGDAWVEAHGKLySPSQIGAFVLMK	R	M	4.14	0.483	2.1	147	161	P38646-161	3
JUL-1AB	HSPA9	Stress-70 protein, mitochondrial (75 kDa glucose-regulated protein) (GRP-75) (Heat shock 70 kDa protein 9) (Mortalin) (MOT) (Peptide-binding protein 74) (PBP74)	3313	P38646	cELSSSVQTDINLPyLTMDSSGPK	K	H	4.85	0.541	2.36	317	331	P38646-331	5
JUL-1AB	HSPA9	Stress-70 protein, mitochondrial (75 kDa glucose-regulated protein) (GRP-75) (Heat shock 70 kDa protein 9) (Mortalin) (MOT) (Peptide-binding protein 74) (PBP74)	3313	P38646	LFEMAyKKMASER	K	E	3.24	0.45	0	647	652	P38646-652	2
JUL-1AB	MDH2	Malate dehydrogenase, mitochondrial (EC 1.1.1.37)	4191	P40926	HGVyNPNKIFGVTTLDIVR	K	A	3.66	0.544	0	158	161	P40926-161	1
JUL-1AB	MDH2	Malate dehydrogenase, mitochondrial (EC 1.1.1.37)	4191	P40926	AAVKGyLGPEQLPDcLK	K	G	3.4	0.413	0	75	80	P40926-80	1
JUL-1AB	HADHA	Trifunctional enzyme subunit alpha, mitochondrial (78 kDa gastrin-binding protein) (TP-alpha) [Includes: Long-chain enoyl-CoA hydratase (EC 4.2.1.17); Long chain 3-hydroxyacyl-CoA dehydrogenase (EC 1.1.1.211)]	3030	P40939	THINyGVKGDVAVVR	R	I	3.42	0.651	5.92	39	43	P40939-43	3
JUL-1AB	LRPPRC	Leucine-rich PPR motif-containing protein, mitochondrial (130 kDa leucine-rich protein) (LRP 130) (GP130)	10128	P42704	RDyLKEAVTTLK	R	T	3.5	0.597	0	1117	1119	P42704-1119	1
JUL-1AB	LRPPRC	Leucine-rich PPR motif-containing protein, mitochondrial (130 kDa leucine-rich protein) (LRP 130) (GP130)	10128	P42704	VIEPQyFGLAYLFR	K	K	3.35	0.609	2.64	1210	1215	P42704-1215	2
JUL-1AB	LRPPRC	Leucine-rich PPR motif-containing protein, mitochondrial (130 kDa leucine-rich protein) (LRP 130) (GP130)	10128	P42704	LIASycNVGDIEGASK	R	I	3.25	0.482	3.72	203	207	P42704-207	1
JUL-1AB	ATP5O	ATP synthase subunit O, mitochondrial (Oligomycin sensitivity conferral protein) (OSCP)	539	P48047	LVRPPVQVyGIEGR	K	Y	3.69	0.596	4.74	27	35	P48047-35	9
JUL-1AB	ATP5O	ATP synthase subunit O, mitochondrial (Oligomycin sensitivity conferral protein) (OSCP)	539	P48047	VAASVLNPyVKR	K	S	1.82	0.292	1.77	74	82	P48047-82	1
JUL-1AB	TUFM	Elongation factor Tu, mitochondrial (EF-Tu) (P43)	7284	P49411	LLDAVDTyIPVPAR	K	D	3.09	0.438	4.35	239	246	P49411-246	1
JUL-1AB	ACTB	Actin, cytoplasmic 1 (Beta-actin) [Cleaved into: Actin, cytoplasmic 1, N-terminally processed]	60	P60709	TTGIVmDSGDGVTHTVPIyEGYALPHAILR	R	L	1.93	0.0818	2.13	148	166	P60709-166	1
JUL-1AB	ACTB	Actin, cytoplasmic 1 (Beta-actin) [Cleaved into: Actin, cytoplasmic 1, N-terminally processed]	60	P60709	TTGIVMDSGDGVTHTVPIYEGyALPHAILR	R	L	4.91	0.62	8.54	148	169	P60709-169	14
JUL-1AB	ACTB	Actin, cytoplasmic 1 (Beta-actin) [Cleaved into: Actin, cytoplasmic 1, N-terminally processed]	60	P60709	ILTERGySFTTTAER	K	E	3.32	0.424	0	192	198	P60709-198	1
JUL-1AB	HSPE1	10 kDa heat shock protein, mitochondrial (Hsp10) (10 kDa chaperonin) (Chaperonin 10) (CPN10) (Early-pregnancy factor) (EPF)	3336	P61604	VLLPEyGGTKVVLDDKDYFLFR	K	D	2.48	0.5	0	71	76	P61604-76	1
JUL-1AB	HIST1H4A	Histone H4	8359	P62805	TVTAMDVVyALKR	K	Q	3.26	0.447	3.7	81	89	P62805-89	3
JUL-1AB	EIF5A	Eukaryotic translation initiation factor 5A-1 (eIF-5A-1) (eIF-5A1) (Eukaryotic initiation factor 5A isoform 1) (eIF-5A) (Rev-binding factor) (eIF-4D)	1984	P63241	RNDFQLIGIQDGyLSLLQDSGEVR	K	E	4.08	0.45	5.21	86	98	P63241-98	3
JUL-1AB	YBX1	Nuclease-sensitive element-binding protein 1 (CCAAT-binding transcription factor I subunit A) (CBF-A) (DNA-binding protein B) (DBPB) (Enhancer factor I subunit A) (EFI-A) (Y-box transcription factor) (Y-box-binding protein 1) (YB-1)	4904	P67809	RPQySNPPVQGEVMEGADNQGAGEQGRPVR	R	Q	3.11	0.354	2	205	208	P67809-208	1
JUL-1AB	TUBA1B	Tubulin alpha-1B chain (Alpha-tubulin ubiquitous) (Tubulin K-alpha-1) (Tubulin alpha-ubiquitous chain)	10376	P68363	VGINyQPPTVVPGGDLAK	K	V	2.99	0.352	2.77	353	357	P68363-357	1
JUL-1AB	SSBP1	Single-stranded DNA-binding protein, mitochondrial (Mt-SSB) (MtSSB) (PWP1-interacting protein 17)	6742	Q04837	IDyGEYMDKNNVR	K	R	2.27	0.553	0	114	116	Q04837-116	1
JUL-1AB	SSBP1	Single-stranded DNA-binding protein, mitochondrial (Mt-SSB) (MtSSB) (PWP1-interacting protein 17)	6742	Q04837	IDYGEyMDKNNVR	K	R	3.36	0.426	1.28	114	119	Q04837-119	1
JUL-1AB	SSBP1	Single-stranded DNA-binding protein, mitochondrial (Mt-SSB) (MtSSB) (PWP1-interacting protein 17)	6742	Q04837	SGDSEVyQLGDVSQK	R	T	4.95	0.524	6.43	67	73	Q04837-73	5
JUL-1AB	PMPCA	Mitochondrial-processing peptidase subunit alpha (EC 3.4.24.64) (Alpha-MPP) (P-55)	23203	Q10713	GMFSRLyLNVLNR	K	H	2.38	0.389	0.824	358	364	Q10713-364	1
JUL-1AB	PMPCA	Mitochondrial-processing peptidase subunit alpha (EC 3.4.24.64) (Alpha-MPP) (P-55)	23203	Q10713	HHWMyNATSYHHSYEDTGLLcIHASADPR	R	Q	3.62	0.453	1.46	371	375	Q10713-375	1
JUL-1AB	PMPCA	Mitochondrial-processing peptidase subunit alpha (EC 3.4.24.64) (Alpha-MPP) (P-55)	23203	Q10713	HHWMYNATSyHHSYEDTGLLcIHASADPR	R	Q	1.35	0.228	1.08	371	380	Q10713-380	1
JUL-1AB	PMPCA	Mitochondrial-processing peptidase subunit alpha (EC 3.4.24.64) (Alpha-MPP) (P-55)	23203	Q10713	HHWMYNATSYHHSyEDTGLLcIHASADPR	R	Q	2.52	0.53	0	371	384	Q10713-384	1
JUL-1AB	GRSF1	G-rich sequence factor 1 (GRSF-1)	2926	Q12849	HREEIGNRyIEIFPSR	K	R	3.01	0.496	0	310	318	Q12849-318	1
JUL-1AB	GRSF1	G-rich sequence factor 1 (GRSF-1)	2926	Q12849	SHVHHRyIELFLNScPK	R	G	3.76	0.377	1.24	462	468	Q12849-468	3
JUL-1AB	TRAP1	Heat shock protein 75 kDa, mitochondrial (HSP 75) (TNFR-associated protein 1) (Tumor necrosis factor type 1 receptor-associated protein) (TRAP-1)	10131	Q12931	EWQHEEFYRyVAQAHDKPR	R	Y	3.03	0.512	5.62	308	317	Q12931-317	2
JUL-1AB	ECH1	Delta(3,5)-Delta(2,4)-dienoyl-CoA isomerase, mitochondrial (EC 5.3.3.-)	1891	Q13011	DIITRyQETFNVIER	R	C	3.06	0.492	0	144	149	Q13011-149	1
JUL-1AB	HADH	Hydroxyacyl-coenzyme A dehydrogenase, mitochondrial (HCDH) (EC 1.1.1.35) (Medium and short-chain L-3-hydroxyacyl-coenzyme A dehydrogenase) (Short-chain 3-hydroxyacyl-CoA dehydrogenase)	3033	Q16836	LLVPyLMEAIR	R	L	2.33	0.553	0	222	226	Q16836-226	1
JUL-1AB	HADH	Hydroxyacyl-coenzyme A dehydrogenase, mitochondrial (HCDH) (EC 1.1.1.35) (Medium and short-chain L-3-hydroxyacyl-coenzyme A dehydrogenase) (Short-chain 3-hydroxyacyl-CoA dehydrogenase)	3033	Q16836	LGAGyPmGPFELLDYVGLDTTK	K	F	2.59	0.17	1.37	250	254	Q16836-254	2
JUL-1AB	CYP51A1	Lanosterol 14-alpha demethylase (LDM) (EC 1.14.13.70) (CYPLI) (Cytochrome P450 51A1) (Cytochrome P450-14DM) (Cytochrome P45014DM) (Cytochrome P450LI) (Sterol 14-alpha demethylase)	1595	Q16850	NEDLNAEDVySRLTTPVFGK	K	G	3.34	0.407	0	122	131	Q16850-131	1
JUL-1AB	CYP51A1	Lanosterol 14-alpha demethylase (LDM) (EC 1.14.13.70) (CYPLI) (Cytochrome P450 51A1) (Cytochrome P450-14DM) (Cytochrome P45014DM) (Cytochrome P450LI) (Sterol 14-alpha demethylase)	1595	Q16850	GVAyDVPNPVFLEQK	K	K	0	0	4.4	142	145	Q16850-145	1
JUL-1AB	IMMT	MICOS complex subunit MIC60 (Cell proliferation-inducing gene 4/52 protein) (Mitochondrial inner membrane protein) (Mitofilin) (p87/89)	10989	Q16891	ySTSGSSGLTTGK	R	I	2.78	0.639	0	33	33	Q16891-33	2
JUL-1AB	GLRX5	Glutaredoxin-related protein 5, mitochondrial (Monothiol glutaredoxin-5)	51218	Q86SX6	LHGVRDyAAYNVLDDPELR	R	Q	3.37	0.509	2.52	79	85	Q86SX6-85	4
JUL-1AB	GLRX5	Glutaredoxin-related protein 5, mitochondrial (Monothiol glutaredoxin-5)	51218	Q86SX6	LHGVRDYAAyNVLDDPELR	R	Q	2.76	0.22	2.04	79	88	Q86SX6-88	1
JUL-1AB	GADD45GIP1	Growth arrest and DNA damage-inducible proteins-interacting protein 1 (39S ribosomal protein L59, mitochondrial) (MRP-L59) (CKII beta-associating protein) (CR6-interacting factor 1) (CRIF1) (Papillomavirus L2-interacting nuclear protein 1) (PLINP) (PLINP-1) (p53-responsive gene 6 protein)	90480	Q8TAE8	LQAEAQELLGyQVDPR	R	S	3.19	0.43	0	156	166	Q8TAE8-166	1
JUL-1AB	GADD45GIP1	Growth arrest and DNA damage-inducible proteins-interacting protein 1 (39S ribosomal protein L59, mitochondrial) (MRP-L59) (CKII beta-associating protein) (CR6-interacting factor 1) (CRIF1) (Papillomavirus L2-interacting nuclear protein 1) (PLINP) (PLINP-1) (p53-responsive gene 6 protein)	90480	Q8TAE8	ELEAEEREWyPSLATMQESLR	R	V	3.89	0.451	1.6	84	93	Q8TAE8-93	2
JUL-1AB	CCDC51	Coiled-coil domain-containing protein 51	79714	Q96ER9	VSREDSQyLELATLEHR	R	M	4.11	0.398	0	140	147	Q96ER9-147	1
JUL-1AB	USMG5	Up-regulated during skeletal muscle growth protein 5 (Diabetes-associated protein in insulin-sensitive tissues) (HCV F-transactivated protein 2)	84833	Q96IX5	AGPESDAQyQFTGIK	M	K	0	0	2.08	2	10	Q96IX5-10	1
JUL-1AB	NIPSNAP1	Protein NipSnap homolog 1 (NipSnap1)	8508	Q9BPW8	GWDENVYyTVPLVR	R	H	4.34	0.455	2.36	255	262	Q9BPW8-262	2
JUL-1AB	GRPEL1	GrpE protein homolog 1, mitochondrial (HMGE) (Mt-GrpE#1)	80273	Q9HAV7	LVEEAKLyGIQAFcK	K	D	2.66	0.112	1.12	95	102	Q9HAV7-102	2
JUL-1AB	GRPEL1	GrpE protein homolog 1, mitochondrial (HMGE) (Mt-GrpE#1)	80273	Q9HAV7	FDPyEHEALFHTPVEGK	K	E	4.38	0.473	1.82	170	173	Q9HAV7-173	10
JUL-1AB	MCCC2	Methylcrotonoyl-CoA carboxylase beta chain, mitochondrial (MCCase subunit beta) (EC 6.4.1.4) (3-methylcrotonyl-CoA carboxylase 2) (3-methylcrotonyl-CoA carboxylase non-biotin-containing subunit) (3-methylcrotonyl-CoA:carbon dioxide ligase subunit beta)	64087	Q9HCC0	IFGyPVGIVGNNGVLFSESAK	R	K	2.84	0.471	3.89	362	365	Q9HCC0-365	2
JUL-1AB	MCCC2	Methylcrotonoyl-CoA carboxylase beta chain, mitochondrial (MCCase subunit beta) (EC 6.4.1.4) (3-methylcrotonyl-CoA carboxylase 2) (3-methylcrotonyl-CoA carboxylase non-biotin-containing subunit) (3-methylcrotonyl-CoA:carbon dioxide ligase subunit beta)	64087	Q9HCC0	NIPLLFLQNITGFMVGREyEAEGIAK	R	D	2.76	0.631	3.6	395	413	Q9HCC0-413	3
JUL-1AB	ABHD10	Mycophenolic acid acyl-glucuronide esterase, mitochondrial (EC 3.1.1.93) (Alpha/beta hydrolase domain-containing protein 10) (Abhydrolase domain-containing protein 10)	55347	Q9NUJ1	YSEEGVyNVQYSFIK	K	E	3.97	0.633	7.6	209	215	Q9NUJ1-215	1
JUL-1AB	ABHD10	Mycophenolic acid acyl-glucuronide esterase, mitochondrial (EC 3.1.1.93) (Alpha/beta hydrolase domain-containing protein 10) (Abhydrolase domain-containing protein 10)	55347	Q9NUJ1	SPGIIFIPGYLSyMNGTK	K	A	3.12	0.534	4.34	75	87	Q9NUJ1-87	1
JUL-1AB	STOML2	Stomatin-like protein 2, mitochondrial (SLP-2) (EPB72-like protein 2) (Paraprotein target 7) (Paratarg-7)	30968	Q9UJZ1	IMDPyKASYGVEDPEYAVTQLAQTTMR	R	S	3.79	0.403	4.02	109	113	Q9UJZ1-113	2
JUL-1AB	STOML2	Stomatin-like protein 2, mitochondrial (SLP-2) (EPB72-like protein 2) (Paraprotein target 7) (Paratarg-7)	30968	Q9UJZ1	ASYGVEDPEyAVTQLAQTTMR	K	S	4.48	0.422	1.26	115	124	Q9UJZ1-124	2

## Sheet: L1
Replicate	Gene Name	Gene Description	Entrez ID	UNIPROT ID	Peptide sequence	Previous amino acid	Next amino acid	SEQUEST XCorr score	SEQUEST DCn score	X! Tandem -log(e) score	Peptide START	Labeling site	UNIPROT-site	Unique Spectrum Count
APR-2AB	PDCD5	Programmed cell death protein 5 (TF-1 cell apoptosis-related protein 19) (Protein TFAR19)	9141	O14737	VMDSDEDDDy	K	-	2.84	0.641	0.42	116	125	O14737-125	2
APR-2AB	PDCD5	Programmed cell death protein 5 (TF-1 cell apoptosis-related protein 19) (Protein TFAR19)	9141	O14737	AVENyLIQMAR	K	Y	2.61	0.365	0.886	69	73	O14737-73	1
APR-2AB	HTRA2	Serine protease HTRA2, mitochondrial (EC 3.4.21.108) (High temperature requirement protein A2) (HtrA2) (Omi stress-regulated endoprotease) (Serine protease 25) (Serine proteinase OMI)	27429	O43464	SQyNFIADVVEK	R	T	3.39	0.498	1.35	145	147	O43464-147	3
APR-2AB	HTRA2	Serine protease HTRA2, mitochondrial (EC 3.4.21.108) (High temperature requirement protein A2) (HtrA2) (Omi stress-regulated endoprotease) (Serine protease 25) (Serine proteinase OMI)	27429	O43464	LLSGDTyEAVVTAVDPVADIATLR	R	I	2.33	0.363	1.64	210	216	O43464-216	1
APR-2AB	SCO2	Protein SCO2 homolog, mitochondrial	9997	O43819	yVQDFHPR	R	L	2.6	0.396	0	180	180	O43819-180	3
APR-2AB	OPA1	Dynamin-like 120 kDa protein, mitochondrial (EC 3.6.5.5) (Optic atrophy protein 1) [Cleaved into: Dynamin-like 120 kDa protein, form S1]	4976	O60313-2	AAGQYSTSyAQQK	R	R	2.82	0.371	3.74	231	239	O60313-2-239	2
APR-2AB	OPA1	Dynamin-like 120 kDa protein, mitochondrial (EC 3.6.5.5) (Optic atrophy protein 1) [Cleaved into: Dynamin-like 120 kDa protein, form S1]	4976	O60313	cNEEHPAyLASDEITTVR	K	K	2.78	0.334	1.11	801	808	O60313-808	1
APR-2AB	TIMM17B	Mitochondrial import inner membrane translocase subunit Tim17-B	10245	O60830	DGTPAPGYPSyQQYH	K	-	0.981	0.0141	4.57	158	168	O60830-168	1
APR-2AB	TIMM17B	Mitochondrial import inner membrane translocase subunit Tim17-B	10245	O60830	DGTPAPGYPSYQQyH	K	-	2.33	0.49	0.824	158	171	O60830-171	1
APR-2AB	FLNB	Filamin-B (FLN-B) (ABP-278) (ABP-280 homolog) (Actin-binding-like protein) (Beta-filamin) (Filamin homolog 1) (Fh1) (Filamin-3) (Thyroid autoantigen) (Truncated actin-binding protein) (Truncated ABP)	2317	O75369	VTASGPGLSSyGVPASLPVDFAIDAR	K	D	2.47	0.363	0.921	1520	1530	O75369-1530	1
APR-2AB	AIFM1	Apoptosis-inducing factor 1, mitochondrial (EC 1.1.1.-) (Programmed cell death protein 8)	9131	O95831	SIyFQPPSFYVSAQDLPHIENGGVAVLTGK	R	K	3.11	0.535	1.96	202	204	O95831-204	1
APR-2AB	AIFM1	Apoptosis-inducing factor 1, mitochondrial (EC 1.1.1.-) (Programmed cell death protein 8)	9131	O95831	ILPEyLSNWTMEK	K	V	3.27	0.513	1.38	343	347	O95831-347	1
APR-2AB	AIFM1	Apoptosis-inducing factor 1, mitochondrial (EC 1.1.1.-) (Programmed cell death protein 8)	9131	O95831	SNIWVAGDAAcFyDIK	R	L	4.17	0.649	5.64	431	443	O95831-443	2
APR-2AB	NDUFB10	NADH dehydrogenase [ubiquinone] 1 beta subcomplex subunit 10 (Complex I-PDSW) (CI-PDSW) (NADH-ubiquinone oxidoreductase PDSW subunit)	4716	O96000	YQDLGAySSAR	R	K	2.9	0.562	3.51	137	143	O96000-143	4
APR-2AB	NDUFB10	NADH dehydrogenase [ubiquinone] 1 beta subcomplex subunit 10 (Complex I-PDSW) (CI-PDSW) (NADH-ubiquinone oxidoreductase PDSW subunit)	4716	O96000	RDyKVDQEIINIMQDR	K	L	3.27	0.486	2.01	88	90	O96000-90	3
APR-2AB	ALDOA	Fructose-bisphosphate aldolase A (EC 4.1.2.13) (Lung cancer antigen NY-LU-1) (Muscle-type aldolase)	226	P04075	YTPSGQAGAAASESLFVSNHAy	K	-	4.41	0.716	8.47	343	364	P04075-364	8
APR-2AB	PFN1	Profilin-1 (Epididymis tissue protein Li 184a) (Profilin I)	5216	P07737	SSFyVNGLTLGGQK	R	C	3.46	0.504	4.68	57	60	P07737-60	3
APR-2AB	HSP90AA1	Heat shock protein HSP 90-alpha (Heat shock 86 kDa) (HSP 86) (HSP86) (Lipopolysaccharide-associated protein 2) (LAP-2) (LPS-associated protein 2) (Renal carcinoma antigen NY-REN-38)	3320	P07900	LVTSPccIVTSTyGWTANMER	R	I	3.09	0.605	5.42	592	604	P07900-604	2
APR-2AB	CYC1	Cytochrome c1, heme protein, mitochondrial (Complex III subunit 4) (Complex III subunit IV) (Cytochrome b-c1 complex subunit 4) (Ubiquinol-cytochrome-c reductase complex cytochrome c1 subunit) (Cytochrome c-1)	1537	P08574	LFDyFPKPYPNSEAAR	K	A	2.42	0.416	1.07	171	174	P08574-174	2
APR-2AB	HNRNPA1	Heterogeneous nuclear ribonucleoprotein A1 (hnRNP A1) (Helix-destabilizing protein) (Single-strand RNA-binding protein) (hnRNP core protein A1) [Cleaved into: Heterogeneous nuclear ribonucleoprotein A1, N-terminally processed]	3178	P09651	NQGGYGGSSSSSSyGSGR	R	R	3.77	0.603	6.21	353	366	P09651-366	3
APR-2AB	HSPA1A	Heat shock 70 kDa protein 1A (Heat shock 70 kDa protein 1) (HSP70-1) (HSP70.1)	3303	P0DMV8	SINPDEAVAyGAAVQAAILMGDK	K	S	2.19	0.336	1.08	362	371	P0DMV8-371	1
APR-2AB	HSPA1A	Heat shock 70 kDa protein 1A (Heat shock 70 kDa protein 1) (HSP70-1) (HSP70.1)	3303	P0DMV8	ELEQVcNPIISGLyQGAGGPGPGGFGAQGPK	K	G	5.02	0.584	6.89	598	611	P0DMV8-611	3
APR-2AB	CKMT1A	Creatine kinase U-type, mitochondrial (EC 2.7.3.2) (Acidic-type mitochondrial creatine kinase) (Mia-CK) (Ubiquitous mitochondrial creatine kinase) (U-MtCK)	1159	P12532	LGyILTcPSNLGTGLR	R	A	4.65	0.607	2.96	310	312	P12532-312	4
APR-2AB	COX4I1	Cytochrome c oxidase subunit 4 isoform 1, mitochondrial (Cytochrome c oxidase polypeptide IV) (Cytochrome c oxidase subunit IV isoform 1) (COX IV-1)	1327	P13073	HYVyGPLPQSFDKEWVAK	K	Q	3.04	0.509	0.959	123	126	P13073-126	1
APR-2AB	COX6B1	Cytochrome c oxidase subunit 6B1 (Cytochrome c oxidase subunit VIb isoform 1) (COX VIb-1)	1340	P14854	GGDISVcEWyQR	K	V	2.7	0.435	5	48	57	P14854-57	2
APR-2AB	VDAC1	Voltage-dependent anion-selective channel protein 1 (VDAC-1) (hVDAC1) (Outer mitochondrial membrane protein porin 1) (Plasmalemmal porin) (Porin 31HL) (Porin 31HM)	7416	P21796	WTEyGLTFTEK	R	W	3.69	0.659	2.89	64	67	P21796-67	9
APR-2AB	HNRNPA2B1	Heterogeneous nuclear ribonucleoproteins A2/B1 (hnRNP A2/B1)	3181	P22626	NMGGPYGGGNyGPGGSGGSGGYGGR	R	S	2.1	0.434	3.26	326	336	P22626-336	1
APR-2AB	HNRNPA2B1	Heterogeneous nuclear ribonucleoproteins A2/B1 (hnRNP A2/B1)	3181	P22626	NMGGPYGGGNYGPGGSGGSGGyGGR	R	S	2.35	0.478	0	326	347	P22626-347	1
APR-2AB	EEF1D	Elongation factor 1-delta (EF-1-delta) (Antigen NY-CO-4)	1936	P29692	LVPVGyGIRK	K	L	2.05	0.409	0.959	233	238	P29692-238	2
APR-2AB	PHB	Prohibitin	5245	P35232	KLEAAEDIAyQLSR	R	S	5.17	0.594	2.77	240	249	P35232-249	4
APR-2AB	PHB	Prohibitin	5245	P35232	NITyLPAGQSVLLQLPQ	R	-	2.21	0.441	0.854	256	259	P35232-259	1
APR-2AB	TAGLN2	Transgelin-2 (Epididymis tissue protein Li 7e) (SM22-alpha homolog)	8407	P37802	GASQAGMTGyGmPR	R	Q	3.2	0.67	3.33	183	192	P37802-192	11
APR-2AB	TAGLN2	Transgelin-2 (Epididymis tissue protein Li 7e) (SM22-alpha homolog)	8407	P37802	GPAyGLSR	R	E	2.33	0.225	2.23	5	8	P37802-8	3
APR-2AB	GPD2	Glycerol-3-phosphate dehydrogenase, mitochondrial (GPD-M) (GPDH-M) (EC 1.1.5.3) (mtGPD)	2820	P43304	LVGAIVyYDGQHNDAR	K	M	3.42	0.62	0	212	218	P43304-218	1
APR-2AB	VDAC2	Voltage-dependent anion-selective channel protein 2 (VDAC-2) (hVDAC2) (Outer mitochondrial membrane protein porin 2)	7417	P45880	NNFAVGyR	R	T	2.39	0.365	1.55	178	184	P45880-184	1
APR-2AB	VDAC2	Voltage-dependent anion-selective channel protein 2 (VDAC-2) (hVDAC2) (Outer mitochondrial membrane protein porin 2)	7417	P45880	WcEyGLTFTEK	K	W	2.77	0.339	1.09	75	78	P45880-78	2
APR-2AB	NDUFA8	NADH dehydrogenase [ubiquinone] 1 alpha subcomplex subunit 8 (Complex I-19kD) (CI-19kD) (Complex I-PGIV) (CI-PGIV) (NADH-ubiquinone oxidoreductase 19 kDa subunit)	4702	P51970	HcAEPFTEYWTcIDyTGQQLFR	R	H	4.29	0.704	7.02	77	91	P51970-91	4
APR-2AB	HCCS	Cytochrome c-type heme lyase (CCHL) (EC 4.4.1.17) (Holocytochrome c-type synthase)	3052	P53701	KTySVPAHQER	K	A	2.62	0.366	0	49	51	P53701-51	1
APR-2AB	HCCS	Cytochrome c-type heme lyase (CCHL) (EC 4.4.1.17) (Holocytochrome c-type synthase)	3052	P53701	AyEYVEcPIR	R	G	3.15	0.576	3.41	60	61	P53701-61	3
APR-2AB	HCCS	Cytochrome c-type heme lyase (CCHL) (EC 4.4.1.17) (Holocytochrome c-type synthase)	3052	P53701	AYEyVEcPIR	R	G	2.36	0.47	1.85	60	63	P53701-63	1
APR-2AB	ROMO1	Reactive oxygen species modulator 1 (ROS modulator 1) (Epididymis tissue protein Li 175) (Glyrichin) (Mitochondrial targeting GxxxG motif protein) (MTGM) (Protein MGR2 homolog)	140823	P60602	pVAVGPyGQSQPScFDR	M	V	0	0	4.04	2	8	P60602-8	2
APR-2AB	ACTB	Actin, cytoplasmic 1 (Beta-actin) [Cleaved into: Actin, cytoplasmic 1, N-terminally processed]	60	P60709	TTGIVMDSGDGVTHTVPIyEGYALPHAILR	R	L	3.99	0.653	1.36	148	166	P60709-166	7
APR-2AB	ACTB	Actin, cytoplasmic 1 (Beta-actin) [Cleaved into: Actin, cytoplasmic 1, N-terminally processed]	60	P60709	TTGIVMDSGDGVTHTVPIYEGyALPHAILR	R	L	4.6	0.559	11.3	148	169	P60709-169	10
APR-2AB	ACTB	Actin, cytoplasmic 1 (Beta-actin) [Cleaved into: Actin, cytoplasmic 1, N-terminally processed]	60	P60709	ILTERGySFTTTAER	K	E	3.15	0.526	1.1	192	198	P60709-198	4
APR-2AB	ACTB	Actin, cytoplasmic 1 (Beta-actin) [Cleaved into: Actin, cytoplasmic 1, N-terminally processed]	60	P60709	IWHHTFyNELR	K	V	2.75	0.398	0	85	91	P60709-91	1
APR-2AB	RPS3A	40S ribosomal protein S3a (v-fos transformation effector protein) (Fte-1)	6189	P61247	VERADGyEPPVQESV	K	-	2.78	0.51	0	250	256	P61247-256	1
APR-2AB	HSPE1	10 kDa heat shock protein, mitochondrial (Hsp10) (10 kDa chaperonin) (Chaperonin 10) (CPN10) (Early-pregnancy factor) (EPF)	3336	P61604	VLLPEyGGTK	K	V	1.93	0.435	0	71	76	P61604-76	1
APR-2AB	HIST1H4A	Histone H4	8359	P62805	TVTAMDVVyALK	K	R	3.15	0.51	1.6	81	89	P62805-89	1
APR-2AB	EIF5A	Eukaryotic translation initiation factor 5A-1 (eIF-5A-1) (eIF-5A1) (Eukaryotic initiation factor 5A isoform 1) (eIF-5A) (Rev-binding factor) (eIF-4D)	1984	P63241	RNDFQLIGIQDGyLSLLQDSGEVR	K	E	3.43	0.558	2.15	86	98	P63241-98	2
APR-2AB	YBX1	Nuclease-sensitive element-binding protein 1 (CCAAT-binding transcription factor I subunit A) (CBF-A) (DNA-binding protein B) (DBPB) (Enhancer factor I subunit A) (EFI-A) (Y-box transcription factor) (Y-box-binding protein 1) (YB-1)	4904	P67809	NyQQNYQNSESGEKNEGSESAPEGQAQQR	R	R	3.1	0.528	1.13	157	158	P67809-158	1
APR-2AB	YBX1	Nuclease-sensitive element-binding protein 1 (CCAAT-binding transcription factor I subunit A) (CBF-A) (DNA-binding protein B) (DBPB) (Enhancer factor I subunit A) (EFI-A) (Y-box transcription factor) (Y-box-binding protein 1) (YB-1)	4904	P67809	NYQQNyQNSESGEKNEGSESAPEGQAQQR	R	R	3.71	0.567	2.42	157	162	P67809-162	2
APR-2AB	YBX1	Nuclease-sensitive element-binding protein 1 (CCAAT-binding transcription factor I subunit A) (CBF-A) (DNA-binding protein B) (DBPB) (Enhancer factor I subunit A) (EFI-A) (Y-box transcription factor) (Y-box-binding protein 1) (YB-1)	4904	P67809	RPQySNPPVQGEVMEGADNQGAGEQGRPVR	R	Q	3.32	0.452	0	205	208	P67809-208	1
APR-2AB	EEF1A1	Elongation factor 1-alpha 1 (EF-1-alpha-1) (Elongation factor Tu) (EF-Tu) (Eukaryotic elongation factor 1 A-1) (eEF1A-1) (Leukocyte receptor cluster member 7)	1915	P68104	EHALLAyTLGVK	R	Q	2.58	0.499	0	135	141	P68104-141	2
APR-2AB	CYCS	Cytochrome c	54205	P99999	TGQAPGYSyTAANK	K	N	2.32	0.558	3.17	41	49	P99999-49	1
APR-2AB	CYP51A1	Lanosterol 14-alpha demethylase (LDM) (EC 1.14.13.70) (CYPLI) (Cytochrome P450 51A1) (Cytochrome P450-14DM) (Cytochrome P45014DM) (Cytochrome P450LI) (Sterol 14-alpha demethylase)	1595	Q16850	TFTyLLGSDAAALLFNSK	K	N	3.75	0.59	4.41	104	107	Q16850-107	3
APR-2AB	CYP51A1	Lanosterol 14-alpha demethylase (LDM) (EC 1.14.13.70) (CYPLI) (Cytochrome P450 51A1) (Cytochrome P450-14DM) (Cytochrome P45014DM) (Cytochrome P450LI) (Sterol 14-alpha demethylase)	1595	Q16850	NEDLNAEDVySRLTTPVFGK	K	G	3.21	0.55	3.85	122	131	Q16850-131	4
APR-2AB	CYP51A1	Lanosterol 14-alpha demethylase (LDM) (EC 1.14.13.70) (CYPLI) (Cytochrome P450 51A1) (Cytochrome P450-14DM) (Cytochrome P45014DM) (Cytochrome P450LI) (Sterol 14-alpha demethylase)	1595	Q16850	GVAyDVPNPVFLEQK	K	K	3.84	0.429	2.89	142	145	Q16850-145	2
APR-2AB	IMMT	MICOS complex subunit MIC60 (Cell proliferation-inducing gene 4/52 protein) (Mitochondrial inner membrane protein) (Mitofilin) (p87/89)	10989	Q16891	VVSQyHELVVQAR	K	D	3.27	0.376	1.64	354	358	Q16891-358	6
APR-2AB	IMMT	MICOS complex subunit MIC60 (Cell proliferation-inducing gene 4/52 protein) (Mitochondrial inner membrane protein) (Mitofilin) (p87/89)	10989	Q16891	LFEMVLGPAAyNVPLPK	K	K	3.94	0.708	6.16	85	95	Q16891-95	7
APR-2AB	TIMM50	Mitochondrial import inner membrane translocase subunit TIM50	92609	Q3ZCQ8	TVLEHyALEDDPLAAFK	R	Q	3.51	0.606	3.96	296	301	Q3ZCQ8-301	2
APR-2AB	CCSMST1	Protein CCSMST1	283951	Q4G0I0	QVWGEVPEPSDRSEEPETPAAyR	R	A	3.1	0.457	2.62	107	128	Q4G0I0-128	6
APR-2AB	AGK	Acylglycerol kinase, mitochondrial (hAGK) (EC 2.7.1.107) (EC 2.7.1.94) (Multiple substrate lipid kinase) (HsMuLK) (MuLK) (Multi-substrate lipid kinase)	55750	Q53H12	NAAPILHLSGMDVTIVKTDyEGQAK	K	K	3.13	0.37	0	83	102	Q53H12-102	1
APR-2AB	AGK	Acylglycerol kinase, mitochondrial (hAGK) (EC 2.7.1.107) (EC 2.7.1.94) (Multiple substrate lipid kinase) (HsMuLK) (MuLK) (Multi-substrate lipid kinase)	55750	Q53H12	LASyWAQPQDALSQEVSPEVWK	R	D	3.8	0.482	1.24	283	286	Q53H12-286	2
APR-2AB	TTC19	Tetratricopeptide repeat protein 19, mitochondrial (TPR repeat protein 19)	54902	Q6DKK2	ATMSyLLGGGMK	K	Q	2.52	0.51	4.29	161	165	Q6DKK2-165	1
APR-2AB	TTC19	Tetratricopeptide repeat protein 19, mitochondrial (TPR repeat protein 19)	54902	Q6DKK2	LASIyAAQNR	K	Q	3.22	0.398	0	185	189	Q6DKK2-189	3
APR-2AB	TTC19	Tetratricopeptide repeat protein 19, mitochondrial (TPR repeat protein 19)	54902	Q6DKK2	FDEAYIyMQR	R	A	2.69	0.444	2.24	295	301	Q6DKK2-301	1
APR-2AB	SND1	Staphylococcal nuclease domain-containing protein 1 (100 kDa coactivator) (EBNA2 coactivator p100) (Tudor domain-containing protein 11) (p100 co-activator)	27044	Q7KZF4	ADDADEFGySR	R	-	2.68	0.55	0	900	908	Q7KZF4-908	2
APR-2AB	UPF1	Regulator of nonsense transcripts 1 (EC 3.6.4.-) (ATP-dependent helicase RENT1) (Nonsense mRNA reducing factor 1) (NORF1) (Up-frameshift suppressor 1 homolog) (hUpf1)	5976	Q92900	AYQHGGVTGLSQy	R	-	2.71	0.336	1.92	1117	1129	Q92900-1129	1
APR-2AB	PPP1R14B	Protein phosphatase 1 regulatory subunit 14B (Phospholipase C-beta-3 neighbouring gene protein)	26472	Q96C90	VyFQSPPGAAGEGPGGADDEGPVRR	R	Q	2.54	0.349	1.21	28	29	Q96C90-29	1
APR-2AB	TBCB	Tubulin-folding cofactor B (Cytoskeleton-associated protein 1) (Cytoskeleton-associated protein CKAPI) (Tubulin-specific chaperone B)	1155	Q99426	LGEyEDVSR	R	V	2.48	0.413	0	95	98	Q99426-98	1
APR-2AB	PHB2	Prohibitin-2 (B-cell receptor-associated protein BAP37) (D-prohibitin) (Repressor of estrogen receptor activity)	11331	Q99623	VLSRPNAQELPSMyQR	R	L	3.66	0.45	0	108	121	Q99623-121	2
APR-2AB	PHB2	Prohibitin-2 (B-cell receptor-associated protein BAP37) (D-prohibitin) (Repressor of estrogen receptor activity)	11331	Q99623	LLLGAGAVAyGVR	K	E	3.06	0.538	3.07	25	34	Q99623-34	2
APR-2AB	PHB2	Prohibitin-2 (B-cell receptor-associated protein BAP37) (D-prohibitin) (Repressor of estrogen receptor activity)	11331	Q99623	IPWFQyPIIYDIR	R	A	2.6	0.498	0	72	77	Q99623-77	1
APR-2AB	CLPB	Caseinolytic peptidase B protein homolog (EC 3.6.1.3) (Suppressor of potassium transport defect 3)	81570	Q9H078	FIGSPPGyVGHEEGGQLTK	K	K	2.99	0.507	6.16	423	430	Q9H078-430	1
APR-2AB	CLPB	Caseinolytic peptidase B protein homolog (EC 3.6.1.3) (Suppressor of potassium transport defect 3)	81570	Q9H078	INEIVyFLPFcHSELIQLVNK	R	E	2.99	0.331	0	562	567	Q9H078-567	1
APR-2AB	GHITM	Growth hormone-inducible transmembrane protein (Dermal papilla-derived protein 2) (Mitochondrial morphology and cristae structure 1) (MICS1) (Transmembrane BAX inhibitor motif-containing protein 5)	27069	Q9H3K2	RAEVSPMyGVQK	K	Y	2.97	0.408	1.48	301	308	Q9H3K2-308	5
APR-2AB	PTGES2	Prostaglandin E synthase 2 (Membrane-associated prostaglandin E synthase-2) (mPGE synthase-2) (Microsomal prostaglandin E synthase 2) (mPGES-2) (Prostaglandin-H(2) E-isomerase) (EC 5.3.99.3) [Cleaved into: Prostaglandin E synthase 2 truncated form]	80142	Q9H7Z7	TYLVSGQPLEEIITyYPAMK	K	A	2.9	0.582	1.43	174	188	Q9H7Z7-188	4
APR-2AB	PTGES2	Prostaglandin E synthase 2 (Membrane-associated prostaglandin E synthase-2) (mPGE synthase-2) (Microsomal prostaglandin E synthase 2) (mPGES-2) (Prostaglandin-H(2) E-isomerase) (EC 5.3.99.3) [Cleaved into: Prostaglandin E synthase 2 truncated form]	80142	Q9H7Z7	TYLVSGQPLEEIITYyPAMK	K	A	3.58	0.452	0.62	174	189	Q9H7Z7-189	6
APR-2AB	PTGES2	Prostaglandin E synthase 2 (Membrane-associated prostaglandin E synthase-2) (mPGE synthase-2) (Microsomal prostaglandin E synthase 2) (mPGES-2) (Prostaglandin-H(2) E-isomerase) (EC 5.3.99.3) [Cleaved into: Prostaglandin E synthase 2 truncated form]	80142	Q9H7Z7	TPTEALASFDyIVR	R	E	2.96	0.493	2	253	263	Q9H7Z7-263	1
APR-2AB	STARD7	StAR-related lipid transfer protein 7, mitochondrial (Gestational trophoblastic tumor protein 1) (START domain-containing protein 7) (StARD7)	56910	Q9NQZ5	VFGTyTDVTPR	R	Q	2.47	0.461	1.17	167	171	Q9NQZ5-171	1
APR-2AB	DIABLO	Diablo homolog, mitochondrial (Direct IAP-binding protein with low pI) (Second mitochondria-derived activator of caspase) (Smac)	56616	Q9NR28	AVyTLTSLYR	K	Q	2.87	0.421	2.17	106	108	Q9NR28-108	4
APR-2AB	DIABLO	Diablo homolog, mitochondrial (Direct IAP-binding protein with low pI) (Second mitochondria-derived activator of caspase) (Smac)	56616	Q9NR28	AVYTLTSLyR	K	Q	2.33	0.359	5.33	106	114	Q9NR28-114	2
APR-2AB	DIABLO	Diablo homolog, mitochondrial (Direct IAP-binding protein with low pI) (Second mitochondria-derived activator of caspase) (Smac)	56616	Q9NR28	LETTWMTAVGLSEMAAEAAyQTGADQASITAR	K	N	4.01	0.484	5.92	153	172	Q9NR28-172	3
APR-2AB	DIABLO	Diablo homolog, mitochondrial (Direct IAP-binding protein with low pI) (Second mitochondria-derived activator of caspase) (Smac)	56616	Q9NR28	AESEQEAyLRED	R	-	2.98	0.473	2.36	228	235	Q9NR28-235	11
APR-2AB	OCIAD1	OCIA domain-containing protein 1 (Ovarian carcinoma immunoreactive antigen)	54940	Q9NX40	NITyEELR	K	N	2.4	0.413	0	196	199	Q9NX40-199	2
APR-2AB	OCIAD1	OCIA domain-containing protein 1 (Ovarian carcinoma immunoreactive antigen)	54940	Q9NX40	NRESyEVSLTQK	K	T	2.91	0.372	0	206	210	Q9NX40-210	5
APR-2AB	OCIAD1	OCIA domain-containing protein 1 (Ovarian carcinoma immunoreactive antigen)	54940	Q9NX40	VNKyGDTWDE	K	-	1.98	0.42	0	236	239	Q9NX40-239	2
APR-2AB	CHCHD3	MICOS complex subunit MIC19 (Coiled-coil-helix-coiled-coil-helix domain-containing protein 3)	54927	Q9NX63	SSEFyRVTTEQYQK	R	A	3.38	0.413	5.85	152	156	Q9NX63-156	3
APR-2AB	CHCHD3	MICOS complex subunit MIC19 (Coiled-coil-helix-coiled-coil-helix domain-containing protein 3)	54927	Q9NX63	VTTEQyQKAAEEVEAK	R	F	3.08	0.363	0	158	163	Q9NX63-163	2
APR-2AB	CHCHD3	MICOS complex subunit MIC19 (Coiled-coil-helix-coiled-coil-helix domain-containing protein 3)	54927	Q9NX63	FKRyESHPVcADLQAK	K	I	3.2	0.514	0.77	174	177	Q9NX63-177	2
APR-2AB	CHCHD3	MICOS complex subunit MIC19 (Coiled-coil-helix-coiled-coil-helix domain-containing protein 3)	54927	Q9NX63	SQRySGAYGASVSDEELK	K	R	4.16	0.61	3.18	46	49	Q9NX63-49	10
APR-2AB	CHCHD3	MICOS complex subunit MIC19 (Coiled-coil-helix-coiled-coil-helix domain-containing protein 3)	54927	Q9NX63	YSGAyGASVSDEELK	R	R	3.67	0.601	8.35	49	53	Q9NX63-53	11
APR-2AB	TIMM10B	Mitochondrial import inner membrane translocase subunit Tim10 B (Fracture callus protein 1) (FxC1) (Mitochondrial import inner membrane translocase subunit Tim9 B) (TIMM10B) (Tim10b)	26515	Q9Y5J6	LMAAyVQLMPALVQR	R	R	2.85	0.544	0.602	63	67	Q9Y5J6-67	1
APR-2AB	TIMM10B	Mitochondrial import inner membrane translocase subunit Tim10 B (Fracture callus protein 1) (FxC1) (Mitochondrial import inner membrane translocase subunit Tim9 B) (TIMM10B) (Tim10b)	26515	Q9Y5J6	RIADyEAASAVPGVAAEQPGVSPSGS	R	-	3.46	0.523	3.14	78	82	Q9Y5J6-82	4
APR-2AB	TIMM13	Mitochondrial import inner membrane translocase subunit Tim13	26517	Q9Y5L4	YMDAWNTVSRAyNSR	R	L	2.69	0.458	3.29	73	84	Q9Y5L4-84	4

## Sheet: L2
Replicate	Gene Name	Gene Description	Entrez ID	UNIPROT ID	Peptide sequence	Previous amino acid	Next amino acid	SEQUEST XCorr score	SEQUEST DCn score	X! Tandem -log(e) score	Peptide START	Labeling site	UNIPROT-site	Unique Spectrum Count
Jun-2AB	UQCRQ	Cytochrome b-c1 complex subunit 8 (Complex III subunit 8) (Complex III subunit VIII) (Ubiquinol-cytochrome c reductase complex 9.5 kDa protein) (Ubiquinol-cytochrome c reductase complex ubiquinone-binding protein QP-C)	27089	O14949	NPAAyENDK	K	-	2.65	0.445	2.17	74	78	O14949-78	2
Jun-2AB	HTRA2	Serine protease HTRA2, mitochondrial (EC 3.4.21.108) (High temperature requirement protein A2) (HtrA2) (Omi stress-regulated endoprotease) (Serine protease 25) (Serine proteinase OMI)	27429	O43464	SQyNFIADVVEK	R	T	3.78	0.473	5.85	145	147	O43464-147	1
Jun-2AB	TBCA	Tubulin-specific chaperone A (TCP1-chaperonin cofactor A) (Tubulin-folding cofactor A) (CFA)	6902	O75347	MRAEDGENyDIKK	K	Q	3.57	0.362	1.07	40	48	O75347-48	3
Jun-2AB	NDUFB10	NADH dehydrogenase [ubiquinone] 1 beta subcomplex subunit 10 (Complex I-PDSW) (CI-PDSW) (NADH-ubiquinone oxidoreductase PDSW subunit)	4716	O96000	YQDLGAySSAR	R	K	3.25	0.467	5.2	137	143	O96000-143	1
Jun-2AB	ALDOA	Fructose-bisphosphate aldolase A (EC 4.1.2.13) (Lung cancer antigen NY-LU-1) (Muscle-type aldolase)	226	P04075	YTPSGQAGAAASESLFVSNHAy	K	-	5.65	0.68	10.4	343	364	P04075-364	20
Jun-2AB	ENO1	Alpha-enolase (EC 4.2.1.11) (2-phospho-D-glycerate hydro-lyase) (C-myc promoter-binding protein) (Enolase 1) (MBP-1) (MPB-1) (Non-neural enolase) (NNE) (Phosphopyruvate hydratase) (Plasminogen-binding protein)	2023	P06733	AAVPSGASTGIyEALELR	R	D	4.01	0.514	8.6	33	44	P06733-44	2
Jun-2AB	TUBB	Tubulin beta chain (Tubulin beta-5 chain)	203068	P07437	LTTPTyGDLNHLVSATMSGVTTcLR	K	F	1.88	0.00204	2.11	217	222	P07437-222	1
Jun-2AB	TUBB	Tubulin beta chain (Tubulin beta-5 chain)	203068	P07437	NSSyFVEWIPNNVK	K	T	2.18	0.452	2.89	337	340	P07437-340	1
Jun-2AB	PFN1	Profilin-1 (Epididymis tissue protein Li 184a) (Profilin I)	5216	P07737	cyEMASHLR	K	R	2.63	0.238	0.824	128	129	P07737-129	1
Jun-2AB	PFN1	Profilin-1 (Epididymis tissue protein Li 184a) (Profilin I)	5216	P07737	SSFyVNGLTLGGQK	R	C	3.59	0.397	3.21	57	60	P07737-60	6
Jun-2AB	HSP90AA1	Heat shock protein HSP 90-alpha (Heat shock 86 kDa) (HSP 86) (HSP86) (Lipopolysaccharide-associated protein 2) (LAP-2) (LPS-associated protein 2) (Renal carcinoma antigen NY-REN-38)	3320	P07900	yIDQEELNK	K	T	2.85	0.194	2.07	284	284	P07900-284	1
Jun-2AB	HSP90AA1	Heat shock protein HSP 90-alpha (Heat shock 86 kDa) (HSP 86) (HSP86) (Lipopolysaccharide-associated protein 2) (LAP-2) (LPS-associated protein 2) (Renal carcinoma antigen NY-REN-38)	3320	P07900	LVTSPccIVTSTyGWTANMER	R	I	4.1	0.469	0	592	604	P07900-604	1
Jun-2AB	HSP90AA1	Heat shock protein HSP 90-alpha (Heat shock 86 kDa) (HSP 86) (HSP86) (Lipopolysaccharide-associated protein 2) (LAP-2) (LPS-associated protein 2) (Renal carcinoma antigen NY-REN-38)	3320	P07900	DNSTMGyMAAK	R	K	2.6	0.382	0	621	627	P07900-627	1
Jun-2AB	HSP90AB1	Heat shock protein HSP 90-beta (HSP 90) (Heat shock 84 kDa) (HSP 84) (HSP84)	3326	P08238	yIDQEELNK	K	T	2.85	0.194	2.07	276	276	P08238-276	1
Jun-2AB	HSP90AB1	Heat shock protein HSP 90-beta (HSP 90) (Heat shock 84 kDa) (HSP 84) (HSP84)	3326	P08238	DNSTMGyMMAK	R	K	2.81	0.351	0	613	619	P08238-619	1
Jun-2AB	CYC1	Cytochrome c1, heme protein, mitochondrial (Complex III subunit 4) (Complex III subunit IV) (Cytochrome b-c1 complex subunit 4) (Ubiquinol-cytochrome-c reductase complex cytochrome c1 subunit) (Cytochrome c-1)	1537	P08574	LFDyFPKPYPNSEAAR	K	A	2.23	0.00945	2.36	171	174	P08574-174	1
Jun-2AB	HNRNPA1	Heterogeneous nuclear ribonucleoprotein A1 (hnRNP A1) (Helix-destabilizing protein) (Single-strand RNA-binding protein) (hnRNP core protein A1) [Cleaved into: Heterogeneous nuclear ribonucleoprotein A1, N-terminally processed]	3178	P09651	SSGPyGGGGQYFAKPR	R	N	3.03	0.332	6.77	337	341	P09651-341	2
Jun-2AB	HNRNPA1	Heterogeneous nuclear ribonucleoprotein A1 (hnRNP A1) (Helix-destabilizing protein) (Single-strand RNA-binding protein) (hnRNP core protein A1) [Cleaved into: Heterogeneous nuclear ribonucleoprotein A1, N-terminally processed]	3178	P09651	NQGGyGGSSSSSSYGSGR	R	R	4.77	0.756	4.64	353	357	P09651-357	5
Jun-2AB	HNRNPA1	Heterogeneous nuclear ribonucleoprotein A1 (hnRNP A1) (Helix-destabilizing protein) (Single-strand RNA-binding protein) (hnRNP core protein A1) [Cleaved into: Heterogeneous nuclear ribonucleoprotein A1, N-terminally processed]	3178	P09651	NQGGYGGSSSSSSyGSGR	R	R	4.69	0.601	5.22	353	366	P09651-366	4
Jun-2AB	HSPA1A	Heat shock 70 kDa protein 1A (Heat shock 70 kDa protein 1) (HSP70-1) (HSP70.1)	3303	P0DMV8	SINPDEAVAyGAAVQAAILMGDK	K	S	3.59	0.403	2.82	362	371	P0DMV8-371	3
Jun-2AB	MTHFD1	C-1-tetrahydrofolate synthase, cytoplasmic (C1-THF synthase) [Cleaved into: C-1-tetrahydrofolate synthase, cytoplasmic, N-terminally processed] [Includes: Methylenetetrahydrofolate dehydrogenase (EC 1.5.1.5); Methenyltetrahydrofolate cyclohydrolase (EC 3.5.4.9); Formyltetrahydrofolate synthetase (EC 6.3.4.3)]	4522	P11586	LAILQVGNRDDSNLyINVK	R	L	1.71	0.464	0	38	52	P11586-52	1
Jun-2AB	CKMT1A	Creatine kinase U-type, mitochondrial (EC 2.7.3.2) (Acidic-type mitochondrial creatine kinase) (Mia-CK) (Ubiquitous mitochondrial creatine kinase) (U-MtCK)	1159	P12532	LGyILTcPSNLGTGLR	R	A	4.15	0.542	3.77	310	312	P12532-312	4
Jun-2AB	H2AFX	Histone H2AX (H2a/x) (Histone H2A.X)	3014	P16104	ATQASQEy	K	-	2.61	0.357	1.68	136	143	P16104-143	1
Jun-2AB	HNRNPA2B1	Heterogeneous nuclear ribonucleoproteins A2/B1 (hnRNP A2/B1)	3181	P22626	yHTINGHNAEVR	K	K	2.88	0.407	1.57	174	174	P22626-174	2
Jun-2AB	HNRNPA2B1	Heterogeneous nuclear ribonucleoproteins A2/B1 (hnRNP A2/B1)	3181	P22626	GGSDGyGSGR	R	G	2.45	0.297	1.26	229	234	P22626-234	3
Jun-2AB	HNRNPA2B1	Heterogeneous nuclear ribonucleoproteins A2/B1 (hnRNP A2/B1)	3181	P22626	NmGGPyGGGNYGPGGSGGSGGYGGR	R	S	4.25	0.588	4.6	326	331	P22626-331	3
Jun-2AB	HNRNPA2B1	Heterogeneous nuclear ribonucleoproteins A2/B1 (hnRNP A2/B1)	3181	P22626	NMGGPYGGGNyGPGGSGGSGGYGGR	R	S	3.92	0.388	4.43	326	336	P22626-336	2
Jun-2AB	HNRNPA2B1	Heterogeneous nuclear ribonucleoproteins A2/B1 (hnRNP A2/B1)	3181	P22626	NMGGPYGGGNYGPGGSGGSGGyGGR	R	S	5.29	0.482	2.82	326	347	P22626-347	2
Jun-2AB	EEF1D	Elongation factor 1-delta (EF-1-delta) (Antigen NY-CO-4)	1936	P29692	LVPVGyGIR	K	K	2.61	0.369	1.24	233	238	P29692-238	2
Jun-2AB	EEF1D	Elongation factor 1-delta (EF-1-delta) (Antigen NY-CO-4)	1936	P29692	YDDAERRFyEQMNGPVAGASR	K	Q	2.68	0.328	1.96	18	26	P29692-26	2
Jun-2AB	PHB	Prohibitin	5245	P35232	KLEAAEDIAyQLSR	R	S	4.41	0.564	6.39	240	249	P35232-249	9
Jun-2AB	TAGLN2	Transgelin-2 (Epididymis tissue protein Li 7e) (SM22-alpha homolog)	8407	P37802	GASQAGMTGyGMPR	R	Q	3.88	0.411	8.06	183	192	P37802-192	18
Jun-2AB	TAGLN2	Transgelin-2 (Epididymis tissue protein Li 7e) (SM22-alpha homolog)	8407	P37802	GPAyGLSR	R	E	2.44	0.32	3.17	5	8	P37802-8	2
Jun-2AB	RBMX	RNA-binding motif protein, X chromosome (Glycoprotein p43) (Heterogeneous nuclear ribonucleoprotein G) (hnRNP G) [Cleaved into: RNA-binding motif protein, X chromosome, N-terminally processed]	27316	P38159	DRDySDHPSGGSYR	R	D	3.07	0.446	0	269	272	P38159-272	1
Jun-2AB	VDAC2	Voltage-dependent anion-selective channel protein 2 (VDAC-2) (hVDAC2) (Outer mitochondrial membrane protein porin 2)	7417	P45880	NNFAVGyR	R	T	2.56	0.365	1.57	178	184	P45880-184	1
Jun-2AB	NDUFA8	NADH dehydrogenase [ubiquinone] 1 alpha subcomplex subunit 8 (Complex I-19kD) (CI-19kD) (Complex I-PGIV) (CI-PGIV) (NADH-ubiquinone oxidoreductase 19 kDa subunit)	4702	P51970	HcAEPFTEYWTcIDyTGQQLFR	R	H	3.7	0.539	1.77	77	91	P51970-91	2
Jun-2AB	ROMO1	Reactive oxygen species modulator 1 (ROS modulator 1) (Epididymis tissue protein Li 175) (Glyrichin) (Mitochondrial targeting GxxxG motif protein) (MTGM) (Protein MGR2 homolog)	140823	P60602	PVAVGPyGQSQPScFDR	M	V	0	0	4.34	2	8	P60602-8	1
Jun-2AB	ACTB	Actin, cytoplasmic 1 (Beta-actin) [Cleaved into: Actin, cytoplasmic 1, N-terminally processed]	60	P60709	TTGIVMDSGDGVTHTVPIyEGyALPHAILR	R	L	4.28	0.425	6.64	148	166	P60709-166	3
Jun-2AB	ACTB	Actin, cytoplasmic 1 (Beta-actin) [Cleaved into: Actin, cytoplasmic 1, N-terminally processed]	60	P60709	TTGIVMDSGDGVTHTVPIYEGyALPHAILR	R	L	5.81	0.569	8.66	148	169	P60709-169	15
Jun-2AB	ACTB	Actin, cytoplasmic 1 (Beta-actin) [Cleaved into: Actin, cytoplasmic 1, N-terminally processed]	60	P60709	ILTERGySFTTTAER	K	E	3.62	0.385	1.96	192	198	P60709-198	3
Jun-2AB	ACTB	Actin, cytoplasmic 1 (Beta-actin) [Cleaved into: Actin, cytoplasmic 1, N-terminally processed]	60	P60709	IWHHTFyNELR	K	V	3.63	0.426	3.55	85	91	P60709-91	3
Jun-2AB	RPS3A	40S ribosomal protein S3a (v-fos transformation effector protein) (Fte-1)	6189	P61247	VERADGyEPPVQESV	K	-	3.39	0.507	1.85	250	256	P61247-256	4
Jun-2AB	HNRNPK	Heterogeneous nuclear ribonucleoprotein K (hnRNP K) (Transformation up-regulated nuclear protein) (TUNP)	3190	P61978	ALRTDyNASVSVPDSSGPER	K	I	3.09	0.165	1.92	67	72	P61978-72	2
Jun-2AB	HIST1H4A	Histone H4	8359	P62805	TVTAMDVVyALKR	K	Q	3.42	0.392	2.44	81	89	P62805-89	5
Jun-2AB	EIF5A	Eukaryotic translation initiation factor 5A-1 (eIF-5A-1) (eIF-5A1) (Eukaryotic initiation factor 5A isoform 1) (eIF-5A) (Rev-binding factor) (eIF-4D)	1984	P63241	NDFQLIGIQDGyLSLLQDSGEVR	R	E	4.92	0.595	6.85	87	98	P63241-98	10
Jun-2AB	YBX1	Nuclease-sensitive element-binding protein 1 (CCAAT-binding transcription factor I subunit A) (CBF-A) (DNA-binding protein B) (DBPB) (Enhancer factor I subunit A) (EFI-A) (Y-box transcription factor) (Y-box-binding protein 1) (YB-1)	4904	P67809	NYQQNyQNSESGEKNEGSESAPEGQAQQR	R	R	4.09	0.676	3.96	157	162	P67809-162	2
Jun-2AB	YBX1	Nuclease-sensitive element-binding protein 1 (CCAAT-binding transcription factor I subunit A) (CBF-A) (DNA-binding protein B) (DBPB) (Enhancer factor I subunit A) (EFI-A) (Y-box transcription factor) (Y-box-binding protein 1) (YB-1)	4904	P67809	RPQySNPPVQGEVMEGADNQGAGEQGRPVR	R	Q	3.13	0.329	2.82	205	208	P67809-208	3
Jun-2AB	EEF1A1	Elongation factor 1-alpha 1 (EF-1-alpha-1) (Elongation factor Tu) (EF-Tu) (Eukaryotic elongation factor 1 A-1) (eEF1A-1) (Leukocyte receptor cluster member 7)	1915	P68104	EHALLAyTLGVK	R	Q	2.94	0.511	1.59	135	141	P68104-141	1
Jun-2AB	EEF1A1	Elongation factor 1-alpha 1 (EF-1-alpha-1) (Elongation factor Tu) (EF-Tu) (Eukaryotic elongation factor 1 A-1) (eEF1A-1) (Leukocyte receptor cluster member 7)	1915	P68104	LPLQDVyK	R	I	2.18	0.181	1.92	248	254	P68104-254	2
Jun-2AB	TUBA1B	Tubulin alpha-1B chain (Alpha-tubulin ubiquitous) (Tubulin K-alpha-1) (Tubulin alpha-ubiquitous chain)	10376	P68363	VGINyQPPTVVPGGDLAK	K	V	3.06	0.454	2.2	353	357	P68363-357	4
Jun-2AB	RBM3	RNA-binding protein 3 (RNA-binding motif protein 3) (RNPL)	5935	P98179	YSGGNyRDNYDN	R	-	2.55	0.469	0	146	151	P98179-151	1
Jun-2AB	CYCS	Cytochrome c	54205	P99999	TGQAPGySYTAANK	K	N	2.94	0.453	2.74	41	47	P99999-47	1
Jun-2AB	CLTC	Clathrin heavy chain 1 (Clathrin heavy chain on chromosome 17) (CLH-17)	1213	Q00610	TSIDAyDNFDNISLAQR	R	L	2.38	0.357	5.21	1482	1487	Q00610-1487	1
Jun-2AB	CIRBP	Cold-inducible RNA-binding protein (A18 hnRNP) (Glycine-rich RNA-binding protein CIRP)	1153	Q14011	SQSGGySDR	R	S	2.29	0.242	1.74	146	151	Q14011-151	1
Jun-2AB	CIRBP	Cold-inducible RNA-binding protein (A18 hnRNP) (Glycine-rich RNA-binding protein CIRP)	1153	Q14011	SSGGSyRDSYDSYATHNE	R	-	2.15	0.604	2.59	155	160	Q14011-160	1
Jun-2AB	CIRBP	Cold-inducible RNA-binding protein (A18 hnRNP) (Glycine-rich RNA-binding protein CIRP)	1153	Q14011	DSYDSyATHNE	R	-	2.92	0.566	2.62	162	167	Q14011-167	1
Jun-2AB	CTTN	Src substrate cortactin (Amplaxin) (Oncogene EMS1)	2017	Q14247	GPVSGTEPEPVYSMEAADyR	R	E	3.24	0.499	3.1	435	453	Q14247-453	1
Jun-2AB	ALYREF	THO complex subunit 4 (Tho4) (Ally of AML-1 and LEF-1) (Aly/REF export factor) (Transcriptional coactivator Aly/REF) (bZIP-enhancing factor BEF)	10189	Q86V81	QQLSAEELDAQLDAyNAR	K	M	4.06	0.309	0	236	250	Q86V81-250	4
Jun-2AB	ALYREF	THO complex subunit 4 (Tho4) (Ally of AML-1 and LEF-1) (Aly/REF export factor) (Transcriptional coactivator Aly/REF) (bZIP-enhancing factor BEF)	10189	Q86V81	NRPAPySRPK	R	Q	2.8	0.413	0	72	77	Q86V81-77	2
Jun-2AB	UPF1	Regulator of nonsense transcripts 1 (EC 3.6.4.-) (ATP-dependent helicase RENT1) (Nonsense mRNA reducing factor 1) (NORF1) (Up-frameshift suppressor 1 homolog) (hUpf1)	5976	Q92900	AyQHGGVTGLSQY	R	-	2.95	0.423	0	1117	1118	Q92900-1118	1
Jun-2AB	UPF1	Regulator of nonsense transcripts 1 (EC 3.6.4.-) (ATP-dependent helicase RENT1) (Nonsense mRNA reducing factor 1) (NORF1) (Up-frameshift suppressor 1 homolog) (hUpf1)	5976	Q92900	AYQHGGVTGLSQy	R	-	2.98	0.424	2.74	1117	1129	Q92900-1129	1
Jun-2AB	PPP1R14B	Protein phosphatase 1 regulatory subunit 14B (Phospholipase C-beta-3 neighbouring gene protein)	26472	Q96C90	VyFQSPPGAAGEGPGGADDEGPVRR	R	Q	3.76	0.373	1.43	28	29	Q96C90-29	2
Jun-2AB	PHB2	Prohibitin-2 (B-cell receptor-associated protein BAP37) (D-prohibitin) (Repressor of estrogen receptor activity)	11331	Q99623	VLSRPNAQELPSMyQR	R	L	3.98	0.339	0.959	108	121	Q99623-121	2
Jun-2AB	PHB2	Prohibitin-2 (B-cell receptor-associated protein BAP37) (D-prohibitin) (Repressor of estrogen receptor activity)	11331	Q99623	LLLGAGAVAyGVR	K	E	3.44	0.487	3.96	25	34	Q99623-34	2
Jun-2AB	PHB2	Prohibitin-2 (B-cell receptor-associated protein BAP37) (D-prohibitin) (Repressor of estrogen receptor activity)	11331	Q99623	IPWFQyPIIYDIR	R	A	3.05	0.469	2.01	72	77	Q99623-77	3
Jun-2AB	HNRNPAB	Heterogeneous nuclear ribonucleoprotein A/B (hnRNP A/B) (APOBEC1-binding protein 1) (ABBP-1)	3182	Q99729	EVYQQQQyGSGGR	K	G	3.57	0.571	1.8	233	240	Q99729-240	3
Jun-2AB	PTGES2	Prostaglandin E synthase 2 (Membrane-associated prostaglandin E synthase-2) (mPGE synthase-2) (Microsomal prostaglandin E synthase 2) (mPGES-2) (Prostaglandin-H(2) E-isomerase) (EC 5.3.99.3) [Cleaved into: Prostaglandin E synthase 2 truncated form]	80142	Q9H7Z7	TPTEALASFDyIVR	R	E	3.03	0.406	0	253	263	Q9H7Z7-263	1
Jun-2AB	DIABLO	Diablo homolog, mitochondrial (Direct IAP-binding protein with low pI) (Second mitochondria-derived activator of caspase) (Smac)	56616	Q9NR28	AVyTLTSLYR	K	Q	2.66	0.394	1.54	106	108	Q9NR28-108	1
Jun-2AB	DIABLO	Diablo homolog, mitochondrial (Direct IAP-binding protein with low pI) (Second mitochondria-derived activator of caspase) (Smac)	56616	Q9NR28	AVYTLTSLyR	K	Q	2.42	0.299	5.7	106	114	Q9NR28-114	3
Jun-2AB	DIABLO	Diablo homolog, mitochondrial (Direct IAP-binding protein with low pI) (Second mitochondria-derived activator of caspase) (Smac)	56616	Q9NR28	AESEQEAyLRED	R	-	3.34	0.435	2.7	228	235	Q9NR28-235	6
Jun-2AB	OCIAD1	OCIA domain-containing protein 1 (Ovarian carcinoma immunoreactive antigen)	54940	Q9NX40	RSSPPGHyYQK	R	S	3.02	0.485	0	121	128	Q9NX40-128	1
Jun-2AB	OCIAD1	OCIA domain-containing protein 1 (Ovarian carcinoma immunoreactive antigen)	54940	Q9NX40	NRESyEVSLTQK	K	T	3.86	0.35	0	206	210	Q9NX40-210	1
Jun-2AB	CHCHD3	MICOS complex subunit MIC19 (Coiled-coil-helix-coiled-coil-helix domain-containing protein 3)	54927	Q9NX63	VTTEQyQK	R	A	2.83	0.275	1.55	158	163	Q9NX63-163	2
Jun-2AB	CHCHD3	MICOS complex subunit MIC19 (Coiled-coil-helix-coiled-coil-helix domain-containing protein 3)	54927	Q9NX63	FKRyESHPVcADLQAK	K	I	2.87	0.349	1.32	174	177	Q9NX63-177	1
Jun-2AB	CHCHD3	MICOS complex subunit MIC19 (Coiled-coil-helix-coiled-coil-helix domain-containing protein 3)	54927	Q9NX63	ySGAYGASVSDEELK	R	R	4.57	0.6	7.89	49	49	Q9NX63-49	2
Jun-2AB	CHCHD3	MICOS complex subunit MIC19 (Coiled-coil-helix-coiled-coil-helix domain-containing protein 3)	54927	Q9NX63	YSGAyGASVSDEELK	R	R	4.88	0.514	1.77	49	53	Q9NX63-53	7
Jun-2AB	CDV3	Protein CDV3 homolog	55573	Q9UKY7	LQLDNQyAVLENQK	K	S	3.09	0.447	2.15	238	244	Q9UKY7-244	1

## Sheet: L3
Replicate	Gene Name	Gene Description	Entrez ID	UNIPROT ID	Peptide sequence	Previous amino acid	Next amino acid	SEQUEST XCorr score	SEQUEST DCn score	X! Tandem -log(e) score	Peptide START	Labeling site	UNIPROT-site	Unique Spectrum Count
JUL-2AB	NDUFA4	Cytochrome c oxidase subunit NDUFA4 (Complex I-MLRQ) (CI-MLRQ) (NADH-ubiquinone oxidoreductase MLRQ subunit)	4697	O00483	LGPNDQYKFySVNVDYSK	K	L	0	0	2.96	56	65	O00483-65	1
JUL-2AB	HTRA2	Serine protease HTRA2, mitochondrial (EC 3.4.21.108) (High temperature requirement protein A2) (HtrA2) (Omi stress-regulated endoprotease) (Serine protease 25) (Serine proteinase OMI)	27429	O43464	SQyNFIADVVEK	R	T	3.05	0.352	2.8	145	147	O43464-147	1
JUL-2AB	TIMM17B	Mitochondrial import inner membrane translocase subunit Tim17-B	10245	O60830	DGTPAPGyPSYQQYH	K	-	2.93	0.455	0	158	165	O60830-165	1
JUL-2AB	TIMM17B	Mitochondrial import inner membrane translocase subunit Tim17-B	10245	O60830	DGTPAPGYPSyQQYH	K	-	3.37	0.458	1.55	158	168	O60830-168	3
JUL-2AB	DPM2	Dolichol phosphate-mannose biosynthesis regulatory protein (Dolichol-phosphate mannose synthase subunit 2) (DPM synthase subunit 2)	8818	O94777	AyAVAIPLAAGLLLLLFVGLFISyVmLKTK	R	R	1.96	0.755	0	48	49	O94777-49	4
JUL-2AB	DPM2	Dolichol phosphate-mannose biosynthesis regulatory protein (Dolichol-phosphate mannose synthase subunit 2) (DPM synthase subunit 2)	8818	O94777	AyAVAIPLAAGLLLLLFVGLFISyVmLKTK	R	R	1.96	0.755	0	48	71	O94777-71	4
JUL-2AB	TOMM70A	Mitochondrial import receptor subunit TOM70 (Mitochondrial precursor proteins import receptor) (Translocase of outer membrane 70 kDa subunit)	9868	O94826	QAyTGNNSSQIQAAMK	R	G	3.62	0.416	1.52	448	450	O94826-450	1
JUL-2AB	AIFM1	Apoptosis-inducing factor 1, mitochondrial (EC 1.1.1.-) (Programmed cell death protein 8)	9131	O95831	ILPEyLSNWTMEK	K	V	1.85	0.56	0	343	347	O95831-347	1
JUL-2AB	NDUFB10	NADH dehydrogenase [ubiquinone] 1 beta subcomplex subunit 10 (Complex I-PDSW) (CI-PDSW) (NADH-ubiquinone oxidoreductase PDSW subunit)	4716	O96000	EGQNyQQNcIK	R	E	2.75	0.411	2.74	111	115	O96000-115	4
JUL-2AB	NDUFB10	NADH dehydrogenase [ubiquinone] 1 beta subcomplex subunit 10 (Complex I-PDSW) (CI-PDSW) (NADH-ubiquinone oxidoreductase PDSW subunit)	4716	O96000	AYQDRyQDLGAYSSAR	K	K	2.18	0.14	2.13	132	137	O96000-137	1
JUL-2AB	NDUFB10	NADH dehydrogenase [ubiquinone] 1 beta subcomplex subunit 10 (Complex I-PDSW) (CI-PDSW) (NADH-ubiquinone oxidoreductase PDSW subunit)	4716	O96000	RDyKVDQEIINIMQDR	K	L	3.7	0.463	1.62	88	90	O96000-90	1
JUL-2AB	ALDOA	Fructose-bisphosphate aldolase A (EC 4.1.2.13) (Lung cancer antigen NY-LU-1) (Muscle-type aldolase)	226	P04075	YTPSGQAGAAASESLFVSNHAy	K	-	5.27	0.648	8.8	343	364	P04075-364	6
JUL-2AB	ENO1	Alpha-enolase (EC 4.2.1.11) (2-phospho-D-glycerate hydro-lyase) (C-myc promoter-binding protein) (Enolase 1) (MBP-1) (MPB-1) (Non-neural enolase) (NNE) (Phosphopyruvate hydratase) (Plasminogen-binding protein)	2023	P06733	AAVPSGASTGIyEALELR	R	D	4.23	0.467	1.13	33	44	P06733-44	1
JUL-2AB	PFN1	Profilin-1 (Epididymis tissue protein Li 184a) (Profilin I)	5216	P07737	SSFyVNGLTLGGQK	R	C	3.35	0.372	0	57	60	P07737-60	3
JUL-2AB	HSP90AA1	Heat shock protein HSP 90-alpha (Heat shock 86 kDa) (HSP 86) (HSP86) (Lipopolysaccharide-associated protein 2) (LAP-2) (LPS-associated protein 2) (Renal carcinoma antigen NY-REN-38)	3320	P07900	LVTSPccIVTSTyGWTANMER	R	I	3.1	0.379	0	592	604	P07900-604	1
JUL-2AB	CYC1	Cytochrome c1, heme protein, mitochondrial (Complex III subunit 4) (Complex III subunit IV) (Cytochrome b-c1 complex subunit 4) (Ubiquinol-cytochrome-c reductase complex cytochrome c1 subunit) (Cytochrome c-1)	1537	P08574	HLVGVcyTEDEAK	R	E	3.24	0.413	1.64	134	140	P08574-140	4
JUL-2AB	CYC1	Cytochrome c1, heme protein, mitochondrial (Complex III subunit 4) (Complex III subunit IV) (Cytochrome b-c1 complex subunit 4) (Ubiquinol-cytochrome-c reductase complex cytochrome c1 subunit) (Cytochrome c-1)	1537	P08574	LFDyFPKPYPNSEAAR	K	A	3.25	0.432	1.31	171	174	P08574-174	1
JUL-2AB	HNRNPA1	Heterogeneous nuclear ribonucleoprotein A1 (hnRNP A1) (Helix-destabilizing protein) (Single-strand RNA-binding protein) (hnRNP core protein A1) [Cleaved into: Heterogeneous nuclear ribonucleoprotein A1, N-terminally processed]	3178	P09651	NQGGyGGSSSSSSYGSGR	R	R	3.2	0.563	2.72	353	357	P09651-357	1
JUL-2AB	HNRNPA1	Heterogeneous nuclear ribonucleoprotein A1 (hnRNP A1) (Helix-destabilizing protein) (Single-strand RNA-binding protein) (hnRNP core protein A1) [Cleaved into: Heterogeneous nuclear ribonucleoprotein A1, N-terminally processed]	3178	P09651	NQGGYGGSSSSSSyGSGR	R	R	4.13	0.598	10.5	353	366	P09651-366	2
JUL-2AB	HSPA1A	Heat shock 70 kDa protein 1A (Heat shock 70 kDa protein 1) (HSP70-1) (HSP70.1)	3303	P0DMV8	ELEQVcNPIISGLyQGAGGPGPGGFGAQGPK	K	G	3.86	0.513	3.05	598	611	P0DMV8-611	1
JUL-2AB	CKMT1A	Creatine kinase U-type, mitochondrial (EC 2.7.3.2) (Acidic-type mitochondrial creatine kinase) (Mia-CK) (Ubiquitous mitochondrial creatine kinase) (U-MtCK)	1159	P12532	LGyILTcPSNLGTGLR	R	A	4.97	0.627	4.3	310	312	P12532-312	6
JUL-2AB	COX4I1	Cytochrome c oxidase subunit 4 isoform 1, mitochondrial (Cytochrome c oxidase polypeptide IV) (Cytochrome c oxidase subunit IV isoform 1) (COX IV-1)	1327	P13073	HYVyGPLPQSFDKEWVAK	K	Q	3.46	0.299	1.77	123	126	P13073-126	2
JUL-2AB	VDAC1	Voltage-dependent anion-selective channel protein 1 (VDAC-1) (hVDAC1) (Outer mitochondrial membrane protein porin 1) (Plasmalemmal porin) (Porin 31HL) (Porin 31HM)	7416	P21796	YRWTEyGLTFTEK	K	W	4.39	0.67	3.03	62	67	P21796-67	4
JUL-2AB	HNRNPA2B1	Heterogeneous nuclear ribonucleoproteins A2/B1 (hnRNP A2/B1)	3181	P22626	NMGGPyGGGNYGPGGSGGSGGYGGR	R	S	3.07	0.454	1.7	326	331	P22626-331	1
JUL-2AB	HNRNPA2B1	Heterogeneous nuclear ribonucleoproteins A2/B1 (hnRNP A2/B1)	3181	P22626	NMGGPYGGGNyGPGGSGGSGGYGGR	R	S	3.82	0.488	0	326	336	P22626-336	1
JUL-2AB	PHB	Prohibitin	5245	P35232	KLEAAEDIAyQLSR	R	S	5.1	0.607	6.89	240	249	P35232-249	5
JUL-2AB	TAGLN2	Transgelin-2 (Epididymis tissue protein Li 7e) (SM22-alpha homolog)	8407	P37802	GASQAGMTGyGmPR	R	Q	3.48	0.578	3.55	183	192	P37802-192	5
JUL-2AB	VDAC2	Voltage-dependent anion-selective channel protein 2 (VDAC-2) (hVDAC2) (Outer mitochondrial membrane protein porin 2)	7417	P45880	WcEyGLTFTEK	K	W	3.61	0.343	2	75	78	P45880-78	1
JUL-2AB	NDUFA8	NADH dehydrogenase [ubiquinone] 1 alpha subcomplex subunit 8 (Complex I-19kD) (CI-19kD) (Complex I-PGIV) (CI-PGIV) (NADH-ubiquinone oxidoreductase 19 kDa subunit)	4702	P51970	TDRPLPENPyHSRPRPDPSPEIEGDLQPATHGSR	K	F	0	0	1.19	133	142	P51970-142	1
JUL-2AB	NDUFA8	NADH dehydrogenase [ubiquinone] 1 alpha subcomplex subunit 8 (Complex I-19kD) (CI-19kD) (Complex I-PGIV) (CI-PGIV) (NADH-ubiquinone oxidoreductase 19 kDa subunit)	4702	P51970	HcAEPFTEYWTcIDyTGQQLFR	R	H	4.76	0.497	2.32	77	91	P51970-91	4
JUL-2AB	HCCS	Cytochrome c-type heme lyase (CCHL) (EC 4.4.1.17) (Holocytochrome c-type synthase)	3052	P53701	AyEYVEcPIR	R	G	2.46	0.348	2.33	60	61	P53701-61	1
JUL-2AB	HCCS	Cytochrome c-type heme lyase (CCHL) (EC 4.4.1.17) (Holocytochrome c-type synthase)	3052	P53701	AYEyVEcPIR	R	G	2.71	0.3	1.54	60	63	P53701-63	3
JUL-2AB	ATP5I	ATP synthase subunit e, mitochondrial (ATPase subunit e)	521	P56385	YSALFLGVAYGATRyNYLKPR	R	A	3.19	0.503	3.21	16	30	P56385-30	1
JUL-2AB	ROMO1	Reactive oxygen species modulator 1 (ROS modulator 1) (Epididymis tissue protein Li 175) (Glyrichin) (Mitochondrial targeting GxxxG motif protein) (MTGM) (Protein MGR2 homolog)	140823	P60602	PVAVGPyGQSQPScFDR	M	V	0	0	2.44	2	8	P60602-8	3
JUL-2AB	ACTB	Actin, cytoplasmic 1 (Beta-actin) [Cleaved into: Actin, cytoplasmic 1, N-terminally processed]	60	P60709	TTGIVMDSGDGVTHTVPIyEGYALPHAILR	R	L	3.92	0.592	1.89	148	166	P60709-166	8
JUL-2AB	ACTB	Actin, cytoplasmic 1 (Beta-actin) [Cleaved into: Actin, cytoplasmic 1, N-terminally processed]	60	P60709	TTGIVMDSGDGVTHTVPIYEGyALPHAILR	R	L	4.92	0.624	3.17	148	169	P60709-169	18
JUL-2AB	ACTB	Actin, cytoplasmic 1 (Beta-actin) [Cleaved into: Actin, cytoplasmic 1, N-terminally processed]	60	P60709	ILTERGySFTTTAER	K	E	3.32	0.571	3.41	192	198	P60709-198	2
JUL-2AB	ACTB	Actin, cytoplasmic 1 (Beta-actin) [Cleaved into: Actin, cytoplasmic 1, N-terminally processed]	60	P60709	IWHHTFyNELR	K	V	3.26	0.412	0	85	91	P60709-91	3
JUL-2AB	RPS3A	40S ribosomal protein S3a (v-fos transformation effector protein) (Fte-1)	6189	P61247	VERADGyEPPVQESV	K	-	3.1	0.544	0	250	256	P61247-256	2
JUL-2AB	CNBP	Cellular nucleic acid-binding protein (CNBP) (Zinc finger protein 9)	7555	P62633	TSEVNcyRcGESGHLAR	K	E	3.46	0.518	0	153	159	P62633-159	2
JUL-2AB	EIF5A	Eukaryotic translation initiation factor 5A-1 (eIF-5A-1) (eIF-5A1) (Eukaryotic initiation factor 5A isoform 1) (eIF-5A) (Rev-binding factor) (eIF-4D)	1984	P63241	RNDFQLIGIQDGyLSLLQDSGEVR	K	E	5.28	0.597	3.31	86	98	P63241-98	4
JUL-2AB	YBX1	Nuclease-sensitive element-binding protein 1 (CCAAT-binding transcription factor I subunit A) (CBF-A) (DNA-binding protein B) (DBPB) (Enhancer factor I subunit A) (EFI-A) (Y-box transcription factor) (Y-box-binding protein 1) (YB-1)	4904	P67809	NYQQNyQNSESGEKNEGSESAPEGQAQQR	R	R	5.83	0.687	5.96	157	162	P67809-162	8
JUL-2AB	YBX1	Nuclease-sensitive element-binding protein 1 (CCAAT-binding transcription factor I subunit A) (CBF-A) (DNA-binding protein B) (DBPB) (Enhancer factor I subunit A) (EFI-A) (Y-box transcription factor) (Y-box-binding protein 1) (YB-1)	4904	P67809	RPQySNPPVQGEVMEGADNQGAGEQGRPVR	R	Q	4.9	0.609	0	205	208	P67809-208	6
JUL-2AB	TUBA1B	Tubulin alpha-1B chain (Alpha-tubulin ubiquitous) (Tubulin K-alpha-1) (Tubulin alpha-ubiquitous chain)	10376	P68363	VGINyQPPTVVPGGDLAK	K	V	3.32	0.431	2.27	353	357	P68363-357	2
JUL-2AB	RBM3	RNA-binding protein 3 (RNA-binding motif protein 3) (RNPL)	5935	P98179	YYDSRPGGYGyGYGR	R	S	3.18	0.431	0	117	127	P98179-127	1
JUL-2AB	RBM3	RNA-binding protein 3 (RNA-binding motif protein 3) (RNPL)	5935	P98179	YYDSRPGGYGYGyGR	R	S	2.99	0.495	2.68	117	129	P98179-129	1
JUL-2AB	RBM3	RNA-binding protein 3 (RNA-binding motif protein 3) (RNPL)	5935	P98179	NQGGyDRYSGGNYR	R	D	1.72	0.0197	1.28	139	143	P98179-143	1
JUL-2AB	CYCS	Cytochrome c	54205	P99999	TGQAPGySYTAANK	K	N	2.71	0.476	0	41	47	P99999-47	1
JUL-2AB	CYCS	Cytochrome c	54205	P99999	TGQAPGYSyTAANK	K	N	4.05	0.557	3.55	41	49	P99999-49	1
JUL-2AB	CIRBP	Cold-inducible RNA-binding protein (A18 hnRNP) (Glycine-rich RNA-binding protein CIRP)	1153	Q14011	SSGGSYRDSyDSYATHNE	R	-	3.38	0.646	2.18	155	164	Q14011-164	2
JUL-2AB	CTTN	Src substrate cortactin (Amplaxin) (Oncogene EMS1)	2017	Q14247	AELSyRGPVSGTEPEPVYSMEAADYR	K	E	4.14	0.394	6.05	429	433	Q14247-433	1
JUL-2AB	CYP51A1	Lanosterol 14-alpha demethylase (LDM) (EC 1.14.13.70) (CYPLI) (Cytochrome P450 51A1) (Cytochrome P450-14DM) (Cytochrome P45014DM) (Cytochrome P450LI) (Sterol 14-alpha demethylase)	1595	Q16850	NEDLNAEDVySRLTTPVFGK	K	G	3.22	0.493	2.66	122	131	Q16850-131	1
JUL-2AB	IMMT	MICOS complex subunit MIC60 (Cell proliferation-inducing gene 4/52 protein) (Mitochondrial inner membrane protein) (Mitofilin) (p87/89)	10989	Q16891	VVSQyHELVVQAR	K	D	3.98	0.473	0	354	358	Q16891-358	4
JUL-2AB	IMMT	MICOS complex subunit MIC60 (Cell proliferation-inducing gene 4/52 protein) (Mitochondrial inner membrane protein) (Mitofilin) (p87/89)	10989	Q16891	LFEMVLGPAAyNVPLPK	K	K	2.73	0.365	1.85	85	95	Q16891-95	1
JUL-2AB	TIMM50	Mitochondrial import inner membrane translocase subunit TIM50	92609	Q3ZCQ8	TVLEHyALEDDPLAAFK	R	Q	3.17	0.593	0.602	296	301	Q3ZCQ8-301	1
JUL-2AB	AGK	Acylglycerol kinase, mitochondrial (hAGK) (EC 2.7.1.107) (EC 2.7.1.94) (Multiple substrate lipid kinase) (HsMuLK) (MuLK) (Multi-substrate lipid kinase)	55750	Q53H12	LASyWAQPQDALSQEVSPEVWK	R	D	3.84	0.402	4.68	283	286	Q53H12-286	1
JUL-2AB	COX20	Cytochrome c oxidase protein 20 homolog	116228	Q5RI15	ILyEGTHLDPER	K	K	2.81	0.435	0	99	101	Q5RI15-101	2
JUL-2AB	TTN	Titin	7273	Q8WZ42	mSFVDSVAVLEmHNLSVEDSGDyTcEAHNAAGSASSSTSLKVK	R	E	4.45	0.376	0	8281	8303	Q8WZ42-8303	1
JUL-2AB	UPF1	Regulator of nonsense transcripts 1 (EC 3.6.4.-) (ATP-dependent helicase RENT1) (Nonsense mRNA reducing factor 1) (NORF1) (Up-frameshift suppressor 1 homolog) (hUpf1)	5976	Q92900	LVVLGIRPIRLQVQyR	R	M	1.17	0.717	0	699	713	Q92900-713	1
JUL-2AB	PPP1R14B	Protein phosphatase 1 regulatory subunit 14B (Phospholipase C-beta-3 neighbouring gene protein)	26472	Q96C90	VyFQSPPGAAGEGPGGADDEGPVRR	R	Q	2.57	0.356	2.19	28	29	Q96C90-29	1
JUL-2AB	PHB2	Prohibitin-2 (B-cell receptor-associated protein BAP37) (D-prohibitin) (Repressor of estrogen receptor activity)	11331	Q99623	VLSRPNAQELPSMyQR	R	L	2.67	0.241	0.745	108	121	Q99623-121	3
JUL-2AB	APOO	MICOS complex subunit MIC26 (Apolipoprotein O) (MICOS complex subunit MIC23) (Protein FAM121B)	79135	Q9BUR5	VDELSLYSVPEGQSKyVEEAR	K	S	3.19	0.325	1.39	37	52	Q9BUR5-52	3
JUL-2AB	CLPB	Caseinolytic peptidase B protein homolog (EC 3.6.1.3) (Suppressor of potassium transport defect 3)	81570	Q9H078	FIGSPPGyVGHEEGGQLTK	K	K	3.31	0.372	0	423	430	Q9H078-430	1
JUL-2AB	GHITM	Growth hormone-inducible transmembrane protein (Dermal papilla-derived protein 2) (Mitochondrial morphology and cristae structure 1) (MICS1) (Transmembrane BAX inhibitor motif-containing protein 5)	27069	Q9H3K2	RAEVSPMyGVQK	K	Y	4	0.418	0.721	301	308	Q9H3K2-308	1
JUL-2AB	PTGES2	Prostaglandin E synthase 2 (Membrane-associated prostaglandin E synthase-2) (mPGE synthase-2) (Microsomal prostaglandin E synthase 2) (mPGES-2) (Prostaglandin-H(2) E-isomerase) (EC 5.3.99.3) [Cleaved into: Prostaglandin E synthase 2 truncated form]	80142	Q9H7Z7	TYLVSGQPLEEIITYyPAMK	K	A	3.41	0.499	1.4	174	189	Q9H7Z7-189	1
JUL-2AB	PTGES2	Prostaglandin E synthase 2 (Membrane-associated prostaglandin E synthase-2) (mPGE synthase-2) (Microsomal prostaglandin E synthase 2) (mPGES-2) (Prostaglandin-H(2) E-isomerase) (EC 5.3.99.3) [Cleaved into: Prostaglandin E synthase 2 truncated form]	80142	Q9H7Z7	TPTEALASFDyIVR	R	E	4.28	0.459	2.49	253	263	Q9H7Z7-263	2
JUL-2AB	TIMMDC1	Complex I assembly factor TIMMDC1, mitochondrial (Protein M5-14) (Translocase of inner mitochondrial membrane domain-containing protein 1) (TIMM domain containing-protein 1)	51300	Q9NPL8	RLPyVPEPYYPESGWDR	K	L	4.12	0.49	2.08	41	44	Q9NPL8-44	5
JUL-2AB	STARD7	StAR-related lipid transfer protein 7, mitochondrial (Gestational trophoblastic tumor protein 1) (START domain-containing protein 7) (StARD7)	56910	Q9NQZ5	RPITGTHLyQYRVFGTYTDVTPR	R	Q	3.57	0.574	0	155	163	Q9NQZ5-163	1
JUL-2AB	STARD7	StAR-related lipid transfer protein 7, mitochondrial (Gestational trophoblastic tumor protein 1) (START domain-containing protein 7) (StARD7)	56910	Q9NQZ5	RPITGTHLYQyRVFGTYTDVTPR	R	Q	2.6	0.503	0.959	155	165	Q9NQZ5-165	1
JUL-2AB	DIABLO	Diablo homolog, mitochondrial (Direct IAP-binding protein with low pI) (Second mitochondria-derived activator of caspase) (Smac)	56616	Q9NR28	TQEEGEERAESEQEAyLRED	K	-	5	0.557	2.51	220	235	Q9NR28-235	14
JUL-2AB	OCIAD1	OCIA domain-containing protein 1 (Ovarian carcinoma immunoreactive antigen)	54940	Q9NX40	NRESyEVSLTQK	K	T	4.08	0.33	2.09	206	210	Q9NX40-210	1
JUL-2AB	CHCHD3	MICOS complex subunit MIC19 (Coiled-coil-helix-coiled-coil-helix domain-containing protein 3)	54927	Q9NX63	QDAFyKEQLAR	K	L	2.43	0.148	1.41	137	141	Q9NX63-141	1
JUL-2AB	CHCHD3	MICOS complex subunit MIC19 (Coiled-coil-helix-coiled-coil-helix domain-containing protein 3)	54927	Q9NX63	SSEFyRVTTEQYQK	R	A	4.13	0.472	0.721	152	156	Q9NX63-156	4
JUL-2AB	CHCHD3	MICOS complex subunit MIC19 (Coiled-coil-helix-coiled-coil-helix domain-containing protein 3)	54927	Q9NX63	FKRyESHPVcADLQAK	K	I	2.93	0.101	2.01	174	177	Q9NX63-177	4
JUL-2AB	CHCHD3	MICOS complex subunit MIC19 (Coiled-coil-helix-coiled-coil-helix domain-containing protein 3)	54927	Q9NX63	SQRySGAYGASVSDEELKR	K	R	4.91	0.528	2.37	46	49	Q9NX63-49	10
JUL-2AB	CHCHD3	MICOS complex subunit MIC19 (Coiled-coil-helix-coiled-coil-helix domain-containing protein 3)	54927	Q9NX63	YSGAyGASVSDEELK	R	R	4.53	0.654	5.8	49	53	Q9NX63-53	6
JUL-2AB	TIMM10B	Mitochondrial import inner membrane translocase subunit Tim10 B (Fracture callus protein 1) (FxC1) (Mitochondrial import inner membrane translocase subunit Tim9 B) (TIMM10B) (Tim10b)	26515	Q9Y5J6	RIADyEAASAVPGVAAEQPGVSPSGS	R	-	3.54	0.607	2.33	78	82	Q9Y5J6-82	5
JUL-2AB	TIMM13	Mitochondrial import inner membrane translocase subunit Tim13	26517	Q9Y5L4	cIAMcMDRyMDAWNTVSR	K	A	2.9	0.31	1.72	65	73	Q9Y5L4-73	1
JUL-2AB	TIMM13	Mitochondrial import inner membrane translocase subunit Tim13	26517	Q9Y5L4	YMDAWNTVSRAyNSR	R	L	2.48	0.428	1.89	73	84	Q9Y5L4-84	5

## Sheet: S1
Replicate	Gene Name	Gene Description	Entrez ID	UNIPROT ID	Peptide sequence	Previous amino acid	Next amino acid	SEQUEST XCorr score	SEQUEST DCn score	X! Tandem -log(e) score	Peptide START	Labeling site	UNIPROT-site	Unique Spectrum Count
APR-3AB	PDCD5	Programmed cell death protein 5 (TF-1 cell apoptosis-related protein 19) (Protein TFAR19)	9141	O14737	AVENyLIQMAR	K	Y	3.18	0.452	0.638	69	73	O14737-73	1
APR-3AB	UQCRQ	Cytochrome b-c1 complex subunit 8 (Complex III subunit 8) (Complex III subunit VIII) (Ubiquinol-cytochrome c reductase complex 9.5 kDa protein) (Ubiquinol-cytochrome c reductase complex ubiquinone-binding protein QP-C)	27089	O14949	NPAAyENDK	K	-	1.88	0.359	1.11	74	78	O14949-78	2
APR-3AB	SCO2	Protein SCO2 homolog, mitochondrial	9997	O43819	yVQDFHPR	R	L	2.66	0.451	0.538	180	180	O43819-180	4
APR-3AB	OPA1	Dynamin-like 120 kDa protein, mitochondrial (EC 3.6.5.5) (Optic atrophy protein 1) [Cleaved into: Dynamin-like 120 kDa protein, form S1]	4976	O60313-2	AAGQYSTSyAQQK	R	R	3.23	0.435	3.7	231	239	O60313-2-239	3
APR-3AB	TIMM17B	Mitochondrial import inner membrane translocase subunit Tim17-B	10245	O60830	DGTPAPGYPSyQQYH	K	-	2.29	0.554	0.959	158	168	O60830-168	7
APR-3AB	FLNB	Filamin-B (FLN-B) (ABP-278) (ABP-280 homolog) (Actin-binding-like protein) (Beta-filamin) (Filamin homolog 1) (Fh1) (Filamin-3) (Thyroid autoantigen) (Truncated actin-binding protein) (Truncated ABP)	2317	O75369	VTASGPGLSSyGVPASLPVDFAIDAR	K	D	2.61	0.438	1.89	1520	1530	O75369-1530	1
APR-3AB	SCO1	Protein SCO1 homolog, mitochondrial	6341	O75880	EAIANyVKEFSPK	K	L	3	0.38	2.12	211	216	O75880-216	11
APR-3AB	SCO1	Protein SCO1 homolog, mitochondrial	6341	O75880	EEVDQVARAyR	R	V	1.45	0.17	1.02	232	241	O75880-241	1
APR-3AB	SCO1	Protein SCO1 homolog, mitochondrial	6341	O75880	AYRVyYSPGPK	R	D	2.79	0.466	4.52	240	244	O75880-244	6
APR-3AB	SCO1	Protein SCO1 homolog, mitochondrial	6341	O75880	KGEIAASIATHMRPyR	R	K	2.8	0.239	0.523	283	297	O75880-297	7
APR-3AB	AIFM1	Apoptosis-inducing factor 1, mitochondrial (EC 1.1.1.-) (Programmed cell death protein 8)	9131	O95831	ILPEyLSNWTMEK	K	V	3.32	0.485	4.15	343	347	O95831-347	2
APR-3AB	AIFM1	Apoptosis-inducing factor 1, mitochondrial (EC 1.1.1.-) (Programmed cell death protein 8)	9131	O95831	SNIWVAGDAAcFyDIK	R	L	3.09	0.616	5.03	431	443	O95831-443	1
APR-3AB	NDUFB10	NADH dehydrogenase [ubiquinone] 1 beta subcomplex subunit 10 (Complex I-PDSW) (CI-PDSW) (NADH-ubiquinone oxidoreductase PDSW subunit)	4716	O96000	EGQNyQQNcIK	R	E	1.57	0.125	2.49	111	115	O96000-115	1
APR-3AB	NDUFB10	NADH dehydrogenase [ubiquinone] 1 beta subcomplex subunit 10 (Complex I-PDSW) (CI-PDSW) (NADH-ubiquinone oxidoreductase PDSW subunit)	4716	O96000	AYQDRyQDLGAYSSAR	K	K	3.34	0.441	2.38	132	137	O96000-137	1
APR-3AB	NDUFB10	NADH dehydrogenase [ubiquinone] 1 beta subcomplex subunit 10 (Complex I-PDSW) (CI-PDSW) (NADH-ubiquinone oxidoreductase PDSW subunit)	4716	O96000	YQDLGAySSAR	R	K	2.82	0.584	3.19	137	143	O96000-143	1
APR-3AB	NDUFB10	NADH dehydrogenase [ubiquinone] 1 beta subcomplex subunit 10 (Complex I-PDSW) (CI-PDSW) (NADH-ubiquinone oxidoreductase PDSW subunit)	4716	O96000	NRYyYYHR	K	Q	2.24	0.517	0.638	53	56	O96000-56	1
APR-3AB	ALDOA	Fructose-bisphosphate aldolase A (EC 4.1.2.13) (Lung cancer antigen NY-LU-1) (Muscle-type aldolase)	226	P04075	YTPSGQAGAAASESLFVSNHAy	K	-	4.32	0.626	7.26	343	364	P04075-364	8
APR-3AB	PFN1	Profilin-1 (Epididymis tissue protein Li 184a) (Profilin I)	5216	P07737	SSFyVNGLTLGGQK	R	C	3.87	0.49	1.96	57	60	P07737-60	4
APR-3AB	HSP90AA1	Heat shock protein HSP 90-alpha (Heat shock 86 kDa) (HSP 86) (HSP86) (Lipopolysaccharide-associated protein 2) (LAP-2) (LPS-associated protein 2) (Renal carcinoma antigen NY-REN-38)	3320	P07900	LVTSPccIVTSTyGWTANMER	R	I	2.99	0.473	1.17	592	604	P07900-604	2
APR-3AB	HSP90AA1	Heat shock protein HSP 90-alpha (Heat shock 86 kDa) (HSP 86) (HSP86) (Lipopolysaccharide-associated protein 2) (LAP-2) (LPS-associated protein 2) (Renal carcinoma antigen NY-REN-38)	3320	P07900	DNSTMGyMAAK	R	K	2.59	0.425	0	621	627	P07900-627	3
APR-3AB	HSP90AB1	Heat shock protein HSP 90-beta (HSP 90) (Heat shock 84 kDa) (HSP 84) (HSP84)	3326	P08238	LVSSPccIVTSTyGWTANMER	R	I	3.1	0.487	0	584	596	P08238-596	1
APR-3AB	HSP90AB1	Heat shock protein HSP 90-beta (HSP 90) (Heat shock 84 kDa) (HSP 84) (HSP84)	3326	P08238	DNSTMGyMMAK	R	K	1.74	0.251	4.35	613	619	P08238-619	1
APR-3AB	CYC1	Cytochrome c1, heme protein, mitochondrial (Complex III subunit 4) (Complex III subunit IV) (Cytochrome b-c1 complex subunit 4) (Ubiquinol-cytochrome-c reductase complex cytochrome c1 subunit) (Cytochrome c-1)	1537	P08574	HLVGVcyTEDEAK	R	E	2.59	0.555	1.26	134	140	P08574-140	3
APR-3AB	CYC1	Cytochrome c1, heme protein, mitochondrial (Complex III subunit 4) (Complex III subunit IV) (Cytochrome b-c1 complex subunit 4) (Ubiquinol-cytochrome-c reductase complex cytochrome c1 subunit) (Cytochrome c-1)	1537	P08574	LFDyFPKPYPNSEAAR	K	A	3.1	0.524	1.49	171	174	P08574-174	7
APR-3AB	HNRNPA1	Heterogeneous nuclear ribonucleoprotein A1 (hnRNP A1) (Helix-destabilizing protein) (Single-strand RNA-binding protein) (hnRNP core protein A1) [Cleaved into: Heterogeneous nuclear ribonucleoprotein A1, N-terminally processed]	3178	P09651	NQGGyGGSSSSSSYGSGR	R	R	3.81	0.576	6.64	353	357	P09651-357	4
APR-3AB	HNRNPA1	Heterogeneous nuclear ribonucleoprotein A1 (hnRNP A1) (Helix-destabilizing protein) (Single-strand RNA-binding protein) (hnRNP core protein A1) [Cleaved into: Heterogeneous nuclear ribonucleoprotein A1, N-terminally processed]	3178	P09651	NQGGYGGSSSSSSyGSGR	R	R	2.85	0.546	0.796	353	366	P09651-366	4
APR-3AB	HSPA1A	Heat shock 70 kDa protein 1A (Heat shock 70 kDa protein 1) (HSP70-1) (HSP70.1)	3303	P0DMV8	ELEQVcNPIISGLyQGAGGPGPGGFGAQGPK	K	G	5.06	0.512	4.03	598	611	P0DMV8-611	2
APR-3AB	CKMT1A	Creatine kinase U-type, mitochondrial (EC 2.7.3.2) (Acidic-type mitochondrial creatine kinase) (Mia-CK) (Ubiquitous mitochondrial creatine kinase) (U-MtCK)	1159	P12532	LGyILTcPSNLGTGLR	R	A	4.23	0.643	7.12	310	312	P12532-312	5
APR-3AB	COX4I1	Cytochrome c oxidase subunit 4 isoform 1, mitochondrial (Cytochrome c oxidase polypeptide IV) (Cytochrome c oxidase subunit IV isoform 1) (COX IV-1)	1327	P13073	HYVyGPLPQSFDKEWVAK	K	Q	3.18	0.35	1.06	123	126	P13073-126	2
APR-3AB	PKM	Pyruvate kinase PKM (EC 2.7.1.40) (Cytosolic thyroid hormone-binding protein) (CTHBP) (Opa-interacting protein 3) (OIP-3) (Pyruvate kinase 2/3) (Pyruvate kinase muscle isozyme) (Thyroid hormone-binding protein 1) (THBP1) (Tumor M2-PK) (p58)	5315	P14618	LNFSHGTHEyHAETIK	R	N	2.2	0.314	1.09	74	83	P14618-83	1
APR-3AB	COX6B1	Cytochrome c oxidase subunit 6B1 (Cytochrome c oxidase subunit VIb isoform 1) (COX VIb-1)	1340	P14854	IKNyKTAPFDSR	K	F	2.73	0.419	0	9	12	P14854-12	2
APR-3AB	COX6B1	Cytochrome c oxidase subunit 6B1 (Cytochrome c oxidase subunit VIb isoform 1) (COX VIb-1)	1340	P14854	NcWQNyLDFHR	R	C	2.12	0.257	0.523	29	34	P14854-34	1
APR-3AB	COX6B1	Cytochrome c oxidase subunit 6B1 (Cytochrome c oxidase subunit VIb isoform 1) (COX VIb-1)	1340	P14854	GGDISVcEWyQR	K	V	2.53	0.512	1.62	48	57	P14854-57	1
APR-3AB	VDAC1	Voltage-dependent anion-selective channel protein 1 (VDAC-1) (hVDAC1) (Outer mitochondrial membrane protein porin 1) (Plasmalemmal porin) (Porin 31HL) (Porin 31HM)	7416	P21796	WTEyGLTFTEK	R	W	3.54	0.599	2.1	64	67	P21796-67	5
APR-3AB	HNRNPA2B1	Heterogeneous nuclear ribonucleoproteins A2/B1 (hnRNP A2/B1)	3181	P22626	NMGGPyGGGNYGPGGSGGSGGYGGR	R	S	2.51	0.482	4.55	326	331	P22626-331	1
APR-3AB	HNRNPA2B1	Heterogeneous nuclear ribonucleoproteins A2/B1 (hnRNP A2/B1)	3181	P22626	NMGGPYGGGNyGPGGSGGSGGYGGR	R	S	2.62	0.636	2.3	326	336	P22626-336	3
APR-3AB	HNRNPA2B1	Heterogeneous nuclear ribonucleoproteins A2/B1 (hnRNP A2/B1)	3181	P22626	NMGGPYGGGNYGPGGSGGSGGyGGR	R	S	2.92	0.485	1.17	326	347	P22626-347	1
APR-3AB	EEF1D	Elongation factor 1-delta (EF-1-delta) (Antigen NY-CO-4)	1936	P29692	LVPVGyGIR	K	K	2.31	0.485	1.38	233	238	P29692-238	2
APR-3AB	PHB	Prohibitin	5245	P35232	KLEAAEDIAyQLSR	R	S	5.02	0.63	3.68	240	249	P35232-249	5
APR-3AB	TAGLN2	Transgelin-2 (Epididymis tissue protein Li 7e) (SM22-alpha homolog)	8407	P37802	GASQAGMTGyGMPR	R	Q	3.49	0.549	7.8	183	192	P37802-192	8
APR-3AB	TAGLN2	Transgelin-2 (Epididymis tissue protein Li 7e) (SM22-alpha homolog)	8407	P37802	GPAyGLSR	R	E	2.82	0.392	3.19	5	8	P37802-8	2
APR-3AB	NDUFA8	NADH dehydrogenase [ubiquinone] 1 alpha subcomplex subunit 8 (Complex I-19kD) (CI-19kD) (Complex I-PGIV) (CI-PGIV) (NADH-ubiquinone oxidoreductase 19 kDa subunit)	4702	P51970	HcAEPFTEYWTcIDyTGQQLFR	R	H	4.34	0.638	4.96	77	91	P51970-91	3
APR-3AB	HCCS	Cytochrome c-type heme lyase (CCHL) (EC 4.4.1.17) (Holocytochrome c-type synthase)	3052	P53701	KTySVPAHQER	K	A	2.66	0.344	3.39	49	51	P53701-51	2
APR-3AB	HCCS	Cytochrome c-type heme lyase (CCHL) (EC 4.4.1.17) (Holocytochrome c-type synthase)	3052	P53701	AyEYVEcPIR	R	G	2.2	0.361	3.7	60	61	P53701-61	1
APR-3AB	HCCS	Cytochrome c-type heme lyase (CCHL) (EC 4.4.1.17) (Holocytochrome c-type synthase)	3052	P53701	AYEyVEcPIR	R	G	2.36	0.444	2.41	60	63	P53701-63	2
APR-3AB	ROMO1	Reactive oxygen species modulator 1 (ROS modulator 1) (Epididymis tissue protein Li 175) (Glyrichin) (Mitochondrial targeting GxxxG motif protein) (MTGM) (Protein MGR2 homolog)	140823	P60602	pVAVGPyGQSQPScFDR	M	V	0	0	2.01	2	8	P60602-8	1
APR-3AB	ACTB	Actin, cytoplasmic 1 (Beta-actin) [Cleaved into: Actin, cytoplasmic 1, N-terminally processed]	60	P60709	TTGIVMDSGDGVTHTVPIyEGYALPHAILR	R	L	4.32	0.407	4.33	148	166	P60709-166	11
APR-3AB	ACTB	Actin, cytoplasmic 1 (Beta-actin) [Cleaved into: Actin, cytoplasmic 1, N-terminally processed]	60	P60709	TTGIVMDSGDGVTHTVPIYEGyALPHAILR	R	L	4.93	0.568	7.7	148	169	P60709-169	11
APR-3AB	ACTB	Actin, cytoplasmic 1 (Beta-actin) [Cleaved into: Actin, cytoplasmic 1, N-terminally processed]	60	P60709	ILTERGySFTTTAER	K	E	3.33	0.605	1.92	192	198	P60709-198	5
APR-3AB	ACTB	Actin, cytoplasmic 1 (Beta-actin) [Cleaved into: Actin, cytoplasmic 1, N-terminally processed]	60	P60709	IWHHTFyNELR	K	V	3.04	0.41	1.31	85	91	P60709-91	4
APR-3AB	RPS3A	40S ribosomal protein S3a (v-fos transformation effector protein) (Fte-1)	6189	P61247	VERADGyEPPVQESV	K	-	2.68	0.536	3.17	250	256	P61247-256	4
APR-3AB	CNBP	Cellular nucleic acid-binding protein (CNBP) (Zinc finger protein 9)	7555	P62633	TSEVNcyRcGESGHLAR	K	E	2.11	0.428	1	153	159	P62633-159	1
APR-3AB	EIF5A	Eukaryotic translation initiation factor 5A-1 (eIF-5A-1) (eIF-5A1) (Eukaryotic initiation factor 5A isoform 1) (eIF-5A) (Rev-binding factor) (eIF-4D)	1984	P63241	RNDFQLIGIQDGyLSLLQDSGEVR	K	E	3.37	0.404	3.33	86	98	P63241-98	1
APR-3AB	YBX1	Nuclease-sensitive element-binding protein 1 (CCAAT-binding transcription factor I subunit A) (CBF-A) (DNA-binding protein B) (DBPB) (Enhancer factor I subunit A) (EFI-A) (Y-box transcription factor) (Y-box-binding protein 1) (YB-1)	4904	P67809	NYQQNyQNSESGEKNEGSESAPEGQAQQR	R	R	4.8	0.675	4.31	157	162	P67809-162	3
APR-3AB	YBX1	Nuclease-sensitive element-binding protein 1 (CCAAT-binding transcription factor I subunit A) (CBF-A) (DNA-binding protein B) (DBPB) (Enhancer factor I subunit A) (EFI-A) (Y-box transcription factor) (Y-box-binding protein 1) (YB-1)	4904	P67809	RPQySNPPVQGEVMEGADNQGAGEQGRPVR	R	Q	3.46	0.501	0	205	208	P67809-208	4
APR-3AB	EEF1A1	Elongation factor 1-alpha 1 (EF-1-alpha-1) (Elongation factor Tu) (EF-Tu) (Eukaryotic elongation factor 1 A-1) (eEF1A-1) (Leukocyte receptor cluster member 7)	1915	P68104	EHALLAyTLGVK	R	Q	3.38	0.534	4.39	135	141	P68104-141	2
APR-3AB	EEF1A1	Elongation factor 1-alpha 1 (EF-1-alpha-1) (Elongation factor Tu) (EF-Tu) (Eukaryotic elongation factor 1 A-1) (eEF1A-1) (Leukocyte receptor cluster member 7)	1915	P68104	LPLQDVyKIGGIGTVPVGR	R	V	2.71	0.432	0.959	248	254	P68104-254	1
APR-3AB	TUBA1B	Tubulin alpha-1B chain (Alpha-tubulin ubiquitous) (Tubulin K-alpha-1) (Tubulin alpha-ubiquitous chain)	10376	P68363	VGINyQPPTVVPGGDLAK	K	V	3.28	0.531	2.38	353	357	P68363-357	3
APR-3AB	CYCS	Cytochrome c	54205	P99999	TGQAPGYSyTAANK	K	N	3.05	0.652	2.92	41	49	P99999-49	2
APR-3AB	SSBP1	Single-stranded DNA-binding protein, mitochondrial (Mt-SSB) (MtSSB) (PWP1-interacting protein 17)	6742	Q04837	SGDSEVyQLGDVSQK	R	T	3.03	0.456	2.19	67	73	Q04837-73	1
APR-3AB	CTTN	Src substrate cortactin (Amplaxin) (Oncogene EMS1)	2017	Q14247	LPSSPVyEDAASFK	R	A	1.92	0.315	2.17	415	421	Q14247-421	1
APR-3AB	CTTN	Src substrate cortactin (Amplaxin) (Oncogene EMS1)	2017	Q14247	AELSyRGPVSGTEPEPVYSMEAADYR	K	E	4.03	0.549	7.77	429	433	Q14247-433	1
APR-3AB	CYP51A1	Lanosterol 14-alpha demethylase (LDM) (EC 1.14.13.70) (CYPLI) (Cytochrome P450 51A1) (Cytochrome P450-14DM) (Cytochrome P45014DM) (Cytochrome P450LI) (Sterol 14-alpha demethylase)	1595	Q16850	TFTyLLGSDAAALLFNSK	K	N	3.53	0.468	0	104	107	Q16850-107	1
APR-3AB	CYP51A1	Lanosterol 14-alpha demethylase (LDM) (EC 1.14.13.70) (CYPLI) (Cytochrome P450 51A1) (Cytochrome P450-14DM) (Cytochrome P45014DM) (Cytochrome P450LI) (Sterol 14-alpha demethylase)	1595	Q16850	NEDLNAEDVySR	K	L	3.46	0.476	4.85	122	131	Q16850-131	12
APR-3AB	CYP51A1	Lanosterol 14-alpha demethylase (LDM) (EC 1.14.13.70) (CYPLI) (Cytochrome P450 51A1) (Cytochrome P450-14DM) (Cytochrome P45014DM) (Cytochrome P450LI) (Sterol 14-alpha demethylase)	1595	Q16850	GVAyDVPNPVFLEQK	K	K	3.72	0.52	7.85	142	145	Q16850-145	1
APR-3AB	IMMT	MICOS complex subunit MIC60 (Cell proliferation-inducing gene 4/52 protein) (Mitochondrial inner membrane protein) (Mitofilin) (p87/89)	10989	Q16891	VVSQyHELVVQAR	K	D	3.62	0.486	2.43	354	358	Q16891-358	7
APR-3AB	IMMT	MICOS complex subunit MIC60 (Cell proliferation-inducing gene 4/52 protein) (Mitochondrial inner membrane protein) (Mitofilin) (p87/89)	10989	Q16891	RLSQEQVDNFTLDINTAyAR	R	L	0	0	1.46	526	543	Q16891-543	1
APR-3AB	IMMT	MICOS complex subunit MIC60 (Cell proliferation-inducing gene 4/52 protein) (Mitochondrial inner membrane protein) (Mitofilin) (p87/89)	10989	Q16891	LFEMVLGPAAyNVPLPK	K	K	3.64	0.691	6.1	85	95	Q16891-95	7
APR-3AB	TIMM50	Mitochondrial import inner membrane translocase subunit TIM50	92609	Q3ZCQ8	TVLEHyALEDDPLAAFK	R	Q	3.29	0.599	4.8	296	301	Q3ZCQ8-301	6
APR-3AB	CCSMST1	Protein CCSMST1	283951	Q4G0I0	QVWGEVPEPSDRSEEPETPAAyR	R	A	3.22	0.491	2.31	107	128	Q4G0I0-128	9
APR-3AB	AGK	Acylglycerol kinase, mitochondrial (hAGK) (EC 2.7.1.107) (EC 2.7.1.94) (Multiple substrate lipid kinase) (HsMuLK) (MuLK) (Multi-substrate lipid kinase)	55750	Q53H12	LASyWAQPQDALSQEVSPEVWK	R	D	3.58	0.385	1.4	283	286	Q53H12-286	2
APR-3AB	TTC19	Tetratricopeptide repeat protein 19, mitochondrial (TPR repeat protein 19)	54902	Q6DKK2	LASIyAAQNR	K	Q	3.32	0.394	3.38	185	189	Q6DKK2-189	2
APR-3AB	PPP1R14B	Protein phosphatase 1 regulatory subunit 14B (Phospholipase C-beta-3 neighbouring gene protein)	26472	Q96C90	VyFQSPPGAAGEGPGGADDEGPVRR	R	Q	2.76	0.476	1.77	28	29	Q96C90-29	1
APR-3AB	PHB2	Prohibitin-2 (B-cell receptor-associated protein BAP37) (D-prohibitin) (Repressor of estrogen receptor activity)	11331	Q99623	VLSRPNAQELPSMyQR	R	L	2.87	0.252	0.824	108	121	Q99623-121	3
APR-3AB	PHB2	Prohibitin-2 (B-cell receptor-associated protein BAP37) (D-prohibitin) (Repressor of estrogen receptor activity)	11331	Q99623	LLLGAGAVAyGVR	K	E	3.63	0.593	4.64	25	34	Q99623-34	1
APR-3AB	APOO	MICOS complex subunit MIC26 (Apolipoprotein O) (MICOS complex subunit MIC23) (Protein FAM121B)	79135	Q9BUR5	VDELSLYSVPEGQSKyVEEAR	K	S	2.6	0.31	0.77	37	52	Q9BUR5-52	1
APR-3AB	CLPB	Caseinolytic peptidase B protein homolog (EC 3.6.1.3) (Suppressor of potassium transport defect 3)	81570	Q9H078	FIGSPPGyVGHEEGGQLTK	K	K	1.95	0.235	0.921	423	430	Q9H078-430	1
APR-3AB	CLPB	Caseinolytic peptidase B protein homolog (EC 3.6.1.3) (Suppressor of potassium transport defect 3)	81570	Q9H078	EVADVLVDGYNVHyGAR	R	S	1.36	0	0.523	604	617	Q9H078-617	1
APR-3AB	GHITM	Growth hormone-inducible transmembrane protein (Dermal papilla-derived protein 2) (Mitochondrial morphology and cristae structure 1) (MICS1) (Transmembrane BAX inhibitor motif-containing protein 5)	27069	Q9H3K2	RAEVSPMyGVQK	K	Y	3.29	0.43	1.12	301	308	Q9H3K2-308	8
APR-3AB	PTGES2	Prostaglandin E synthase 2 (Membrane-associated prostaglandin E synthase-2) (mPGE synthase-2) (Microsomal prostaglandin E synthase 2) (mPGES-2) (Prostaglandin-H(2) E-isomerase) (EC 5.3.99.3) [Cleaved into: Prostaglandin E synthase 2 truncated form]	80142	Q9H7Z7	TYLVSGQPLEEIITyYPAMK	K	A	3.66	0.537	1	174	188	Q9H7Z7-188	3
APR-3AB	PTGES2	Prostaglandin E synthase 2 (Membrane-associated prostaglandin E synthase-2) (mPGE synthase-2) (Microsomal prostaglandin E synthase 2) (mPGES-2) (Prostaglandin-H(2) E-isomerase) (EC 5.3.99.3) [Cleaved into: Prostaglandin E synthase 2 truncated form]	80142	Q9H7Z7	TYLVSGQPLEEIITYyPAMK	K	A	4.46	0.668	3.12	174	189	Q9H7Z7-189	3
APR-3AB	TIMMDC1	Complex I assembly factor TIMMDC1, mitochondrial (Protein M5-14) (Translocase of inner mitochondrial membrane domain-containing protein 1) (TIMM domain containing-protein 1)	51300	Q9NPL8	RLPyVPEPYYPESGWDR	K	L	2.89	0.522	1.82	41	44	Q9NPL8-44	8
APR-3AB	DIABLO	Diablo homolog, mitochondrial (Direct IAP-binding protein with low pI) (Second mitochondria-derived activator of caspase) (Smac)	56616	Q9NR28	AVyTLTSLYR	K	Q	2.77	0.388	0.854	106	108	Q9NR28-108	1
APR-3AB	DIABLO	Diablo homolog, mitochondrial (Direct IAP-binding protein with low pI) (Second mitochondria-derived activator of caspase) (Smac)	56616	Q9NR28	AVYTLTSLyRQYTSLLGK	K	M	2.35	0.538	0.959	106	114	Q9NR28-114	2
APR-3AB	DIABLO	Diablo homolog, mitochondrial (Direct IAP-binding protein with low pI) (Second mitochondria-derived activator of caspase) (Smac)	56616	Q9NR28	TQEEGEERAESEQEAyLRED	K	-	3.95	0.526	5.43	220	235	Q9NR28-235	15
APR-3AB	OCIAD1	OCIA domain-containing protein 1 (Ovarian carcinoma immunoreactive antigen)	54940	Q9NX40	NITyEELR	K	N	2.47	0.34	0.658	196	199	Q9NX40-199	2
APR-3AB	OCIAD1	OCIA domain-containing protein 1 (Ovarian carcinoma immunoreactive antigen)	54940	Q9NX40	NRESyEVSLTQK	K	T	3.21	0.488	0	206	210	Q9NX40-210	5
APR-3AB	OCIAD1	OCIA domain-containing protein 1 (Ovarian carcinoma immunoreactive antigen)	54940	Q9NX40	VNKyGDTWDE	K	-	2.26	0.504	0	236	239	Q9NX40-239	2
APR-3AB	CHCHD3	MICOS complex subunit MIC19 (Coiled-coil-helix-coiled-coil-helix domain-containing protein 3)	54927	Q9NX63	SSEFyRVTTEQYQK	R	A	3.51	0.534	3.55	152	156	Q9NX63-156	5
APR-3AB	CHCHD3	MICOS complex subunit MIC19 (Coiled-coil-helix-coiled-coil-helix domain-containing protein 3)	54927	Q9NX63	VTTEQyQKAAEEVEAK	R	F	3.83	0.554	7.32	158	163	Q9NX63-163	2
APR-3AB	CHCHD3	MICOS complex subunit MIC19 (Coiled-coil-helix-coiled-coil-helix domain-containing protein 3)	54927	Q9NX63	FKRyESHPVcADLQAK	K	I	2.82	0.437	0	174	177	Q9NX63-177	1
APR-3AB	CHCHD3	MICOS complex subunit MIC19 (Coiled-coil-helix-coiled-coil-helix domain-containing protein 3)	54927	Q9NX63	SQRySGAYGASVSDEELK	K	R	4.33	0.677	1.92	46	49	Q9NX63-49	10
APR-3AB	CHCHD3	MICOS complex subunit MIC19 (Coiled-coil-helix-coiled-coil-helix domain-containing protein 3)	54927	Q9NX63	YSGAyGASVSDEELK	R	R	3.86	0.594	6.24	49	53	Q9NX63-53	11
APR-3AB	TIMM10B	Mitochondrial import inner membrane translocase subunit Tim10 B (Fracture callus protein 1) (FxC1) (Mitochondrial import inner membrane translocase subunit Tim9 B) (TIMM10B) (Tim10b)	26515	Q9Y5J6	LMAAyVQLMPALVQR	R	R	2.8	0.473	0	63	67	Q9Y5J6-67	1
APR-3AB	TIMM10B	Mitochondrial import inner membrane translocase subunit Tim10 B (Fracture callus protein 1) (FxC1) (Mitochondrial import inner membrane translocase subunit Tim9 B) (TIMM10B) (Tim10b)	26515	Q9Y5J6	RIADyEAASAVPGVAAEQPGVSPSGS	R	-	3.69	0.573	3.8	78	82	Q9Y5J6-82	7
APR-3AB	TIMM13	Mitochondrial import inner membrane translocase subunit Tim13	26517	Q9Y5L4	cIAMcMDRyMDAWNTVSR	K	A	2.45	0.418	0.886	65	73	Q9Y5L4-73	1
APR-3AB	TIMM13	Mitochondrial import inner membrane translocase subunit Tim13	26517	Q9Y5L4	YMDAWNTVSRAyNSR	R	L	2.68	0.598	3.12	73	84	Q9Y5L4-84	6

## Sheet: S2
Replicate	Gene Name	Gene Description	Entrez ID	UNIPROT ID	Peptide sequence	Previous amino acid	Next amino acid	SEQUEST XCorr score	SEQUEST DCn score	X! Tandem -log(e) score	Peptide START	Labeling site	UNIPROT-site	Unique Spectrum Count
Jun-3AB	NDUFA4	Cytochrome c oxidase subunit NDUFA4 (Complex I-MLRQ) (CI-MLRQ) (NADH-ubiquinone oxidoreductase MLRQ subunit)	4697	O00483	FYSVNVDySK	K	L	1.87	0.185	1.17	64	71	O00483-71	1
Jun-3AB	UQCRQ	Cytochrome b-c1 complex subunit 8 (Complex III subunit 8) (Complex III subunit VIII) (Ubiquinol-cytochrome c reductase complex 9.5 kDa protein) (Ubiquinol-cytochrome c reductase complex ubiquinone-binding protein QP-C)	27089	O14949	NPAAyENDK	K	-	2.84	0.389	0	74	78	O14949-78	2
Jun-3AB	HTRA2	Serine protease HTRA2, mitochondrial (EC 3.4.21.108) (High temperature requirement protein A2) (HtrA2) (Omi stress-regulated endoprotease) (Serine protease 25) (Serine proteinase OMI)	27429	O43464	SQyNFIADVVEK	R	T	3.02	0.396	4.37	145	147	O43464-147	1
Jun-3AB	SCO2	Protein SCO2 homolog, mitochondrial	9997	O43819	yVQDFHPR	R	L	2.82	0.409	1.74	180	180	O43819-180	1
Jun-3AB	TIMM17B	Mitochondrial import inner membrane translocase subunit Tim17-B	10245	O60830	DGTPAPGyPSYQQYH	K	-	2.53	0.52	2.55	158	165	O60830-165	1
Jun-3AB	SCO1	Protein SCO1 homolog, mitochondrial	6341	O75880	EAIANyVK	K	E	1.91	0.238	3.89	211	216	O75880-216	6
Jun-3AB	SCO1	Protein SCO1 homolog, mitochondrial	6341	O75880	AYRVyYSPGPK	R	D	3.59	0.327	0.745	240	244	O75880-244	4
Jun-3AB	SCO1	Protein SCO1 homolog, mitochondrial	6341	O75880	KGEIAASIATHMRPyR	R	K	2.69	0.34	4.52	283	297	O75880-297	4
Jun-3AB	NDUFB10	NADH dehydrogenase [ubiquinone] 1 beta subcomplex subunit 10 (Complex I-PDSW) (CI-PDSW) (NADH-ubiquinone oxidoreductase PDSW subunit)	4716	O96000	EGQNyQQNcIK	R	E	2.63	0.304	1.22	111	115	O96000-115	2
Jun-3AB	NDUFB10	NADH dehydrogenase [ubiquinone] 1 beta subcomplex subunit 10 (Complex I-PDSW) (CI-PDSW) (NADH-ubiquinone oxidoreductase PDSW subunit)	4716	O96000	AyQDRYQDLGAYSSAR	K	K	2.81	0.103	2.36	132	133	O96000-133	1
Jun-3AB	NDUFB10	NADH dehydrogenase [ubiquinone] 1 beta subcomplex subunit 10 (Complex I-PDSW) (CI-PDSW) (NADH-ubiquinone oxidoreductase PDSW subunit)	4716	O96000	YQDLGAySSAR	R	K	2.88	0.498	3.19	137	143	O96000-143	5
Jun-3AB	NDUFB10	NADH dehydrogenase [ubiquinone] 1 beta subcomplex subunit 10 (Complex I-PDSW) (CI-PDSW) (NADH-ubiquinone oxidoreductase PDSW subunit)	4716	O96000	NRyYYYHR	K	Q	2.37	0.421	0.569	53	55	O96000-55	1
Jun-3AB	NDUFB10	NADH dehydrogenase [ubiquinone] 1 beta subcomplex subunit 10 (Complex I-PDSW) (CI-PDSW) (NADH-ubiquinone oxidoreductase PDSW subunit)	4716	O96000	NRYYyYHR	K	Q	2.6	0.315	0.523	53	57	O96000-57	1
Jun-3AB	ALDOA	Fructose-bisphosphate aldolase A (EC 4.1.2.13) (Lung cancer antigen NY-LU-1) (Muscle-type aldolase)	226	P04075	YTPSGQAGAAASESLFVSNHAy	K	-	5.05	0.746	19.1	343	364	P04075-364	7
Jun-3AB	PFN1	Profilin-1 (Epididymis tissue protein Li 184a) (Profilin I)	5216	P07737	SSFyVNGLTLGGQK	R	C	2.49	0.399	1.28	57	60	P07737-60	2
Jun-3AB	HSP90AA1	Heat shock protein HSP 90-alpha (Heat shock 86 kDa) (HSP 86) (HSP86) (Lipopolysaccharide-associated protein 2) (LAP-2) (LPS-associated protein 2) (Renal carcinoma antigen NY-REN-38)	3320	P07900	DNSTMGyMAAK	R	K	2.9	0.403	1.39	621	627	P07900-627	2
Jun-3AB	CYC1	Cytochrome c1, heme protein, mitochondrial (Complex III subunit 4) (Complex III subunit IV) (Cytochrome b-c1 complex subunit 4) (Ubiquinol-cytochrome-c reductase complex cytochrome c1 subunit) (Cytochrome c-1)	1537	P08574	LFDyFPKPYPNSEAAR	K	A	2.27	0.138	1.66	171	174	P08574-174	4
Jun-3AB	HNRNPA1	Heterogeneous nuclear ribonucleoprotein A1 (hnRNP A1) (Helix-destabilizing protein) (Single-strand RNA-binding protein) (hnRNP core protein A1) [Cleaved into: Heterogeneous nuclear ribonucleoprotein A1, N-terminally processed]	3178	P09651	SSGPyGGGGQYFAKPR	R	N	2.94	0.402	4.1	337	341	P09651-341	2
Jun-3AB	HNRNPA1	Heterogeneous nuclear ribonucleoprotein A1 (hnRNP A1) (Helix-destabilizing protein) (Single-strand RNA-binding protein) (hnRNP core protein A1) [Cleaved into: Heterogeneous nuclear ribonucleoprotein A1, N-terminally processed]	3178	P09651	NQGGyGGSSSSSSYGSGR	R	R	4.03	0.479	1.41	353	357	P09651-357	5
Jun-3AB	HNRNPA1	Heterogeneous nuclear ribonucleoprotein A1 (hnRNP A1) (Helix-destabilizing protein) (Single-strand RNA-binding protein) (hnRNP core protein A1) [Cleaved into: Heterogeneous nuclear ribonucleoprotein A1, N-terminally processed]	3178	P09651	NQGGYGGSSSSSSyGSGR	R	R	3.83	0.671	6.21	353	366	P09651-366	3
Jun-3AB	HSPA1A	Heat shock 70 kDa protein 1A (Heat shock 70 kDa protein 1) (HSP70-1) (HSP70.1)	3303	P0DMV8	ELEQVcNPIISGLyQGAGGPGPGGFGAQGPK	K	G	3.46	0.436	3.44	598	611	P0DMV8-611	1
Jun-3AB	CKMT1A	Creatine kinase U-type, mitochondrial (EC 2.7.3.2) (Acidic-type mitochondrial creatine kinase) (Mia-CK) (Ubiquitous mitochondrial creatine kinase) (U-MtCK)	1159	P12532	SGyFDER	R	Y	2.8	0.308	2.35	151	153	P12532-153	2
Jun-3AB	CKMT1A	Creatine kinase U-type, mitochondrial (EC 2.7.3.2) (Acidic-type mitochondrial creatine kinase) (Mia-CK) (Ubiquitous mitochondrial creatine kinase) (U-MtCK)	1159	P12532	LGyILTcPSNLGTGLR	R	A	4.4	0.661	5.39	310	312	P12532-312	3
Jun-3AB	HNRNPL	Heterogeneous nuclear ribonucleoprotein L (hnRNP L)	3191	P14866	MAAAGGGGGGGRYyGGGSEGGR	K	A	3.01	0.463	0.678	35	48	P14866-48	1
Jun-3AB	H2AFX	Histone H2AX (H2a/x) (Histone H2A.X)	3014	P16104	ATQASQEy	K	-	2.58	0.426	1.55	136	143	P16104-143	3
Jun-3AB	VDAC1	Voltage-dependent anion-selective channel protein 1 (VDAC-1) (hVDAC1) (Outer mitochondrial membrane protein porin 1) (Plasmalemmal porin) (Porin 31HL) (Porin 31HM)	7416	P21796	VTQSNFAVGyK	R	T	2.02	0.0485	2.52	164	173	P21796-173	1
Jun-3AB	VDAC1	Voltage-dependent anion-selective channel protein 1 (VDAC-1) (hVDAC1) (Outer mitochondrial membrane protein porin 1) (Plasmalemmal porin) (Porin 31HL) (Porin 31HM)	7416	P21796	YRWTEyGLTFTEK	K	W	3.61	0.387	2.57	62	67	P21796-67	7
Jun-3AB	HNRNPA2B1	Heterogeneous nuclear ribonucleoproteins A2/B1 (hnRNP A2/B1)	3181	P22626	GGSDGyGSGR	R	G	2.33	0.39	1.15	229	234	P22626-234	3
Jun-3AB	HNRNPA2B1	Heterogeneous nuclear ribonucleoproteins A2/B1 (hnRNP A2/B1)	3181	P22626	NMGGPyGGGNYGPGGSGGSGGYGGR	R	S	4.86	0.554	7.55	326	331	P22626-331	2
Jun-3AB	HNRNPA2B1	Heterogeneous nuclear ribonucleoproteins A2/B1 (hnRNP A2/B1)	3181	P22626	NMGGPYGGGNYGPGGSGGSGGyGGR	R	S	4.95	0.598	5.11	326	347	P22626-347	7
Jun-3AB	EEF1D	Elongation factor 1-delta (EF-1-delta) (Antigen NY-CO-4)	1936	P29692	LVPVGyGIR	K	K	2.62	0.504	1.14	233	238	P29692-238	2
Jun-3AB	PHB	Prohibitin	5245	P35232	KLEAAEDIAyQLSR	R	S	4.37	0.566	7.34	240	249	P35232-249	9
Jun-3AB	TAGLN2	Transgelin-2 (Epididymis tissue protein Li 7e) (SM22-alpha homolog)	8407	P37802	GASQAGMTGyGMPR	R	Q	4.13	0.482	4.96	183	192	P37802-192	15
Jun-3AB	TAGLN2	Transgelin-2 (Epididymis tissue protein Li 7e) (SM22-alpha homolog)	8407	P37802	GPAyGLSR	R	E	2.28	0.336	1.41	5	8	P37802-8	5
Jun-3AB	VDAC2	Voltage-dependent anion-selective channel protein 2 (VDAC-2) (hVDAC2) (Outer mitochondrial membrane protein porin 2)	7417	P45880	NNFAVGyR	R	T	2.42	0.407	2.89	178	184	P45880-184	2
Jun-3AB	NDUFA8	NADH dehydrogenase [ubiquinone] 1 alpha subcomplex subunit 8 (Complex I-19kD) (CI-19kD) (Complex I-PGIV) (CI-PGIV) (NADH-ubiquinone oxidoreductase 19 kDa subunit)	4702	P51970	TDRPLPENPyHSRPRPDPSPEIEGDLQPATHGSR	K	F	3.44	0.377	0	133	142	P51970-142	2
Jun-3AB	NDUFA8	NADH dehydrogenase [ubiquinone] 1 alpha subcomplex subunit 8 (Complex I-19kD) (CI-19kD) (Complex I-PGIV) (CI-PGIV) (NADH-ubiquinone oxidoreductase 19 kDa subunit)	4702	P51970	HcAEPFTEYWTcIDyTGQQLFR	R	H	4.08	0.543	6.26	77	91	P51970-91	3
Jun-3AB	AK2	Adenylate kinase 2, mitochondrial (AK 2) (EC 2.7.4.3) (ATP-AMP transphosphorylase 2) (ATP:AMP phosphotransferase) (Adenylate monophosphate kinase) [Cleaved into: Adenylate kinase 2, mitochondrial, N-terminally processed]	204	P54819	APSVPAAEPEyPKGIR	M	A	0	0	4.66	2	12	P54819-12	2
Jun-3AB	ATP5I	ATP synthase subunit e, mitochondrial (ATPase subunit e)	521	P56385	YSALFLGVAyGATRYNYLKPR	R	A	2.4	0.342	1.77	16	25	P56385-25	1
Jun-3AB	ROMO1	Reactive oxygen species modulator 1 (ROS modulator 1) (Epididymis tissue protein Li 175) (Glyrichin) (Mitochondrial targeting GxxxG motif protein) (MTGM) (Protein MGR2 homolog)	140823	P60602	PVAVGPyGQSQPScFDR	M	V	0	0	4.17	2	8	P60602-8	1
Jun-3AB	ACTB	Actin, cytoplasmic 1 (Beta-actin) [Cleaved into: Actin, cytoplasmic 1, N-terminally processed]	60	P60709	TTGIVMDSGDGVTHTVPIyEGyALPHAILR	R	L	4.17	0.556	5.42	148	166	P60709-166	3
Jun-3AB	ACTB	Actin, cytoplasmic 1 (Beta-actin) [Cleaved into: Actin, cytoplasmic 1, N-terminally processed]	60	P60709	TTGIVMDSGDGVTHTVPIYEGyALPHAILR	R	L	5	0.542	7.2	148	169	P60709-169	21
Jun-3AB	ACTB	Actin, cytoplasmic 1 (Beta-actin) [Cleaved into: Actin, cytoplasmic 1, N-terminally processed]	60	P60709	ILTERGySFTTTAER	K	E	3.11	0.374	2.59	192	198	P60709-198	3
Jun-3AB	ACTB	Actin, cytoplasmic 1 (Beta-actin) [Cleaved into: Actin, cytoplasmic 1, N-terminally processed]	60	P60709	IWHHTFyNELR	K	V	2.82	0.285	0.824	85	91	P60709-91	5
Jun-3AB	RPS3A	40S ribosomal protein S3a (v-fos transformation effector protein) (Fte-1)	6189	P61247	VERADGyEPPVQESV	K	-	2.82	0.586	3.8	250	256	P61247-256	7
Jun-3AB	CNBP	Cellular nucleic acid-binding protein (CNBP) (Zinc finger protein 9)	7555	P62633	TSEVNcyRcGESGHLAR	K	E	3.37	0.55	0.959	153	159	P62633-159	6
Jun-3AB	HIST1H4A	Histone H4	8359	P62805	TVTAMDVVyALKR	K	Q	3.37	0.342	4.39	81	89	P62805-89	8
Jun-3AB	EIF5A	Eukaryotic translation initiation factor 5A-1 (eIF-5A-1) (eIF-5A1) (Eukaryotic initiation factor 5A isoform 1) (eIF-5A) (Rev-binding factor) (eIF-4D)	1984	P63241	NDFQLIGIQDGyLSLLQDSGEVR	R	E	5.32	0.596	4.64	87	98	P63241-98	8
Jun-3AB	EEF1A1	Elongation factor 1-alpha 1 (EF-1-alpha-1) (Elongation factor Tu) (EF-Tu) (Eukaryotic elongation factor 1 A-1) (eEF1A-1) (Leukocyte receptor cluster member 7)	1915	P68104	EHALLAyTLGVK	R	Q	2.91	0.442	1.31	135	141	P68104-141	3
Jun-3AB	TUBA1B	Tubulin alpha-1B chain (Alpha-tubulin ubiquitous) (Tubulin K-alpha-1) (Tubulin alpha-ubiquitous chain)	10376	P68363	VGINyQPPTVVPGGDLAK	K	V	3.32	0.563	2.72	353	357	P68363-357	2
Jun-3AB	RBM3	RNA-binding protein 3 (RNA-binding motif protein 3) (RNPL)	5935	P98179	YYDSRPGGyGYGYGR	R	S	2.72	0.55	3.01	117	125	P98179-125	3
Jun-3AB	RBM3	RNA-binding protein 3 (RNA-binding motif protein 3) (RNPL)	5935	P98179	YYDSRPGGYGyGYGR	R	S	3.53	0.562	2.51	117	127	P98179-127	1
Jun-3AB	RBM3	RNA-binding protein 3 (RNA-binding motif protein 3) (RNPL)	5935	P98179	YYDSRPGGYGYGyGR	R	S	2.52	0.35	0.658	117	129	P98179-129	1
Jun-3AB	RBM3	RNA-binding protein 3 (RNA-binding motif protein 3) (RNPL)	5935	P98179	NQGGYDRySGGNYRDNYDN	R	-	2.7	0.487	1.32	139	146	P98179-146	1
Jun-3AB	CYCS	Cytochrome c	54205	P99999	TGQAPGYSyTAANK	K	N	2.9	0.452	3.07	41	49	P99999-49	2
Jun-3AB	CIRBP	Cold-inducible RNA-binding protein (A18 hnRNP) (Glycine-rich RNA-binding protein CIRP)	1153	Q14011	SGGYGGSRDyYSSR	R	S	2.42	0.326	2.46	132	141	Q14011-141	1
Jun-3AB	CIRBP	Cold-inducible RNA-binding protein (A18 hnRNP) (Glycine-rich RNA-binding protein CIRP)	1153	Q14011	SGGYGGSRDYySSR	R	S	1.61	0.112	1.89	132	142	Q14011-142	1
Jun-3AB	CIRBP	Cold-inducible RNA-binding protein (A18 hnRNP) (Glycine-rich RNA-binding protein CIRP)	1153	Q14011	SSGGSYRDSyDSYATHNE	R	-	3.01	0.457	7	155	164	Q14011-164	2
Jun-3AB	CIRBP	Cold-inducible RNA-binding protein (A18 hnRNP) (Glycine-rich RNA-binding protein CIRP)	1153	Q14011	DSYDSyATHNE	R	-	0	0	1.6	162	167	Q14011-167	1
Jun-3AB	IMMT	MICOS complex subunit MIC60 (Cell proliferation-inducing gene 4/52 protein) (Mitochondrial inner membrane protein) (Mitofilin) (p87/89)	10989	Q16891	VVSQyHELVVQAR	K	D	3.71	0.465	5.17	354	358	Q16891-358	5
Jun-3AB	TIMM50	Mitochondrial import inner membrane translocase subunit TIM50	92609	Q3ZCQ8	TVLEHyALEDDPLAAFK	R	Q	3.93	0.581	4.54	296	301	Q3ZCQ8-301	2
Jun-3AB	TTC19	Tetratricopeptide repeat protein 19, mitochondrial (TPR repeat protein 19)	54902	Q6DKK2	LASIyAAQNR	K	Q	3.08	0.338	0.886	185	189	Q6DKK2-189	3
Jun-3AB	SND1	Staphylococcal nuclease domain-containing protein 1 (100 kDa coactivator) (EBNA2 coactivator p100) (Tudor domain-containing protein 11) (p100 co-activator)	27044	Q7KZF4	ADDADEFGySR	R	-	2.88	0.412	3.7	900	908	Q7KZF4-908	1
Jun-3AB	UPF1	Regulator of nonsense transcripts 1 (EC 3.6.4.-) (ATP-dependent helicase RENT1) (Nonsense mRNA reducing factor 1) (NORF1) (Up-frameshift suppressor 1 homolog) (hUpf1)	5976	Q92900	AYQHGGVTGLSQy	R	-	2.93	0.401	6.43	1117	1129	Q92900-1129	4
Jun-3AB	TBCB	Tubulin-folding cofactor B (Cytoskeleton-associated protein 1) (Cytoskeleton-associated protein CKAPI) (Tubulin-specific chaperone B)	1155	Q99426	LGEyEDVSR	R	V	2.86	0.286	1.52	95	98	Q99426-98	1
Jun-3AB	PHB2	Prohibitin-2 (B-cell receptor-associated protein BAP37) (D-prohibitin) (Repressor of estrogen receptor activity)	11331	Q99623	VLSRPNAQELPSMyQR	R	L	2.92	0.347	2.68	108	121	Q99623-121	2
Jun-3AB	PHB2	Prohibitin-2 (B-cell receptor-associated protein BAP37) (D-prohibitin) (Repressor of estrogen receptor activity)	11331	Q99623	LLLGAGAVAyGVR	K	E	3.3	0.497	1.55	25	34	Q99623-34	3
Jun-3AB	PHB2	Prohibitin-2 (B-cell receptor-associated protein BAP37) (D-prohibitin) (Repressor of estrogen receptor activity)	11331	Q99623	IPWFQyPIIYDIR	R	A	2.48	0.497	2.72	72	77	Q99623-77	2
Jun-3AB	HNRNPAB	Heterogeneous nuclear ribonucleoprotein A/B (hnRNP A/B) (APOBEC1-binding protein 1) (ABBP-1)	3182	Q99729	EVYQQQQyGSGGR	K	G	2.83	0.557	2.37	233	240	Q99729-240	1
Jun-3AB	APOO	MICOS complex subunit MIC26 (Apolipoprotein O) (MICOS complex subunit MIC23) (Protein FAM121B)	79135	Q9BUR5	VDELSLYSVPEGQSKyVEEAR	K	S	2.86	0.329	1.59	37	52	Q9BUR5-52	3
Jun-3AB	TIMMDC1	Complex I assembly factor TIMMDC1, mitochondrial (Protein M5-14) (Translocase of inner mitochondrial membrane domain-containing protein 1) (TIMM domain containing-protein 1)	51300	Q9NPL8	RLPyVPEPYYPESGWDR	K	L	3.45	0.392	0.796	41	44	Q9NPL8-44	1
Jun-3AB	STARD7	StAR-related lipid transfer protein 7, mitochondrial (Gestational trophoblastic tumor protein 1) (START domain-containing protein 7) (StARD7)	56910	Q9NQZ5	VFGTyTDVTPR	R	Q	3.26	0.388	4.24	167	171	Q9NQZ5-171	1
Jun-3AB	DIABLO	Diablo homolog, mitochondrial (Direct IAP-binding protein with low pI) (Second mitochondria-derived activator of caspase) (Smac)	56616	Q9NR28	AVyTLTSLYR	K	Q	2.22	0.385	3.44	106	108	Q9NR28-108	3
Jun-3AB	DIABLO	Diablo homolog, mitochondrial (Direct IAP-binding protein with low pI) (Second mitochondria-derived activator of caspase) (Smac)	56616	Q9NR28	AVYTLTSLyR	K	Q	2.4	0.432	2.85	106	114	Q9NR28-114	3
Jun-3AB	DIABLO	Diablo homolog, mitochondrial (Direct IAP-binding protein with low pI) (Second mitochondria-derived activator of caspase) (Smac)	56616	Q9NR28	TQEEGEERAESEQEAyLRED	K	-	3.99	0.51	2.47	220	235	Q9NR28-235	10
Jun-3AB	OCIAD1	OCIA domain-containing protein 1 (Ovarian carcinoma immunoreactive antigen)	54940	Q9NX40	SSPPGHyYQK	R	S	2.74	0.314	1.74	122	128	Q9NX40-128	1
Jun-3AB	OCIAD1	OCIA domain-containing protein 1 (Ovarian carcinoma immunoreactive antigen)	54940	Q9NX40	NITyEELR	K	N	2.35	0.105	2.6	196	199	Q9NX40-199	4
Jun-3AB	OCIAD1	OCIA domain-containing protein 1 (Ovarian carcinoma immunoreactive antigen)	54940	Q9NX40	NRESyEVSLTQK	K	T	2.9	0.375	0	206	210	Q9NX40-210	1
Jun-3AB	CHCHD3	MICOS complex subunit MIC19 (Coiled-coil-helix-coiled-coil-helix domain-containing protein 3)	54927	Q9NX63	SSEFyRVTTEQYQK	R	A	3.75	0.527	5.11	152	156	Q9NX63-156	7
Jun-3AB	CHCHD3	MICOS complex subunit MIC19 (Coiled-coil-helix-coiled-coil-helix domain-containing protein 3)	54927	Q9NX63	FKRyESHPVcADLQAK	K	I	2.35	0.261	4.28	174	177	Q9NX63-177	3
Jun-3AB	CHCHD3	MICOS complex subunit MIC19 (Coiled-coil-helix-coiled-coil-helix domain-containing protein 3)	54927	Q9NX63	SQRySGAYGASVSDEELK	K	R	3.85	0.589	2.74	46	49	Q9NX63-49	5
Jun-3AB	CHCHD3	MICOS complex subunit MIC19 (Coiled-coil-helix-coiled-coil-helix domain-containing protein 3)	54927	Q9NX63	YSGAyGASVSDEELK	R	R	4.52	0.712	6.96	49	53	Q9NX63-53	9
Jun-3AB	TIMM10B	Mitochondrial import inner membrane translocase subunit Tim10 B (Fracture callus protein 1) (FxC1) (Mitochondrial import inner membrane translocase subunit Tim9 B) (TIMM10B) (Tim10b)	26515	Q9Y5J6	RIADyEAASAVPGVAAEQPGVSPSGS	R	-	3.52	0.532	6.55	78	82	Q9Y5J6-82	3

## Sheet: S3
Replicate	Gene Name	Gene Description	Entrez ID	UNIPROT ID	Peptide sequence	Previous amino acid	Next amino acid	SEQUEST XCorr score	SEQUEST DCn score	X! Tandem -log(e) score	Peptide START	Labeling site	UNIPROT-site	Unique Spectrum Count
JUL-3AB	PDCD5	Programmed cell death protein 5 (TF-1 cell apoptosis-related protein 19) (Protein TFAR19)	9141	O14737	AVENyLIQMAR	K	Y	2.86	0.393	3.42	69	73	O14737-73	1
JUL-3AB	OPA1	Dynamin-like 120 kDa protein, mitochondrial (EC 3.6.5.5) (Optic atrophy protein 1) [Cleaved into: Dynamin-like 120 kDa protein, form S1]	4976	O60313-2	AAGQYSTSyAQQK	R	R	3.31	0.423	1.1	231	239	O60313-2-239	1
JUL-3AB	TIMM17B	Mitochondrial import inner membrane translocase subunit Tim17-B	10245	O60830	NAPPFLEDPSQLPPKDGTPAPGyPSYQQYH	R	-	3.9	0.6	3.19	143	165	O60830-165	1
JUL-3AB	TIMM17B	Mitochondrial import inner membrane translocase subunit Tim17-B	10245	O60830	DGTPAPGYPSyQQYH	K	-	3.25	0.633	1	158	168	O60830-168	7
JUL-3AB	SCO1	Protein SCO1 homolog, mitochondrial	6341	O75880	EAIANyVKEFSPK	K	L	3.26	0.341	4.57	211	216	O75880-216	1
JUL-3AB	SCO1	Protein SCO1 homolog, mitochondrial	6341	O75880	AYRVyYSPGPK	R	D	2.67	0.342	1.7	240	244	O75880-244	1
JUL-3AB	SCO1	Protein SCO1 homolog, mitochondrial	6341	O75880	KGEIAASIATHMRPyR	R	K	2.89	0.461	2.07	283	297	O75880-297	11
JUL-3AB	TOMM70A	Mitochondrial import receptor subunit TOM70 (Mitochondrial precursor proteins import receptor) (Translocase of outer membrane 70 kDa subunit)	9868	O94826	QAyTGNNSSQIQAAMK	R	G	3.62	0.502	3	448	450	O94826-450	2
JUL-3AB	NDUFB10	NADH dehydrogenase [ubiquinone] 1 beta subcomplex subunit 10 (Complex I-PDSW) (CI-PDSW) (NADH-ubiquinone oxidoreductase PDSW subunit)	4716	O96000	EGQNyQQNcIK	R	E	2.72	0.375	1.19	111	115	O96000-115	1
JUL-3AB	NDUFB10	NADH dehydrogenase [ubiquinone] 1 beta subcomplex subunit 10 (Complex I-PDSW) (CI-PDSW) (NADH-ubiquinone oxidoreductase PDSW subunit)	4716	O96000	AYQDRyQDLGAYSSAR	K	K	2.87	0.381	1.34	132	137	O96000-137	1
JUL-3AB	NDUFB10	NADH dehydrogenase [ubiquinone] 1 beta subcomplex subunit 10 (Complex I-PDSW) (CI-PDSW) (NADH-ubiquinone oxidoreductase PDSW subunit)	4716	O96000	YQDLGAySSAR	R	K	2.98	0.433	0	137	143	O96000-143	1
JUL-3AB	ALDOA	Fructose-bisphosphate aldolase A (EC 4.1.2.13) (Lung cancer antigen NY-LU-1) (Muscle-type aldolase)	226	P04075	YTPSGQAGAAASESLFVSNHAy	K	-	5.47	0.693	15.4	343	364	P04075-364	6
JUL-3AB	HSP90AA1	Heat shock protein HSP 90-alpha (Heat shock 86 kDa) (HSP 86) (HSP86) (Lipopolysaccharide-associated protein 2) (LAP-2) (LPS-associated protein 2) (Renal carcinoma antigen NY-REN-38)	3320	P07900	LVTSPccIVTSTyGWTANMER	R	I	3.59	0.423	1.57	592	604	P07900-604	1
JUL-3AB	CYC1	Cytochrome c1, heme protein, mitochondrial (Complex III subunit 4) (Complex III subunit IV) (Cytochrome b-c1 complex subunit 4) (Ubiquinol-cytochrome-c reductase complex cytochrome c1 subunit) (Cytochrome c-1)	1537	P08574	HLVGVcyTEDEAK	R	E	3.96	0.537	0	134	140	P08574-140	2
JUL-3AB	CYC1	Cytochrome c1, heme protein, mitochondrial (Complex III subunit 4) (Complex III subunit IV) (Cytochrome b-c1 complex subunit 4) (Ubiquinol-cytochrome-c reductase complex cytochrome c1 subunit) (Cytochrome c-1)	1537	P08574	LFDyFPKPYPNSEAAR	K	A	2.79	0.507	1.4	171	174	P08574-174	2
JUL-3AB	HNRNPA1	Heterogeneous nuclear ribonucleoprotein A1 (hnRNP A1) (Helix-destabilizing protein) (Single-strand RNA-binding protein) (hnRNP core protein A1) [Cleaved into: Heterogeneous nuclear ribonucleoprotein A1, N-terminally processed]	3178	P09651	NQGGYGGSSSSSSyGSGR	R	R	4.36	0.613	4.96	353	366	P09651-366	4
JUL-3AB	HSPA1A	Heat shock 70 kDa protein 1A (Heat shock 70 kDa protein 1) (HSP70-1) (HSP70.1)	3303	P0DMV8	ELEQVcNPIISGLyQGAGGPGPGGFGAQGPK	K	G	5.47	0.639	6.74	598	611	P0DMV8-611	2
JUL-3AB	CKMT1A	Creatine kinase U-type, mitochondrial (EC 2.7.3.2) (Acidic-type mitochondrial creatine kinase) (Mia-CK) (Ubiquitous mitochondrial creatine kinase) (U-MtCK)	1159	P12532	GWEFMWNERLGyILTcPSNLGTGLR	R	A	4.45	0.435	2.48	301	312	P12532-312	4
JUL-3AB	COX4I1	Cytochrome c oxidase subunit 4 isoform 1, mitochondrial (Cytochrome c oxidase polypeptide IV) (Cytochrome c oxidase subunit IV isoform 1) (COX IV-1)	1327	P13073	HyVYGPLPQSFDKEWVAK	K	Q	2.12	-0.00566	3.8	123	124	P13073-124	1
JUL-3AB	COX4I1	Cytochrome c oxidase subunit 4 isoform 1, mitochondrial (Cytochrome c oxidase polypeptide IV) (Cytochrome c oxidase subunit IV isoform 1) (COX IV-1)	1327	P13073	HYVyGPLPQSFDKEWVAK	K	Q	3.56	0.424	3.47	123	126	P13073-126	1
JUL-3AB	COX6B1	Cytochrome c oxidase subunit 6B1 (Cytochrome c oxidase subunit VIb isoform 1) (COX VIb-1)	1340	P14854	IKNyKTAPFDSR	K	F	3.14	0.423	3.41	9	12	P14854-12	7
JUL-3AB	COX6B1	Cytochrome c oxidase subunit 6B1 (Cytochrome c oxidase subunit VIb isoform 1) (COX VIb-1)	1340	P14854	NcWQNyLDFHR	R	C	2.77	0.266	1.72	29	34	P14854-34	1
JUL-3AB	VDAC1	Voltage-dependent anion-selective channel protein 1 (VDAC-1) (hVDAC1) (Outer mitochondrial membrane protein porin 1) (Plasmalemmal porin) (Porin 31HL) (Porin 31HM)	7416	P21796	YRWTEyGLTFTEK	K	W	4.04	0.394	1.92	62	67	P21796-67	6
JUL-3AB	HNRNPA2B1	Heterogeneous nuclear ribonucleoproteins A2/B1 (hnRNP A2/B1)	3181	P22626	NMGGPYGGGNYGPGGSGGSGGyGGR	R	S	6.19	0.538	1.85	326	347	P22626-347	1
JUL-3AB	PHB	Prohibitin	5245	P35232	KLEAAEDIAyQLSR	R	S	4.33	0.589	7.08	240	249	P35232-249	7
JUL-3AB	TAGLN2	Transgelin-2 (Epididymis tissue protein Li 7e) (SM22-alpha homolog)	8407	P37802	GASQAGmTGyGMPR	R	Q	3.24	0.485	2.13	183	192	P37802-192	2
JUL-3AB	NDUFA8	NADH dehydrogenase [ubiquinone] 1 alpha subcomplex subunit 8 (Complex I-19kD) (CI-19kD) (Complex I-PGIV) (CI-PGIV) (NADH-ubiquinone oxidoreductase 19 kDa subunit)	4702	P51970	TDRPLPENPyHSRPRPDPSPEIEGDLQPATHGSR	K	F	3.45	0.49	0	133	142	P51970-142	5
JUL-3AB	NDUFA8	NADH dehydrogenase [ubiquinone] 1 alpha subcomplex subunit 8 (Complex I-19kD) (CI-19kD) (Complex I-PGIV) (CI-PGIV) (NADH-ubiquinone oxidoreductase 19 kDa subunit)	4702	P51970	HcAEPFTEYWTcIDyTGQQLFR	R	H	4.81	0.6	5.03	77	91	P51970-91	4
JUL-3AB	HCCS	Cytochrome c-type heme lyase (CCHL) (EC 4.4.1.17) (Holocytochrome c-type synthase)	3052	P53701	AYEyVEcPIR	R	G	2.93	0.387	1.11	60	63	P53701-63	3
JUL-3AB	AK2	Adenylate kinase 2, mitochondrial (AK 2) (EC 2.7.4.3) (ATP-AMP transphosphorylase 2) (ATP:AMP phosphotransferase) (Adenylate monophosphate kinase) [Cleaved into: Adenylate kinase 2, mitochondrial, N-terminally processed]	204	P54819	APSVPAAEPEyPKGIR	M	A	0	0	4	2	12	P54819-12	2
JUL-3AB	ATP5I	ATP synthase subunit e, mitochondrial (ATPase subunit e)	521	P56385	YSALFLGVAYGATRYNyLKPR	R	A	2.93	0.626	1.72	16	32	P56385-32	1
JUL-3AB	ACTB	Actin, cytoplasmic 1 (Beta-actin) [Cleaved into: Actin, cytoplasmic 1, N-terminally processed]	60	P60709	TTGIVMDSGDGVTHTVPIyEGyALPHAILR	R	L	3.93	0.487	5.34	148	166	P60709-166	2
JUL-3AB	ACTB	Actin, cytoplasmic 1 (Beta-actin) [Cleaved into: Actin, cytoplasmic 1, N-terminally processed]	60	P60709	TTGIVMDSGDGVTHTVPIYEGyALPHAILR	R	L	5.69	0.635	8.44	148	169	P60709-169	23
JUL-3AB	ACTB	Actin, cytoplasmic 1 (Beta-actin) [Cleaved into: Actin, cytoplasmic 1, N-terminally processed]	60	P60709	ILTERGySFTTTAER	K	E	4.17	0.553	0	192	198	P60709-198	1
JUL-3AB	ACTB	Actin, cytoplasmic 1 (Beta-actin) [Cleaved into: Actin, cytoplasmic 1, N-terminally processed]	60	P60709	IWHHTFyNELR	K	V	3.14	0.324	0.959	85	91	P60709-91	2
JUL-3AB	RPS3A	40S ribosomal protein S3a (v-fos transformation effector protein) (Fte-1)	6189	P61247	VERADGyEPPVQESV	K	-	3.06	0.487	3.28	250	256	P61247-256	1
JUL-3AB	CNBP	Cellular nucleic acid-binding protein (CNBP) (Zinc finger protein 9)	7555	P62633	TSEVNcyRcGESGHLAR	K	E	2.58	0.341	1.14	153	159	P62633-159	1
JUL-3AB	EIF5A	Eukaryotic translation initiation factor 5A-1 (eIF-5A-1) (eIF-5A1) (Eukaryotic initiation factor 5A isoform 1) (eIF-5A) (Rev-binding factor) (eIF-4D)	1984	P63241	RNDFQLIGIQDGyLSLLQDSGEVR	K	E	4.08	0.413	1.57	86	98	P63241-98	2
JUL-3AB	YBX1	Nuclease-sensitive element-binding protein 1 (CCAAT-binding transcription factor I subunit A) (CBF-A) (DNA-binding protein B) (DBPB) (Enhancer factor I subunit A) (EFI-A) (Y-box transcription factor) (Y-box-binding protein 1) (YB-1)	4904	P67809	NYQQNyQNSESGEKNEGSESAPEGQAQQR	R	R	4.68	0.699	5.66	157	162	P67809-162	3
JUL-3AB	YBX1	Nuclease-sensitive element-binding protein 1 (CCAAT-binding transcription factor I subunit A) (CBF-A) (DNA-binding protein B) (DBPB) (Enhancer factor I subunit A) (EFI-A) (Y-box transcription factor) (Y-box-binding protein 1) (YB-1)	4904	P67809	RPQySNPPVQGEVMEGADNQGAGEQGRPVR	R	Q	4.08	0.528	1.12	205	208	P67809-208	9
JUL-3AB	TUBA1B	Tubulin alpha-1B chain (Alpha-tubulin ubiquitous) (Tubulin K-alpha-1) (Tubulin alpha-ubiquitous chain)	10376	P68363	VGINyQPPTVVPGGDLAK	K	V	3.52	0.55	4.8	353	357	P68363-357	3
JUL-3AB	RBM3	RNA-binding protein 3 (RNA-binding motif protein 3) (RNPL)	5935	P98179	YYDSRPGGYGyGYGR	R	S	3.25	0.503	1.03	117	127	P98179-127	1
JUL-3AB	RBM3	RNA-binding protein 3 (RNA-binding motif protein 3) (RNPL)	5935	P98179	YYDSRPGGYGYGyGR	R	S	3.14	0.483	0	117	129	P98179-129	1
JUL-3AB	CYCS	Cytochrome c	54205	P99999	TGQAPGySYTAANK	K	N	3.28	0.449	1.06	41	47	P99999-47	2
JUL-3AB	CYCS	Cytochrome c	54205	P99999	TGQAPGYSyTAANK	K	N	3.98	0.518	5.72	41	49	P99999-49	1
JUL-3AB	CIRBP	Cold-inducible RNA-binding protein (A18 hnRNP) (Glycine-rich RNA-binding protein CIRP)	1153	Q14011	SSGGSYRDSyDSYATHNE	R	-	4.37	0.573	1.6	155	164	Q14011-164	2
JUL-3AB	IMMT	MICOS complex subunit MIC60 (Cell proliferation-inducing gene 4/52 protein) (Mitochondrial inner membrane protein) (Mitofilin) (p87/89)	10989	Q16891	VVSQyHELVVQAR	K	D	3.89	0.507	7.44	354	358	Q16891-358	4
JUL-3AB	IMMT	MICOS complex subunit MIC60 (Cell proliferation-inducing gene 4/52 protein) (Mitochondrial inner membrane protein) (Mitofilin) (p87/89)	10989	Q16891	LFEMVLGPAAyNVPLPK	K	K	2.92	0.53	1.34	85	95	Q16891-95	1
JUL-3AB	TIMM50	Mitochondrial import inner membrane translocase subunit TIM50	92609	Q3ZCQ8	TVLEHyALEDDPLAAFK	R	Q	3.71	0.583	2.89	296	301	Q3ZCQ8-301	2
JUL-3AB	AGK	Acylglycerol kinase, mitochondrial (hAGK) (EC 2.7.1.107) (EC 2.7.1.94) (Multiple substrate lipid kinase) (HsMuLK) (MuLK) (Multi-substrate lipid kinase)	55750	Q53H12	LASyWAQPQDALSQEVSPEVWK	R	D	3.23	0.325	3.41	283	286	Q53H12-286	1
JUL-3AB	COX20	Cytochrome c oxidase protein 20 homolog	116228	Q5RI15	ILyEGTHLDPER	K	K	3.35	0.315	1.85	99	101	Q5RI15-101	2
JUL-3AB	PHB2	Prohibitin-2 (B-cell receptor-associated protein BAP37) (D-prohibitin) (Repressor of estrogen receptor activity)	11331	Q99623	VLSRPNAQELPSMyQR	R	L	2.91	0.488	0	108	121	Q99623-121	3
JUL-3AB	APOO	MICOS complex subunit MIC26 (Apolipoprotein O) (MICOS complex subunit MIC23) (Protein FAM121B)	79135	Q9BUR5	VDELSLYSVPEGQSKyVEEAR	K	S	3.16	0.488	4	37	52	Q9BUR5-52	6
JUL-3AB	HIGD2A	HIG1 domain family member 2A, mitochondrial (RCF1 homolog B) (RCF1b)	192286	Q9BW72	aTPGPVIPEVPFEPSKPPVIEGLSPTVyRNPESFK	M	E	0	0	3.49	2	29	Q9BW72-29	3
JUL-3AB	CLPB	Caseinolytic peptidase B protein homolog (EC 3.6.1.3) (Suppressor of potassium transport defect 3)	81570	Q9H078	FIGSPPGyVGHEEGGQLTK	K	K	3.76	0.428	1.17	423	430	Q9H078-430	2
JUL-3AB	CLPB	Caseinolytic peptidase B protein homolog (EC 3.6.1.3) (Suppressor of potassium transport defect 3)	81570	Q9H078	EVADVLVDGyNVHYGAR	R	S	2.5	0.449	2.89	604	613	Q9H078-613	1
JUL-3AB	GHITM	Growth hormone-inducible transmembrane protein (Dermal papilla-derived protein 2) (Mitochondrial morphology and cristae structure 1) (MICS1) (Transmembrane BAX inhibitor motif-containing protein 5)	27069	Q9H3K2	RAEVSPMyGVQK	K	Y	3.76	0.374	0	301	308	Q9H3K2-308	6
JUL-3AB	PTGES2	Prostaglandin E synthase 2 (Membrane-associated prostaglandin E synthase-2) (mPGE synthase-2) (Microsomal prostaglandin E synthase 2) (mPGES-2) (Prostaglandin-H(2) E-isomerase) (EC 5.3.99.3) [Cleaved into: Prostaglandin E synthase 2 truncated form]	80142	Q9H7Z7	TYLVSGQPLEEIITyYPAMK	K	A	2.88	0.434	1.41	174	188	Q9H7Z7-188	2
JUL-3AB	PTGES2	Prostaglandin E synthase 2 (Membrane-associated prostaglandin E synthase-2) (mPGE synthase-2) (Microsomal prostaglandin E synthase 2) (mPGES-2) (Prostaglandin-H(2) E-isomerase) (EC 5.3.99.3) [Cleaved into: Prostaglandin E synthase 2 truncated form]	80142	Q9H7Z7	TYLVSGQPLEEIITYyPAMK	K	A	3.32	0.537	3.85	174	189	Q9H7Z7-189	2
JUL-3AB	PTGES2	Prostaglandin E synthase 2 (Membrane-associated prostaglandin E synthase-2) (mPGE synthase-2) (Microsomal prostaglandin E synthase 2) (mPGES-2) (Prostaglandin-H(2) E-isomerase) (EC 5.3.99.3) [Cleaved into: Prostaglandin E synthase 2 truncated form]	80142	Q9H7Z7	TPTEALASFDyIVR	R	E	3.18	0.415	0	253	263	Q9H7Z7-263	2
JUL-3AB	TIMMDC1	Complex I assembly factor TIMMDC1, mitochondrial (Protein M5-14) (Translocase of inner mitochondrial membrane domain-containing protein 1) (TIMM domain containing-protein 1)	51300	Q9NPL8	RLPyVPEPYYPESGWDR	K	L	4.2	0.584	2.42	41	44	Q9NPL8-44	4
JUL-3AB	STARD7	StAR-related lipid transfer protein 7, mitochondrial (Gestational trophoblastic tumor protein 1) (START domain-containing protein 7) (StARD7)	56910	Q9NQZ5	RPITGTHLYQyRVFGTYTDVTPR	R	Q	4.27	0.563	0.638	155	165	Q9NQZ5-165	1
JUL-3AB	STARD7	StAR-related lipid transfer protein 7, mitochondrial (Gestational trophoblastic tumor protein 1) (START domain-containing protein 7) (StARD7)	56910	Q9NQZ5	VFGTyTDVTPR	R	Q	2.13	0.38	4.15	167	171	Q9NQZ5-171	1
JUL-3AB	DIABLO	Diablo homolog, mitochondrial (Direct IAP-binding protein with low pI) (Second mitochondria-derived activator of caspase) (Smac)	56616	Q9NR28	AVYTLTSLyRQYTSLLGK	K	M	2.47	0.583	1.02	106	114	Q9NR28-114	2
JUL-3AB	DIABLO	Diablo homolog, mitochondrial (Direct IAP-binding protein with low pI) (Second mitochondria-derived activator of caspase) (Smac)	56616	Q9NR28	AVYTLTSLYRQyTSLLGK	K	M	2.97	0.485	4.4	106	117	Q9NR28-117	2
JUL-3AB	DIABLO	Diablo homolog, mitochondrial (Direct IAP-binding protein with low pI) (Second mitochondria-derived activator of caspase) (Smac)	56616	Q9NR28	AESEQEAyLRED	R	-	3.54	0.429	1.15	228	235	Q9NR28-235	4
JUL-3AB	OCIAD1	OCIA domain-containing protein 1 (Ovarian carcinoma immunoreactive antigen)	54940	Q9NX40	NRESyEVSLTQK	K	T	3.44	0.411	2.36	206	210	Q9NX40-210	2
JUL-3AB	CHCHD3	MICOS complex subunit MIC19 (Coiled-coil-helix-coiled-coil-helix domain-containing protein 3)	54927	Q9NX63	SSEFyRVTTEQYQK	R	A	3.62	0.485	0	152	156	Q9NX63-156	10
JUL-3AB	CHCHD3	MICOS complex subunit MIC19 (Coiled-coil-helix-coiled-coil-helix domain-containing protein 3)	54927	Q9NX63	VTTEQyQKAAEEVEAK	R	F	4.02	0.523	0.959	158	163	Q9NX63-163	5
JUL-3AB	CHCHD3	MICOS complex subunit MIC19 (Coiled-coil-helix-coiled-coil-helix domain-containing protein 3)	54927	Q9NX63	FKRyESHPVcADLQAK	K	I	3.14	0.419	4.07	174	177	Q9NX63-177	7
JUL-3AB	CHCHD3	MICOS complex subunit MIC19 (Coiled-coil-helix-coiled-coil-helix domain-containing protein 3)	54927	Q9NX63	SQRySGAYGASVSDEELK	K	R	6.01	0.663	10.8	46	49	Q9NX63-49	12
JUL-3AB	CHCHD3	MICOS complex subunit MIC19 (Coiled-coil-helix-coiled-coil-helix domain-containing protein 3)	54927	Q9NX63	SQRYSGAyGASVSDEELKR	K	R	4.96	0.412	2.06	46	53	Q9NX63-53	9
JUL-3AB	CDV3	Protein CDV3 homolog	55573	Q9UKY7	TAPVQAPPAPVIVTETPEPAMTSGVyRPPGAR	K	L	1.87	0.188	2.07	144	169	Q9UKY7-169	1
JUL-3AB	CDV3	Protein CDV3 homolog	55573	Q9UKY7	LQLDNQyAVLENQK	K	S	4.62	0.405	0	238	244	Q9UKY7-244	1
JUL-3AB	HIGD1A	HIG1 domain family member 1A, mitochondrial (Hypoxia-inducible gene 1 protein) (RCF1 homolog A) (RCF1a)	25994	Q9Y241	sTDTGVSLPSyEEDQGSK	M	L	0	0	2.8	2	12	Q9Y241-12	1
JUL-3AB	TIMM10B	Mitochondrial import inner membrane translocase subunit Tim10 B (Fracture callus protein 1) (FxC1) (Mitochondrial import inner membrane translocase subunit Tim9 B) (TIMM10B) (Tim10b)	26515	Q9Y5J6	RIADyEAASAVPGVAAEQPGVSPSGS	R	-	3.75	0.349	4.47	78	82	Q9Y5J6-82	6

[truncated: 3 more sheets: U1, U2, U3]
